# Supplementary material for: Piperazine-1,4-diol (PipzDiol): synthesis, stereodynamics and assembly of supramolecular hydrogen-bonded 2D networks
Source: Royal Society of Chemistry journal article supplement (doi:10.1039/d2nj03012h), 2022-01-01
Supplement: d2nj03012h1.pdf [file d2nj03012h1.pdf]

## Supporting information

### Piperazine-1,4-diol (PipzDiol): Synthesis, Stereodynamics and Assembly of Supramolecular Hydrogen-Bonded 2D Networks

Vladislav K. Lesnikov,<sup>a</sup> Yulia V. Nelyubina,<sup>b</sup> Alexey Yu. Sukhorukov<sup>a,\*</sup>

<sup>a</sup> N. D. Zelinsky Institute of Organic Chemistry, Russian Academy of Sciences, 119991, Leninsky prospect, 47, Moscow, Russian Federation

<sup>b</sup> A. N. Nesmeyanov Institute of Organoelement Compounds, Russian Academy of Sciences, 119991, Vavilova str. 28, Moscow, Russian Federation

\* Corresponding author: [sukhorukov@ioc.ac.ru](mailto:sukhorukov@ioc.ac.ru)

#### Table of contents

|                                            |     |
|--------------------------------------------|-----|
| General information and instrumentation    | S2  |
| Synthesis and characterization of products | S3  |
| Spectra of products                        | S12 |
| Dynamic NMR                                | S55 |
| DFT calculations                           | S63 |
| X-Ray analysis                             | S73 |

## General information and instrumentation

All reactions were carried out in oven-dried (150°C) glassware. CH<sub>2</sub>Cl<sub>2</sub>, CHCl<sub>3</sub>, pyridine and DMF were distilled over CaH<sub>2</sub>; ether and methanol were distilled without drying agents. Piperazine, anhydrous dibenzoyl peroxide, Luperox<sup>®</sup> LP (Lauroyl peroxide), organic acids and all inorganic reagents were commercial grade and used as received.

NMR spectra were recorded at indicated temperatures with a Bruker Avance 300 and 600 spectrometers with residual solvent peaks as internal standards.<sup>1</sup> Multiplicities are indicated by s (singlet), d (doublet), m (multiplet), and br (broad). Data acquisition and processing were performed with Topspin 4.1.3 and Mestrenova 12.0.0 software, respectively.

Melting points were determined on a Kofler heating stage and were not corrected. HRMS experiments were performed on a mass-spectrometer with electrospray ionization and a time-of-flight (TOF) detector. Peaks in FT-IR spectra data are reported in cm<sup>-1</sup> with the following relative intensities: s (strong), m (medium), w (weak), br (broad), sh (shoulder). Elemental analysis is average of two combustions. Analytical thin-layer chromatography was performed on silica gel plates with QF 254. Visualization was accomplished with UV light, solution of ninhydrin in ethanol, Dragendorff's reagent solution and iodine absorbed on silica gel.

For details of other methods see corresponding sections.

---

<sup>1</sup> Fulmer, G. R.; Miller, A. J. M.; Sherden, N. H.; Gottlieb, H. E.; Nudelman, A.; Stoltz, B. M.; Bercaw, J. E.; Goldberg, K. I. NMR Chemical Shifts of Trace Impurities: Common Laboratory Solvents, Organics, and Gases in Deuterated Solvents Relevant to the Organometallic Chemist. *Organometallics* **2010**, 29 (9), 2176–2179.

## Synthesis and characterization of products

### Reaction of piperazine with dibenzoyl peroxide

Into the Schlenk tube were placed  $\text{Cs}_2\text{CO}_3$  (6 equiv., 69.7 mmol, 22.7 g), anhydrous  $\text{Bz}_2\text{O}_2$  (4 equiv., 46.4 mmol, 11.3 g) and  $\text{CH}_2\text{Cl}_2$  (112 mL) under argon atmosphere and the mixture was stirred for 15 min. Then, a solution of piperazine (1 equiv., 11.6 mmol, 1.0 g) in  $\text{CH}_2\text{Cl}_2$  (44 mL) was added. The mixture was stirred under reflux 8 hours (TLC control). After cooling to rt, 95 mL of water was added and the mixture was stirred for additional 15 min. Organic phase was separated, aqueous layer was washed with  $\text{CH}_2\text{Cl}_2$  (2×155 mL). Combined organic extracts were washed with brine, dried over anhydrous  $\text{Na}_2\text{SO}_4$  and concentrated in vacuum. The residue was triturated with  $\text{Et}_2\text{O}$  to remove most of unreacted dibenzoyl peroxide. The residual solid was dissolved in  $\text{CH}_2\text{Cl}_2$ , pre-adsorbed on silica gel and subjected to a column chromatography on silica gel (eluent EtOAc–hexane, 1 : 9  $\rightarrow$  1 : 3) to give 2.3 g (61 %) of product **3a**. Further elution with EtOAc–hexane (1 : 1) gave 0.32 g (9 %) of side product **4a**.

### 1,4-Dibenzoyloxypiperazine (**3a**)

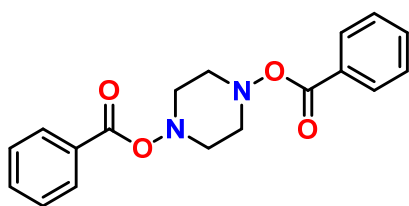

White powder.  $R_f$  = 0.5 (hexane–EtOAc, 1:1). Mp 143 – 144 °C.

$^1\text{H}$  NMR (300 MHz,  $\text{CDCl}_3$ , 300 K, HSQC, mixture of conformers/invertomers):  $\delta$  8.03 (d,  $J$  = 7.5 Hz, 4H, 2 *o*-Ph), 7.59 (t,  $J$  = 7.5 Hz, 2H, 2 *p*-Ph), 7.46 (t,  $J$  = 7.5 Hz, 4H, 2 *m*-Ph), 3.56 and 3.36 (2 br m, 8H, 4  $\text{CH}_2$ ).

$^{13}\text{C}$  NMR (75 MHz,  $\text{CDCl}_3$ , 300 K, HSQC, mixture of conformers/invertomers):  $\delta$  164.6 (2 C=O), 133.4 (2 *p*-Ph), 129.6 (4 *o*-Ph), 129.1 (2 *i*-Ph), 128.6 (4 *m*-Ph), 54.4 and 53.0 (2 br, 4  $\text{CH}_2$ ).

ESI-HRMS  $m/z$ :  $[\text{M}+\text{H}]^+$  Calcd for  $[\text{C}_{18}\text{H}_{19}\text{N}_2\text{O}_4]^+$  327.1339; Found 327.1336.

### 1-(Benzoyl)-4-(benzoyloxy)piperazine (**4a**)

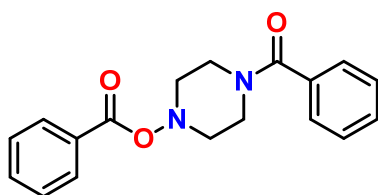

White powder.  $R_f = 0.32$  (hexane–EtOAc, 1:1). Mp 132 – 135 °C.

$^1\text{H}$  NMR (300 MHz,  $\text{CDCl}_3$ , 300 K, HSQC, mixture of conformers/invertomers):  $\delta$  8.04 – 7.99 (m, 3H,  $p\text{-Bz}_\text{N}$  and  $o\text{-Bz}_\text{O}$ ), 7.61 – 7.56 (m, 1H,  $p\text{-Bz}_\text{O}$ ), 7.49 – 7.43 (m, 6H,  $o\text{-Bz}_\text{N}$ ,  $m\text{-Bz}_\text{N}$  and  $m\text{-Bz}_\text{O}$ ), 3.54, 3.37 and 2.99 (3 br m, 8H, 4  $\text{CH}_2$ ).

$^{13}\text{C}$  NMR (75 MHz,  $\text{CDCl}_3$ , 300 K, HSQC, mixture of conformers/invertomers):  $\delta$  170.4 (O=C=O), 164.5 (N=C=O), 135.1 and 133.4 (2  $p\text{-Ph}$ ), 130.1 and 128.9 (2  $i\text{-Ph}$ ), 129.5, 128.6, 128.5 and 127.1 (4  $o\text{-Ph}$  and 4  $m\text{-Ph}$ ), 56.0 (4  $\text{CH}_2\text{N}$ ).

ESI-HRMS  $m/z$ :  $[\text{M}+\text{H}]^+$  Calcd for  $[\text{C}_{18}\text{H}_{19}\text{N}_2\text{O}_3]^+$  311.1390; Found 311.1390.

### Synthesis of adamantane-1-carboxylic peroxyanhydride (adamatoyl peroxide)<sup>2</sup>

Adamantane-1-carboxylic acid (1 equiv., 5.55 mmol, 1.0 g) was dissolved in 22 mL of dry DMF and cooled under stirring on ice-bath. Oxalyl chloride (3 equiv., 16.64 mmol, 2.11 g) was added dropwise while the temperature of mixture was below 35°C. After addition the mixture was stirred additional hour at rt. The solvent was removed under reduced pressure and the residual was re-dissolved in 10 mL of ether and cooled under stirring on ice-bath. Hydrogen peroxide (27%, 0.75 equiv., 4.23 mmol, 533 mg) and pyridine (1.2 equiv., 6.76 mmol, 0.545 mL) were consequently added dropwise while the temperature of mixture was below 30°C. After addition the mixture was stirred additional 1 hour at rt. Then, the mixture was diluted with 10 mL of ether, washed with 20 mL of 3.5% solution of HCl in distilled water, 3 × 20 mL sat.  $\text{NaHCO}_3$  solution, and then with water until the neutral pH was achieved. Organic phase was dried by  $\text{Na}_2\text{SO}_4$ . Crude product was obtained by solvent evaporation with 86% yield (2.42 mmol, 0.87 g) and was used in the next step without further purification due to instability.

### Reaction of piperazine with adamatoyl peroxide

Into the Schlenk tube were placed  $\text{Cs}_2\text{CO}_3$  (6 equiv, 2.51 mmol, 817 mg) and a solution of adamatoyl peroxide (4 equiv., 1.67 mmol, 600 mg) in  $\text{CH}_2\text{Cl}_2$  (6 mL) under argon atmosphere. Then, a solution of piperazine (1 equiv., 0.42 mmol, 36 mg) in  $\text{CH}_2\text{Cl}_2$  (2 mL) was added. The mixture was stirred at rt for overnight (TLC control). Then, 6 mL of water was added and the mixture was stirred additional 10 min. Organic phase was separated, aqueous layer was washed with  $\text{CH}_2\text{Cl}_2$  (2×12

<sup>2</sup> Beckwith, A. L. J., Cross, R. T., Gream, G. E. The mechanism of lead tetraacetate decarboxylation. I. Tertiary carboxylic acids. *Australian J. Chem.*, **1974**, 27 (8), 1673–1692.

mL). Combined organic extracts were washed with brine, dried over anhydrous  $\text{Na}_2\text{SO}_4$  and concentrated in vacuum. The residue was subjected to a column chromatography on silica gel (eluent EtOAc-hexane, 1 : 9  $\rightarrow$  1 : 5  $\rightarrow$  1 : 1) to give 108 mg (58 %) of product **3b**. Further elution with EtOAc–MeOH (7 : 1) gave 12 mg (7 %) of side product **4b**.

#### 1,4-(1-Adamantoyl)oxypiperazine (**3b**)

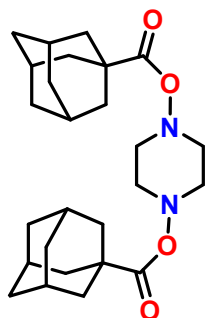

White powder.  $R_f$  = 0.5 (hexane : EtOAc, 1:1). Mp > 250 °C (without decomposition).

$^1\text{H}$  NMR (300 MHz,  $\text{CDCl}_3$ , 298 K, HSQC):  $\delta$  3.63 (s, 8H, 4  $\text{CH}_2\text{N}$ ), 2.01 (s, 6H, CH), 1.95 (br s, 12H,  $\text{CH}_2$ ), 1.69 (br s, 12H,  $\text{CH}_2$ ).

$^{13}\text{C}$  NMR (75 MHz,  $\text{CDCl}_3$ , 298 K, HSQC):  $\delta$  176.1 (2 C=O), 45.5 (4  $\text{CH}_2\text{N}$ ), 41.8 (2 C), 39.1 (6  $\text{CH}_2$ ), 36.6 (6  $\text{CH}_2$ ), 28.4 (6 CH).

FT-IR (KBr): 2907 (s), 2849 (s), 2676 (w), 2656 (w), 1725 (w), 1614 (s, C=O), 1547 (w), 1447 (m), 1416 (s), 1365 (w), 1343 (w), 1316 (w), 1280 (m), 1260 (m), 1226 (s), 1181 (m), 1163 (w), 1100 (w), 1045 (w), 1011 (s), 975 (w), 943 (w), 806 (w), 723 (w), 648 (w), 575 (w), 481 (w), 458 (w).

ESI-HRMS  $m/z$ :  $[\text{M}+\text{H}]^+$  Calcd for  $[\text{C}_{26}\text{H}_{39}\text{N}_2\text{O}_4]^+$  443.2904; Found 443.2895.

#### 1-(1-Adamantoyl)-4-(1-adamantoyl)oxypiperazine (**4b**)

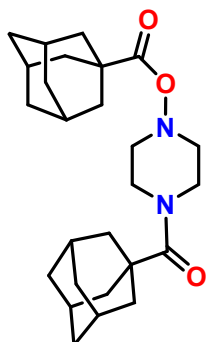

Pale-yellow semi-solid.

$^1\text{H}$  NMR (300 MHz,  $\text{CDCl}_3$ , 298 K, HSQC):  $\delta$  3.67 (s, 8H,  $\text{CH}_2\text{N}$ ), 2.04 (br m, 6H, 6 CH), 1.99 and 1.91 (2 br m, 12H and 12H, 6  $\text{CH}_2$ ), 1.72 (br m, 24H, 6  $\text{CH}_2$ ).

$^{13}\text{C}$  NMR (75 MHz,  $\text{CDCl}_3$ , 298 K, HSQC):  $\delta$  176.3 ( $\text{C}=\text{O}$ ), 45.7 (4  $\text{CH}_2\text{N}$ ), 41.9 (C), 40.6 (C), 39.2 (3  $\text{CH}_2$ ), 38.7 (3  $\text{CH}_2$ ), 36.7 (3  $\text{CH}_2$ ), 36.6 (3  $\text{CH}_2$ ), 28.6 (3 CH), 28.0 (3 CH) (amide carbon is not observed).

FT-IR (KBr): 2927 (s), 2853 (s sh), 2659 (m br), 2635 (m sh), 2248 (w), 1696 (s, sh,  $\text{C}=\text{O}$ ), 1609 (s, sh,  $\text{C}=\text{O}$ ), 1452 (s), 1416 (s), 1345 (w), 1320 (w), 1280 (s), 1245 (s), 1219 (s), 1180 (s), 1103 (m), 1081 (m), 1046 (m), 1011 (s), 975 (m), 916 (s), 816 (w sh), 732 (s), 661 (w, sh), 552 (w), 530 (w), 508 (w), 454 (w).

ESI-HRMS  $m/z$ :  $[\text{M}+\text{H}]^+$  Calcd for  $[\text{C}_{26}\text{H}_{39}\text{N}_2\text{O}_3]^+$  427.2955; Found 427.2962.

### Reaction of piperazine with lauroyl peroxide

Into the Schlenk tube were placed  $\text{Cs}_2\text{CO}_3$  (6 equiv., 1.02 mmol, 332 mg), dodecanoic peroxyanhydride (4 equiv., 0.68 mmol, 270 mg) and  $\text{CH}_2\text{Cl}_2$  (2.5 mL) under argon atmosphere and the mixture was stirred for 15 min. Then, a solution of piperazine (1 equiv., 0.17 mmol, 15 mg) in  $\text{CH}_2\text{Cl}_2$  (0.5 mL) was added. The mixture was stirred at rt overnight (TLC control). Then, 1.5 mL of water was added and the mixture was stirred additional 15 min. Organic phase was separated, aqueous layer was washed with  $\text{CH}_2\text{Cl}_2$  (2 $\times$ 2.5 mL). Combined organic extracts were washed with brine, dried over anhydrous  $\text{Na}_2\text{SO}_4$  and concentrated in vacuum. The residue was subjected to a column chromatography on silica gel (eluent EtOAc–hexane, 1 : 7) to give 28 mg (34 %) of product **3c**. Further elution with EtOAc–hexane (1 : 3) gave 11 mg (13 %) of side product **4c**.

### Piperazine-1,4-diyl didodecanoate (**3c**)

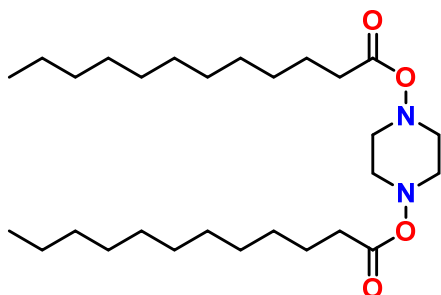

Pale-yellow semi-solid.  $R_f$  = 0.7 (hexane : EtOAc, 1:1).

$^1\text{H}$  NMR (300 MHz,  $\text{CDCl}_3$ , 300 K, HSQC, mixture of conformers/invertomers):  $\delta$  3.32 and 3.09 (2 br m, 8H, 4  $\text{CH}_2\text{N}$ ), 2.27 (t,  $J$  = 7.5 Hz, 4H, 2  $\text{CH}_2\text{-C}(\text{O})$ ), 1.62 (br q,  $J$  = 7.3 Hz, 4H, 2  $\text{CH}_2$ ), 1.26 (br m, 32H, 16  $\text{CH}_2$ ), 0.87 (t,  $J$  = 6.5 Hz, 6H, 2  $\text{CH}_3$ ).

$^{13}\text{C}$  NMR (75 MHz,  $\text{CDCl}_3$ , 300 K, HSQC, mixture of conformers/invertomers):  $\delta$  171.8 (2 C=O), 54.4 and 52.6 (2 br, 4  $\text{CH}_2\text{N}$ ), 33.1 (2  $\text{CH}_2\text{-C(O)}$ ), 32.0, 29.7, 29.6, 29.5, 29.3, 29.2, 25.2 and 22.8 (18  $\text{CH}_2$ ), 14.2 (2  $\text{CH}_3$ ).

ESI-HRMS  $m/z$ :  $[\text{M}+\text{H}]^+$  Calcd for  $[\text{C}_{28}\text{H}_{54}\text{N}_2\text{O}_4\text{Na}]^+$  505.3976; Found 505.3974.

### 1-(Dodecanoyl)-4-(dodecanoyloxy)piperazine (4c)

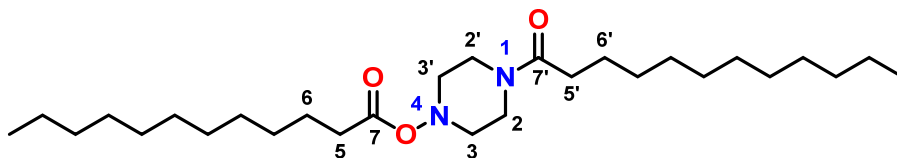

Pale-yellow oil.  $R_f$  = 0.5 (hexane : EtOAc, 1:1).

$^1\text{H}$  NMR (300 MHz,  $\text{CDCl}_3$ , 301 K, HSQC, COSY, mixture of conformers/invertomers):  $\delta$  4.44, 3.78, 3.48 and 3.13 (4 br m, 4H,  $\text{CH}_2\text{N-2}$  and  $\text{CH}_2\text{N-2'}$ ), 3.34 and 2.74 (2 br m, 4H,  $\text{CH}_2\text{N-3}$  and  $\text{CH}_2\text{N-3'}$ ), 2.34 – 2.24 (m, 4H,  $\text{CH}_2\text{-5}$  and  $\text{CH}_2\text{-5'}$ ), 1.65 – 1.60 (br m, 4H,  $\text{CH}_2\text{-6}$  and  $\text{CH}_2\text{-6'}$ ), 1.25 (br s, 32H,  $\text{CH}_2$ ), 0.88 (t,  $J$  = 6.4 Hz, 6H, 2  $\text{CH}_3$ ).

$^{13}\text{C}$  NMR (75 MHz,  $\text{CDCl}_3$ , HSQC, 298 K, mixture of conformers/invertomers):  $\delta$  171.81 and 171.78 (2 C=O), 56.1 and 55.8 ( $\text{CH}_2\text{N-3}$  and  $\text{CH}_2\text{N-3'}$ ), 43.8 and 40.0 ( $\text{CH}_2\text{N-2}$  and  $\text{CH}_2\text{N-2'}$ ), 33.3 and 33.1 ( $\text{CH}_2\text{-5}$  and  $\text{CH}_2\text{-5'}$ ), 32.0 (2  $\text{CH}_2$ ), 29.8 (2  $\text{CH}_2$ ), 29.7 (2  $\text{CH}_2$ ), 29.6 ( $\text{CH}_2$ ), 29.6 ( $\text{CH}_2$ ), 29.6 (2  $\text{CH}_2$ ), 29.5 (2  $\text{CH}_2$ ), 29.3 ( $\text{CH}_2$ ), 29.2 ( $\text{CH}_2$ ), 25.4 and 25.1 ( $\text{CH}_2\text{-6}$  and  $\text{CH}_2\text{-6'}$ ), 22.8 (2  $\text{CH}_2$ ), 14.3 (2  $\text{CH}_3$ ).

FT-IR (KBr): 2957 (m), 2920 (s), 2851 (s), 2387 (br, w), 2348 (w), 2292 (br, w), 1752 (m, C=O), 1645 (s, C=O), 1468 (m), 1455 (m), 1375 (w), 1278 (w), 1246 (w), 1219 (w), 1194 (w), 1143 (w), 1112 (w), 1081 (w), 1029 (s), 721 (w), 660 (br, w), 584 (br, w), 494 (br, w), 419 (w).

ESI-HRMS  $m/z$ :  $[\text{M}+\text{H}]^+$  Calcd for  $[\text{C}_{28}\text{H}_{55}\text{N}_2\text{O}_4]^+$  467.4207; Found 467.4200.

### Synthesis of 1,4-dihydropiperazine (PipzDiol 2)

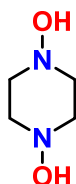

*Standard procedure.* To a solution of 1,4-dibenzoyloxypiperazine **3a** (1.0 equiv, 772 mg, 2.37 mmol) in dry  $\text{CHCl}_3$  (40 mL) was added hydrazine hydrate (10 equiv, 1.18 g, 23.6 mmol) under inert atmosphere. Reaction was refluxed until full

conversion of substrate **3a** was achieved (4 h, TLC control). Then, volatiles were removed under reduced pressure, and the residue was dried at ca. 0.5 Torr until constant weight to remove water and hydrazine. The resulting solid was triturated with CHCl<sub>3</sub> (7×10 mL) and dried in vacuum. In result, 235 mg (84 %) of PipzDiol **2** was obtained.

*Larger scale synthesis.* To a solution of 1,4-dibenzoyloxypiperazine **3a** (1 equiv, 1.84 g, 5.64 mmol) in dry CHCl<sub>3</sub> (94 mL) was added hydrazine hydrate (10 equiv, 2.82 g, 56.4 mmol) under inert atmosphere. Reaction was refluxed until full conversion of substrate **3a** was achieved (6 h, TLC control). Then, volatiles were removed under reduced pressure, and the residue was dried at ca. 0.5 Torr until constant weight to remove water and hydrazine. The resulting solid was triturated with CHCl<sub>3</sub> (7×20 mL) and dried in vacuum. In result, 235 mg (84 %) of PipzDiol **2** was obtained. In result, 396 mg (60 %) of PipzDiol **2** was obtained.

Pale grey solid. Mp = 205–207 °C (with decomposition).

At room temperature in solution (DMSO-*d*<sub>6</sub> or D<sub>2</sub>O), a dynamic mixture of *trans*-**2**/*cis*-**2** stereoisomers (ratio 2.2 : 1) is observed by NMR. Upon heating a coalescence of signals is observed (see section Dynamic NMR for details).

*Major isomer (trans-2):*

<sup>1</sup>H NMR (300 MHz, DMSO-*d*<sub>6</sub>, 300 K, HSQC): δ 7.93 (br s, 2H, OH), 2.95 (br d, 4H, CH<sub>2</sub>N), 2.51 (br d, 4H, CH<sub>2</sub>N).

<sup>13</sup>C NMR (75 MHz, DMSO-*d*<sub>6</sub>, 300 K): δ 56.9 (CH<sub>2</sub>N).

<sup>1</sup>H NMR (300 MHz, D<sub>2</sub>O, 298 K, HSQC, COSY, NOESY): δ 3.21 (br d, *J* = 7.4 Hz, 4H, CH<sub>2</sub>N), 2.72 (br d, *J* = 7.5 Hz, 4H, CH<sub>2</sub>N).

<sup>13</sup>C NMR (75 MHz, D<sub>2</sub>O, 300 K): δ 55.8 (CH<sub>2</sub>N).

*Minor isomer (cis-2):*

<sup>1</sup>H NMR (300 MHz, DMSO-*d*<sub>6</sub>, 300 K, HSQC): δ 7.93 (br s, 2H, OH), 2.75 (br m, 8H, CH<sub>2</sub>N).

<sup>1</sup>H NMR (300 MHz, D<sub>2</sub>O, 298 K, HSQC, COSY, NOESY): 3.14 – 3.01 (br m, 4H, CH<sub>2</sub>N), 3.00 – 2.95 (br m, 4H, CH<sub>2</sub>N).

<sup>13</sup>C NMR (75 MHz, D<sub>2</sub>O, 300 K): 52.3 (br, CH<sub>2</sub>N).

FT-IR: 3434 (br, w), 3244 (br, w), 3055 (w), 2976 (w), 2907 (w), 2863 (m), 1616 (br, w), 1463 (s), 1412 (m), 1359 (m), 1267 (s), 1106 (s), 1078 (w), 1062 (s), 953 (s), 819 (s), 778 (s), 622 (s), 464 (s).

Anal. calcd for  $2 \cdot (1/6)H_2O$ : C, 39.66; H, 8.60; N, 23.13. Found: C, 39.59; H, 8.50; N, 23.24.

ESI-HRMS  $m/z$ :  $[M-H]^+$  Calcd for  $[C_4H_{11}N_2O_2]^+$  119.0815; Found 119.0819.

### 1,4-Dihydroxypiperazine-1,4-diium sulfate $[H_2(2)]^{2+}[SO_4]^{2-}$

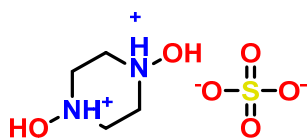

Into a round bottom flask were placed 1,4-dihydroxypiperazine **2** (1 equiv, 20 mg, 0.17 mmol),  $H_2O$  (1 mL) and MeOH (1 mL). Sulfuric acid (2 equiv, 94 %, 35 mg, 0.02 mL, 0.34 mmol) was added dropwise. After the addition of  $H_2SO_4$  the precipitate immediately formed. The mixture was heated to reflux (most of the precipitate dissolved) and filtered. The solution was kept at ca. 5 °C, and the resulting crystals of salt  $[H_2(2)]^{2+}[SO_4]^{2-}$  were collected (27 mg, 74 % yield). The crystals were used for X-Ray analysis (see section X-Ray analysis for details).

Colorless crystals. Mp = 191–192 °C (MeOH/ $H_2O$ , with decomposition).

At room temperature in  $D_2O$  solution a dynamic mixture of *trans/cis* stereoisomers is observed (ratio 1 : 1.2).

#### Major isomer (*trans*):

$^1H$  NMR (300 MHz,  $D_2O$ , 300 K, HSQC):  $\delta$  3.70 – 3.62 (br m, 8H).

$^{13}C$  NMR (75 MHz,  $D_2O$ , 298 K):  $\delta$  50.7 ( $CH_2N$ ).

#### Minor isomer (*cis*):

$^1H$  NMR (300 MHz,  $D_2O$ , 300 K, HSQC):  $\delta$  4.02 (br d,  $J$  = 10.4 Hz, 4H,  $CH_2N$ ), 3.51 (br d,  $J$  = 10.4 Hz, 4H,  $CH_2N$ ).

$^{13}C$  NMR (75 MHz,  $D_2O$ , 298 K):  $\delta$  48.9 (br  $CH_2N$ ).

FT-IR (KBr): 3437 (br w), 3026 (w), 2987 (w), 2608 (br w), 2511 (br), 1639 (br), 1549 (m), 1482 (m), 1458 (m), 1383 (w), 1332 (w), 1297 (w), 1236 (m), 1198 (s), 1110 (s), 1035 (s), 1001 (s), 957 (s), 877 (m), 829 (m), 703 (w), 638 (s), 596 (s), 494 (w), 452 (w), 433 (m).

### 1,4-Dihydroxypiperazine-1,4-dium oxalate monohydrate $[H_2(2)]^{2+}[Ox]^{2-} \cdot H_2O$

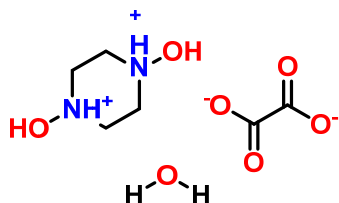

Into a round bottom flask were placed 1,4-dihydroxypiperazine **2** (1 equiv, 15 mg, 0.127 mmol), H<sub>2</sub>O (0.5 mL) and MeOH (0.5 mL). Then, a solution of oxalic acid dihydrate (1 equiv, 16 mg, 0.127 mmol) in MeOH/H<sub>2</sub>O (0.5 mL/0.5 mL) was added. The precipitate was immediately formed. The mixture was heated to reflux (most of the precipitate dissolved) and filtered. The solution was kept at ca. 5 °C, and the resulting crystals of salt  $[H_2(2)]^{2+}[Ox]^{2-} \cdot H_2O$  were collected (13 mg, 45 % yield). The crystals were used for X-Ray analysis (see section X-Ray analysis for details).

Colorless crystals. Mp = 182–183°C (MeOH/H<sub>2</sub>O, with decomposition).

At room temperature in D<sub>2</sub>O solution a dynamic mixture of *trans/cis* stereoisomers is observed (ratio 1.1 : 1.0).

*Major isomer (cis):*

<sup>1</sup>H NMR (300 MHz, D<sub>2</sub>O, 298 K, HSQC): δ 3.57 – 3.50 (br m, 4H, CH<sub>2</sub>N), 3.45 – 3.39 (br m, 4H, CH<sub>2</sub>N).

<sup>13</sup>C NMR (75 MHz, D<sub>2</sub>O, 298 K): δ 165.6 (CO), 51.2 (br CH<sub>2</sub>N).

*Minor isomer (trans):*

<sup>1</sup>H NMR (300 MHz, D<sub>2</sub>O, 298 K, HSQC): δ 3.72 (br d, *J* = 10.1 Hz, 4H, CH<sub>2</sub>N), 3.21 (br d, *J* = 10.1 Hz, 4H, CH<sub>2</sub>N).

<sup>13</sup>C NMR (75 MHz, D<sub>2</sub>O, 298 K): δ 165.6 (CO), 51.2 (br CH<sub>2</sub>N).

### Adduct of 1,4-dihydroxypiperazine and 4-aminobenzoic acid **2•2PABA**

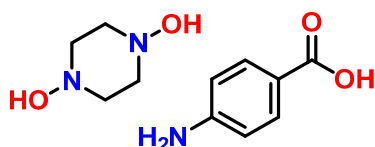

Into a round bottom flask were placed 1,4-dihydroxypiperazine **2** (1 equiv, 20 mg, 0.17 mmol), H<sub>2</sub>O (0.5 mL) and MeOH (0.5 mL). Then, a solution of 4-aminobenzoic acid (2 equiv, 46 mg, 0.34 mmol) in MeOH/H<sub>2</sub>O (0.5 mL/0.5 mL) was added. The mixture was heated to reflux and filtered. The solution was kept at ca. 5 °C, and the resulting needle crystals of adduct **2•2PABA** were collected (41 mg, 62 %). The crystals were used for X-Ray analysis (see section X-Ray analysis for details).

Colorless crystals. Mp = 159–160 °C (MeOH/H<sub>2</sub>O, with decomposition).

Upon dissolution of **2**•2PABA in DMSO-d<sub>6</sub>, dissociation to 1,4-dihydropiperazine and *p*-aminobenzoic acid was observed by <sup>1</sup>H and <sup>13</sup>C NMR.

## Spectra of products

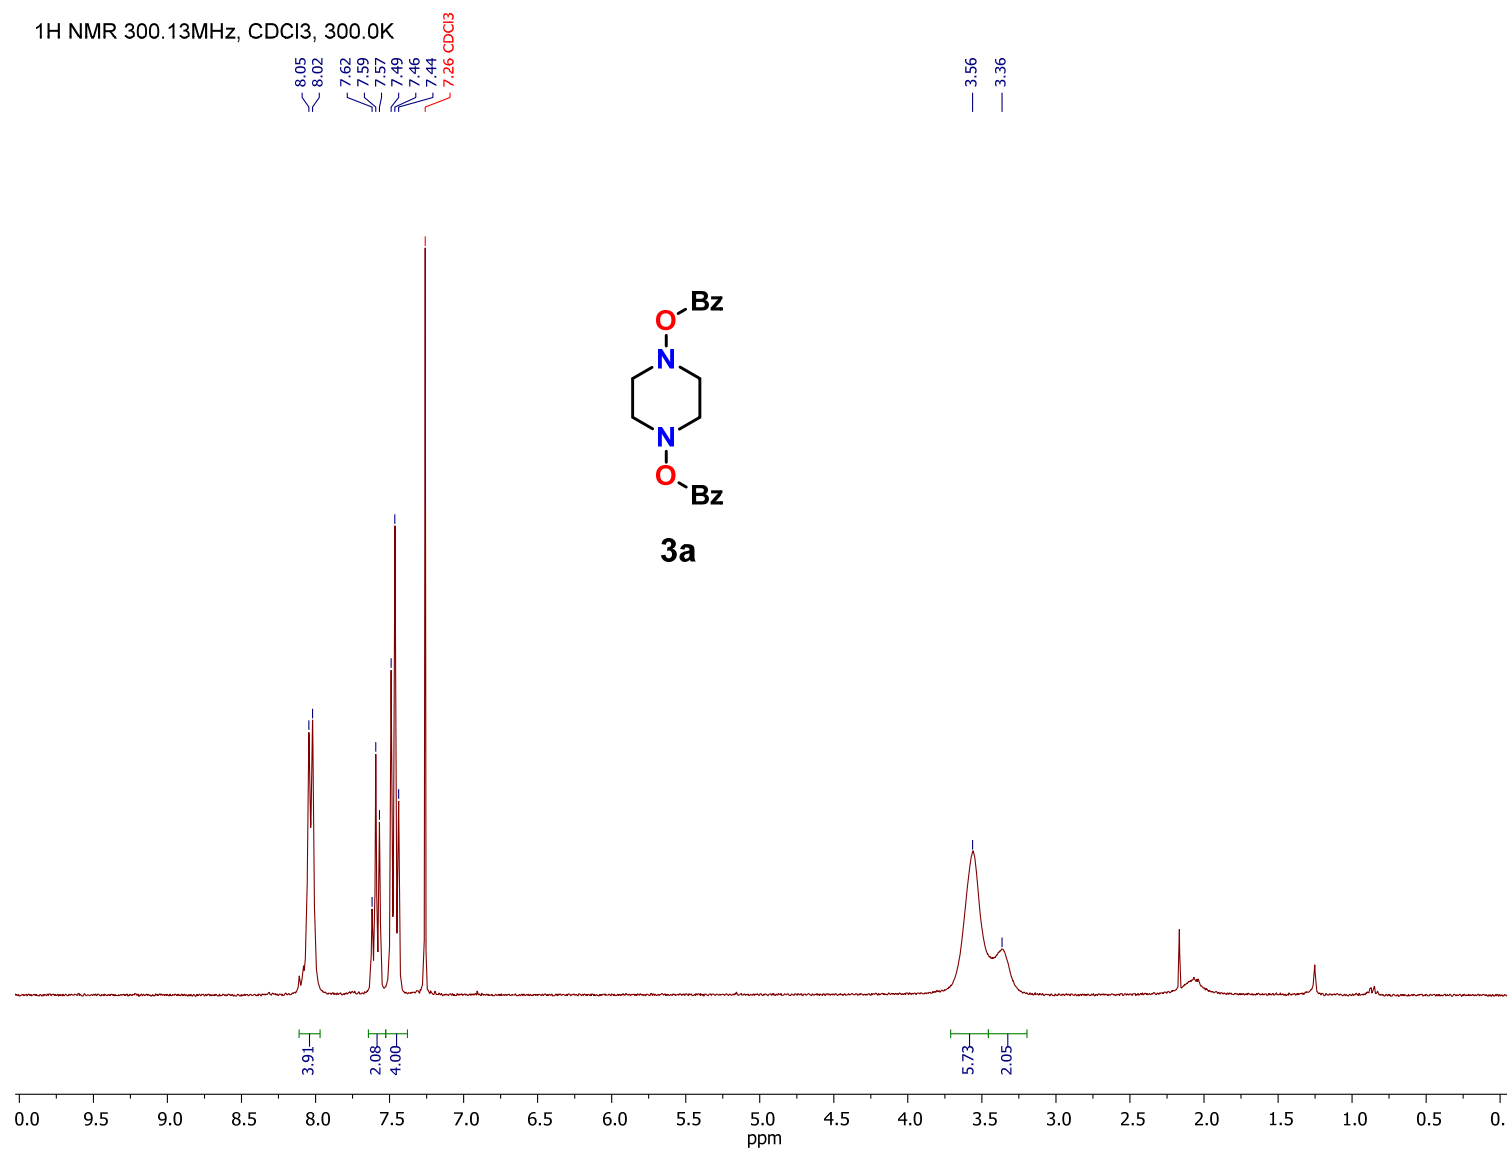

$^{13}\text{C}$  NMR 75.48MHz,  $\text{CDCl}_3$ , 300.1K

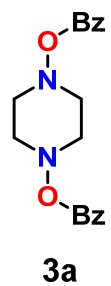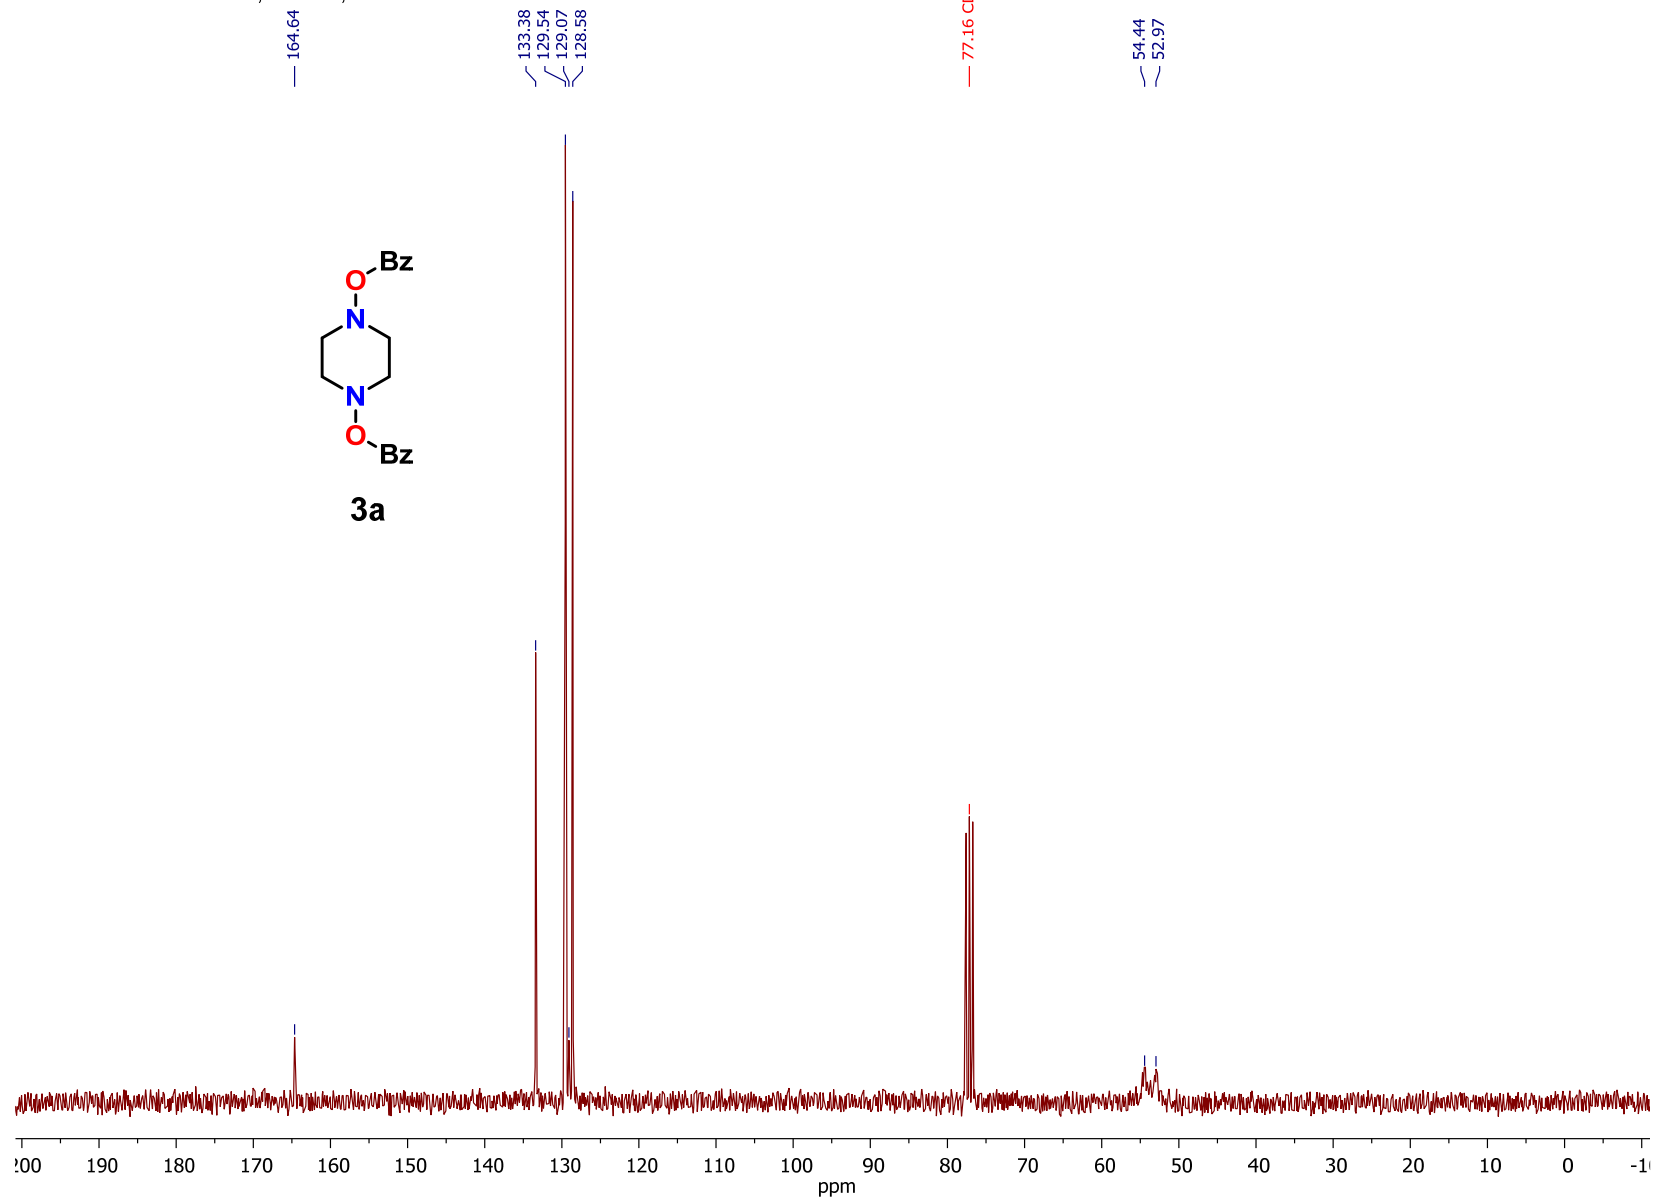

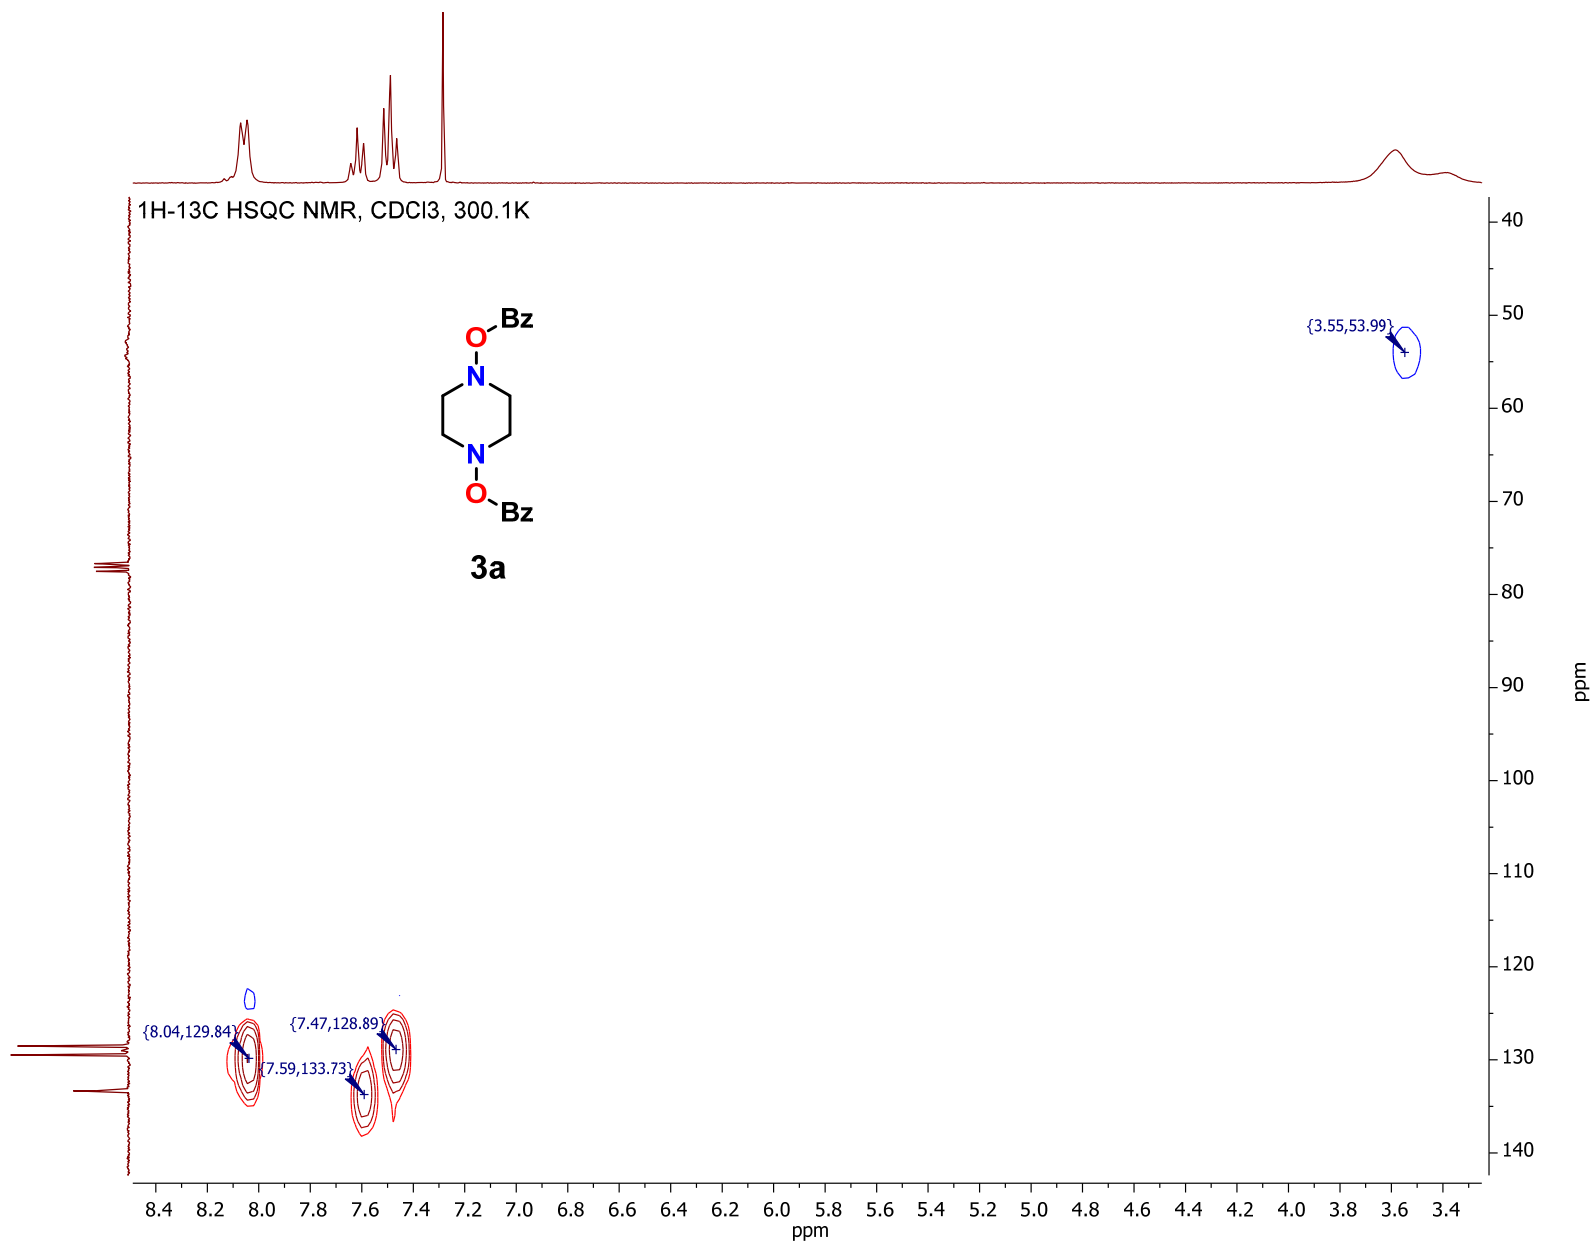

<sup>1</sup>H NMR 300.13MHz, CDCl<sub>3</sub>, 300.0K

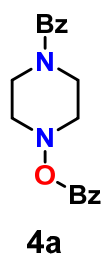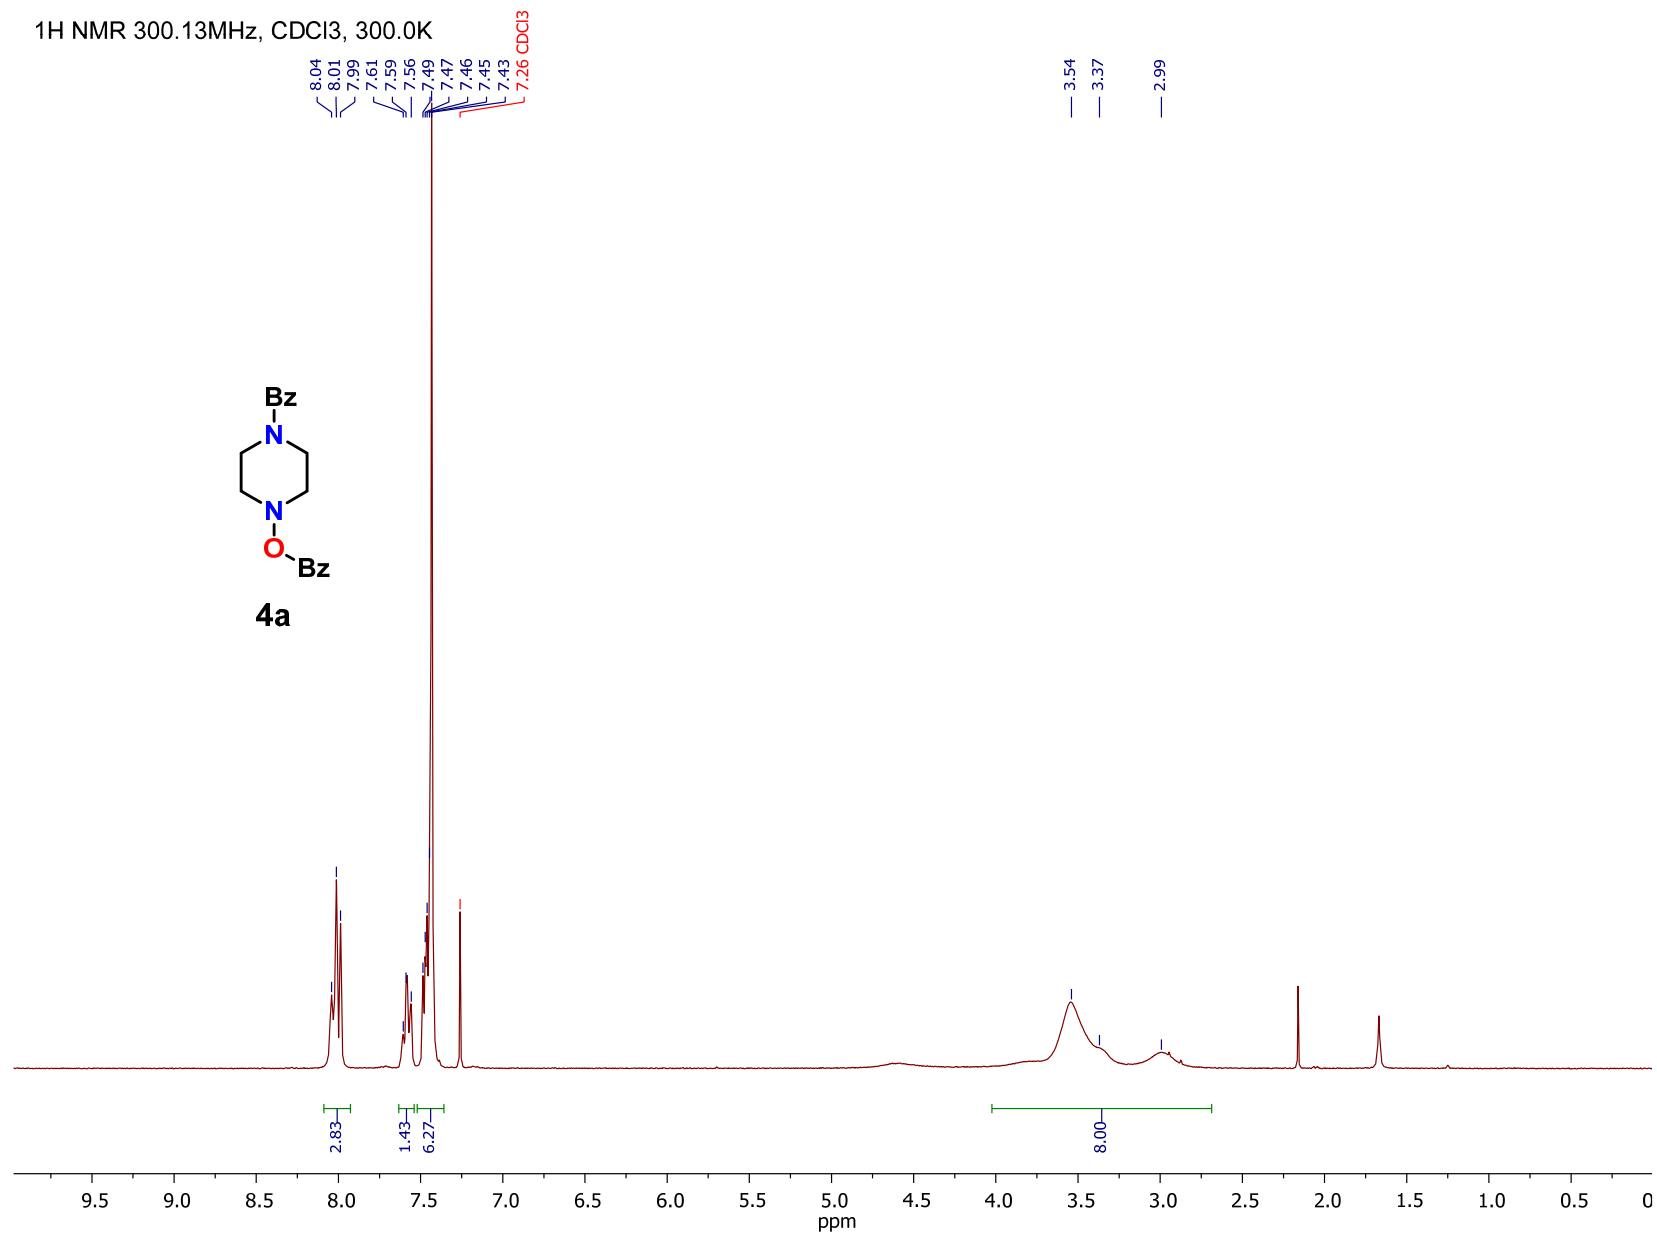

$^{13}\text{C}$  NMR 75.48MHz,  $\text{CDCl}_3$ , 300.0K

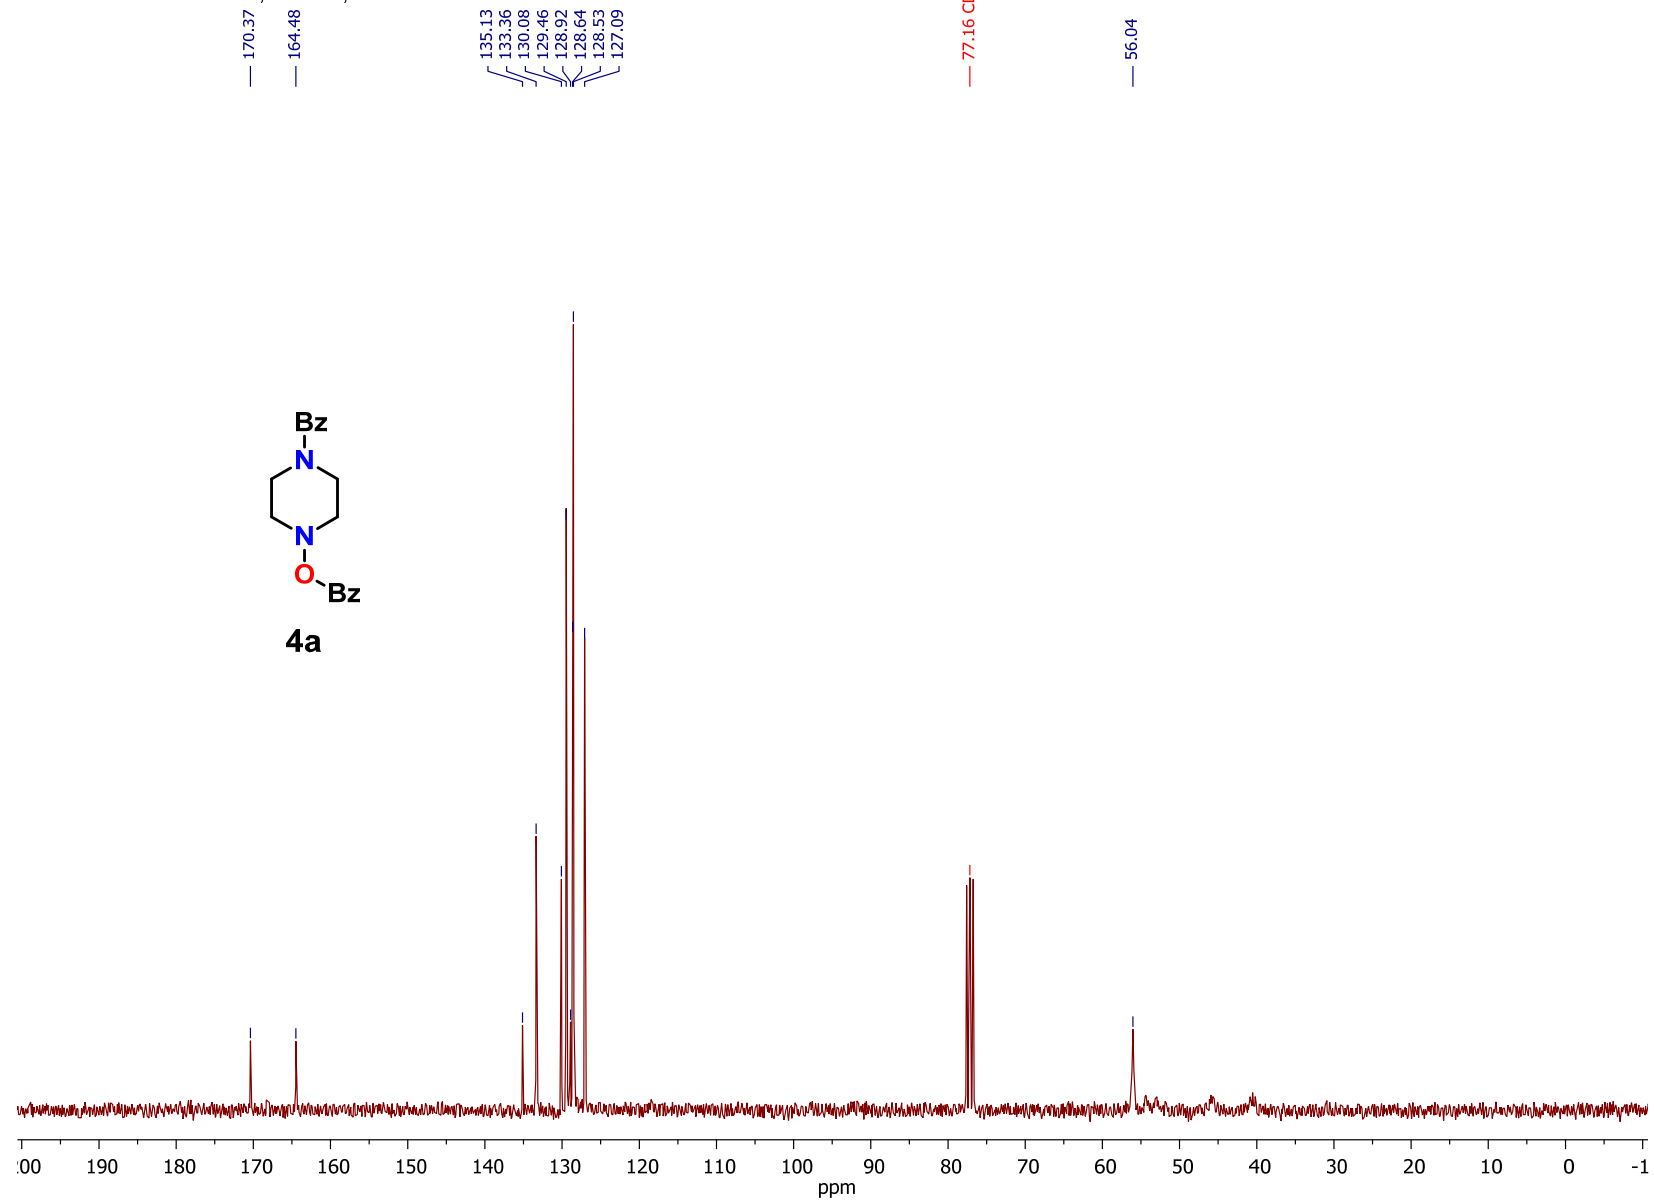

S16

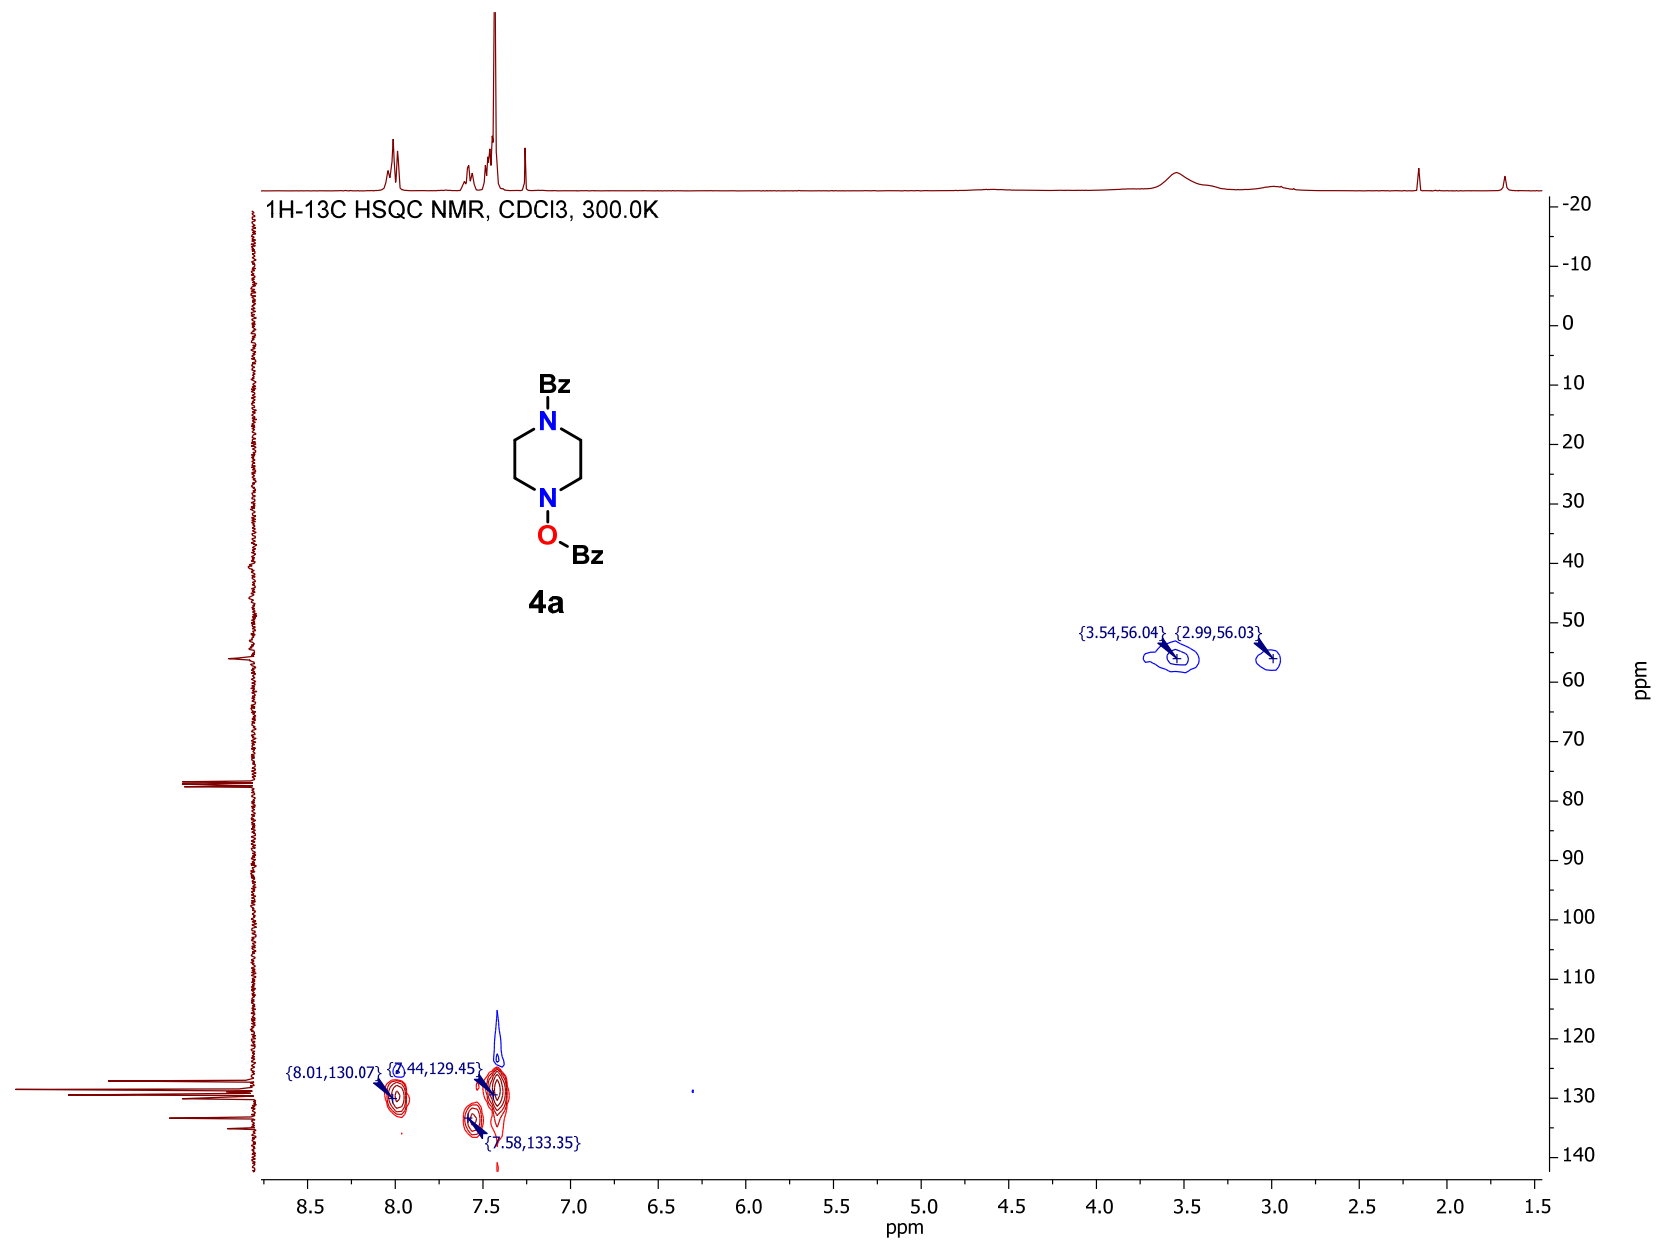

1H NMR 300.13MHz, CDCl3, 300.0K

— 7.26 CDCl3

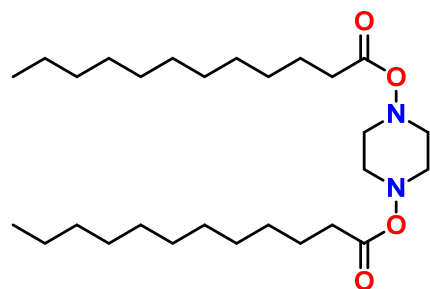

3c

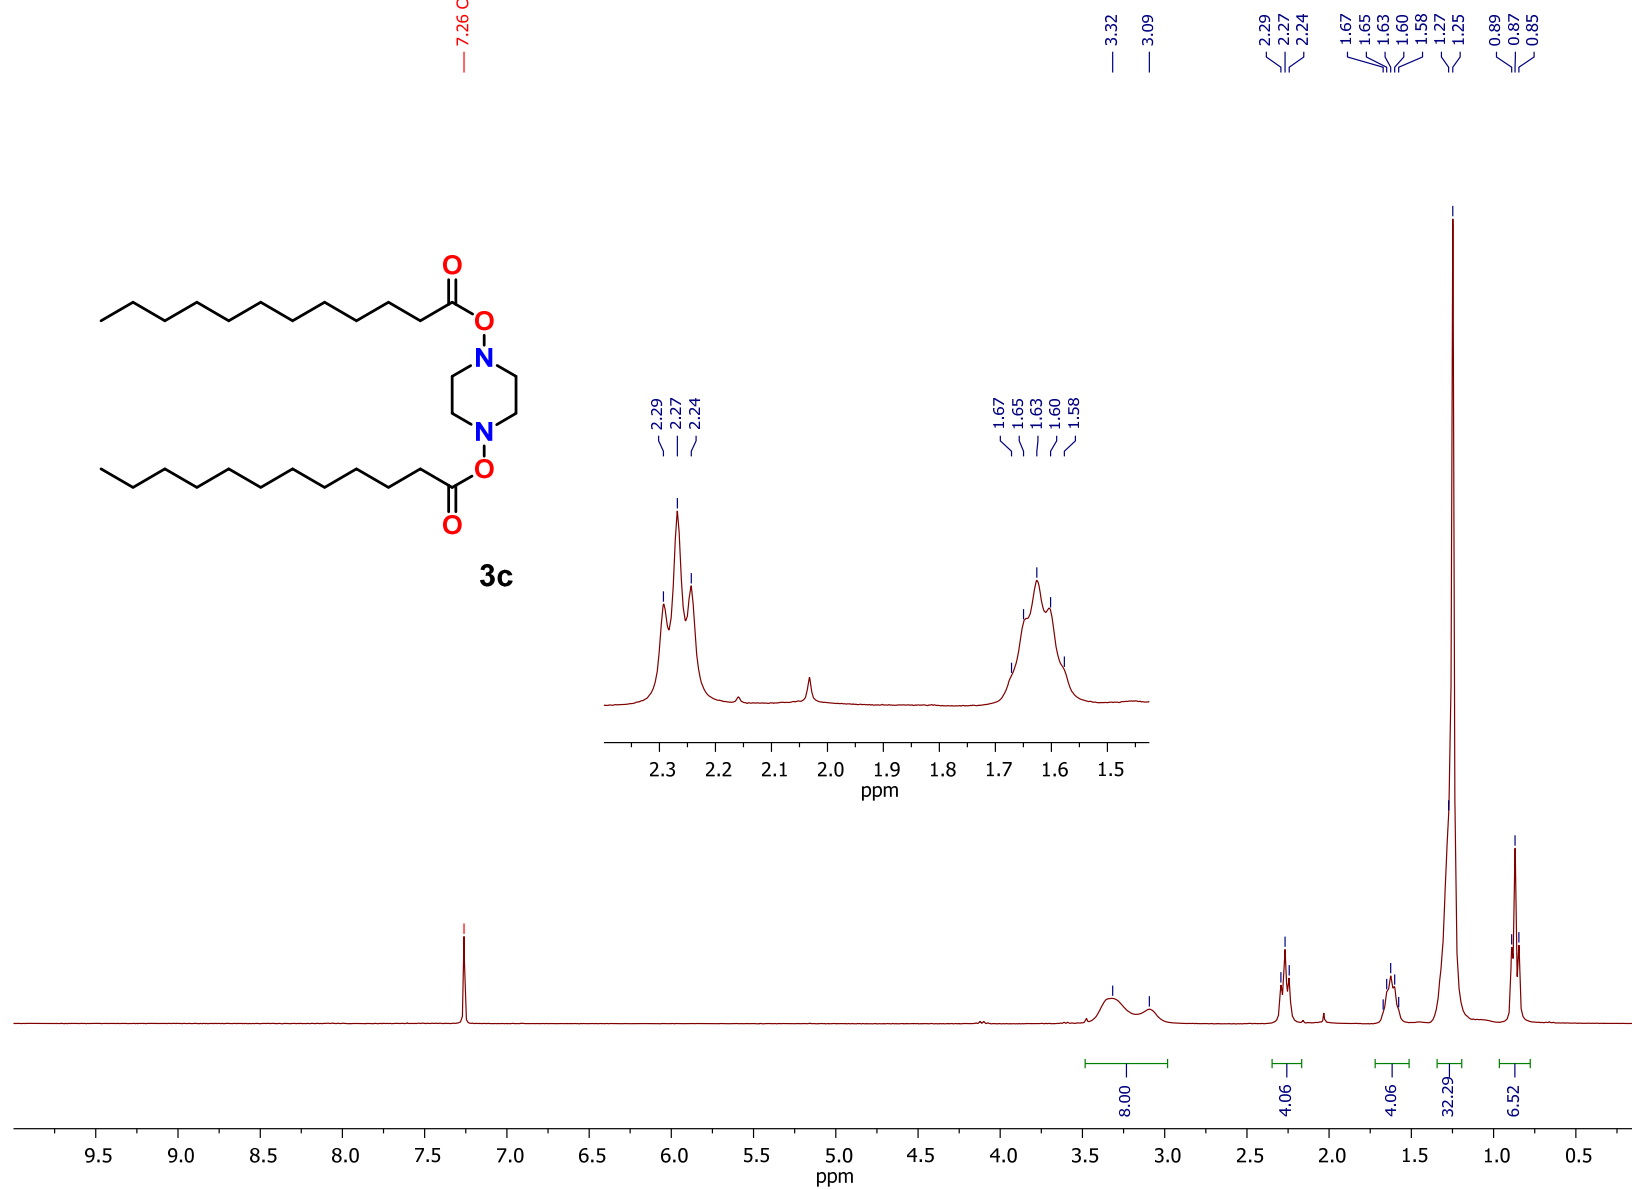

<sup>13</sup>C NMR 75.48MHz, CDCl<sub>3</sub>, 300.1K

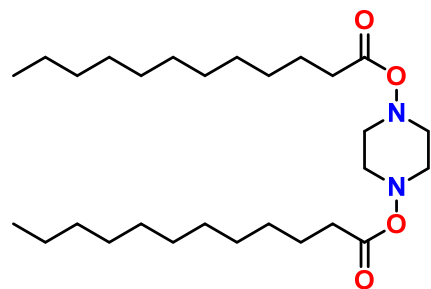

**3c**

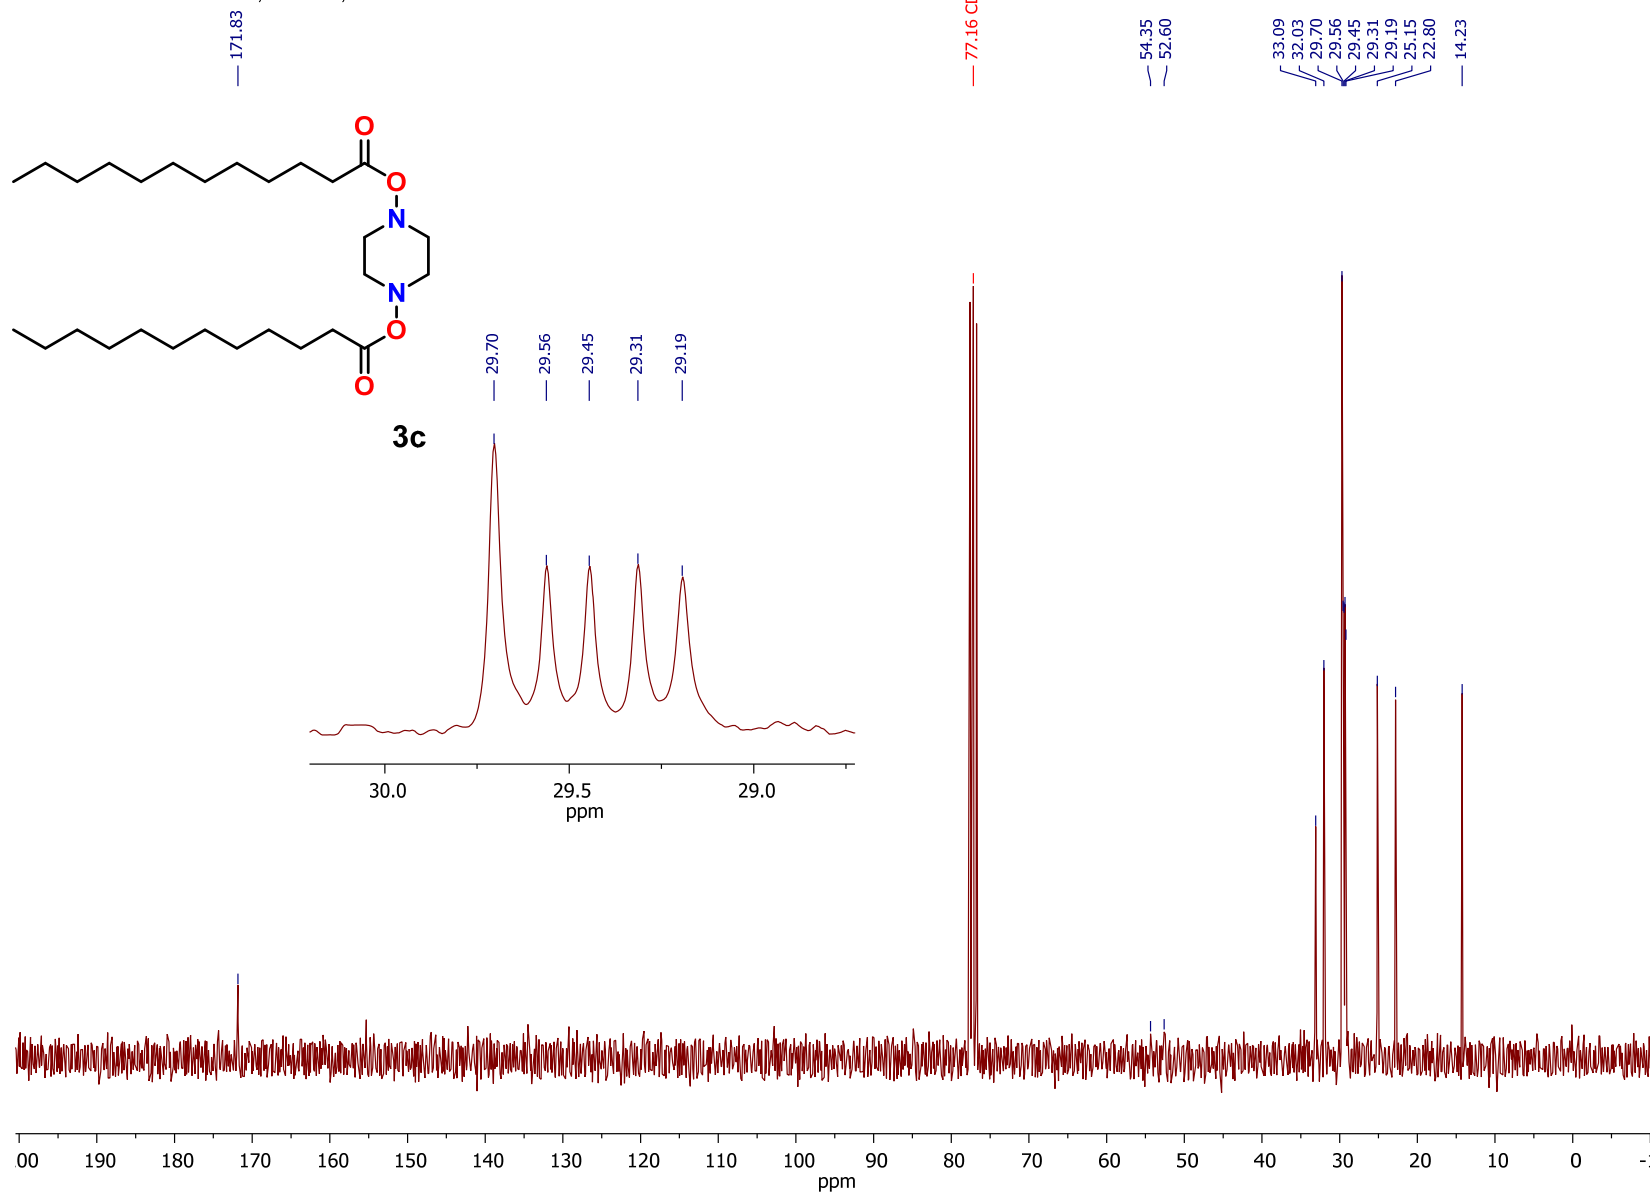

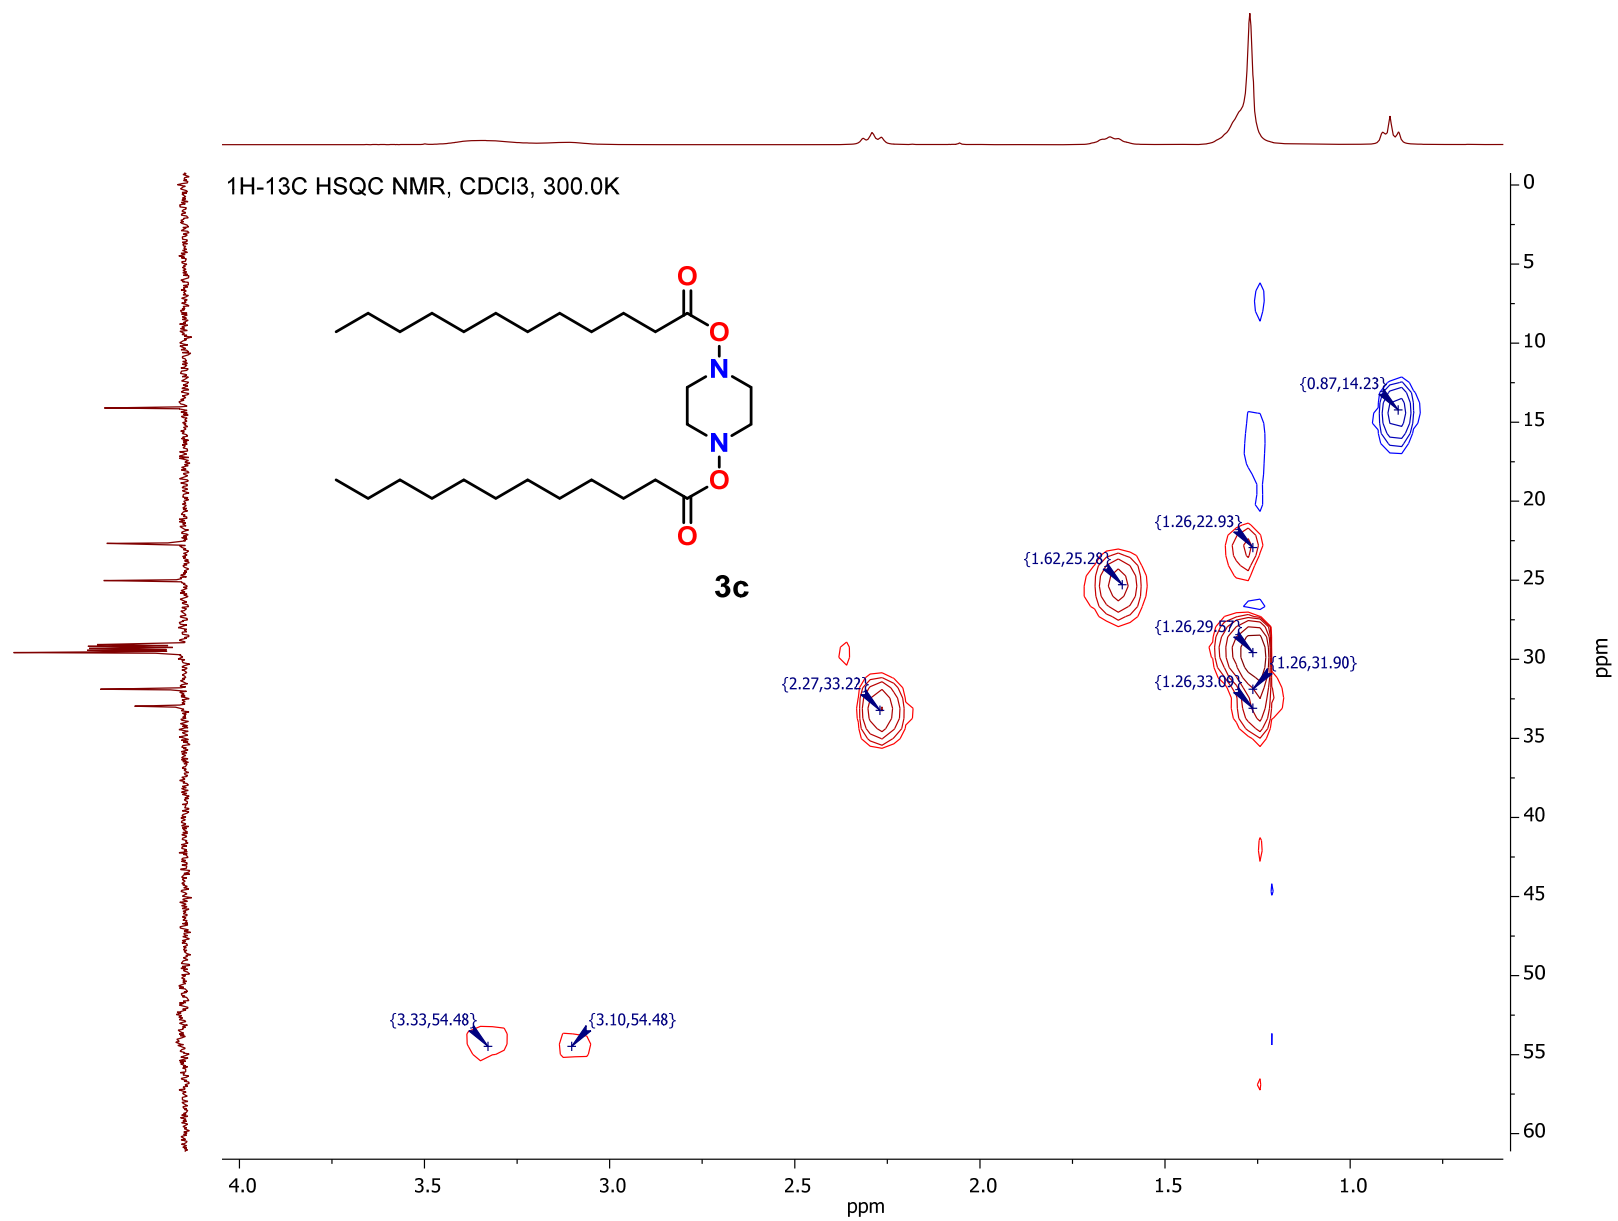

<sup>1</sup>H NMR 300.13MHz, CDCl<sub>3</sub>, 300.6K

— 7.26 CDCl<sub>3</sub>

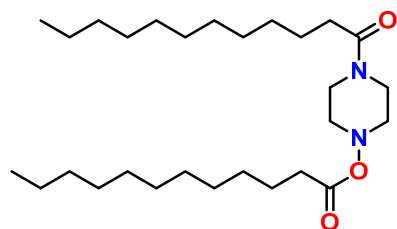

**4c**

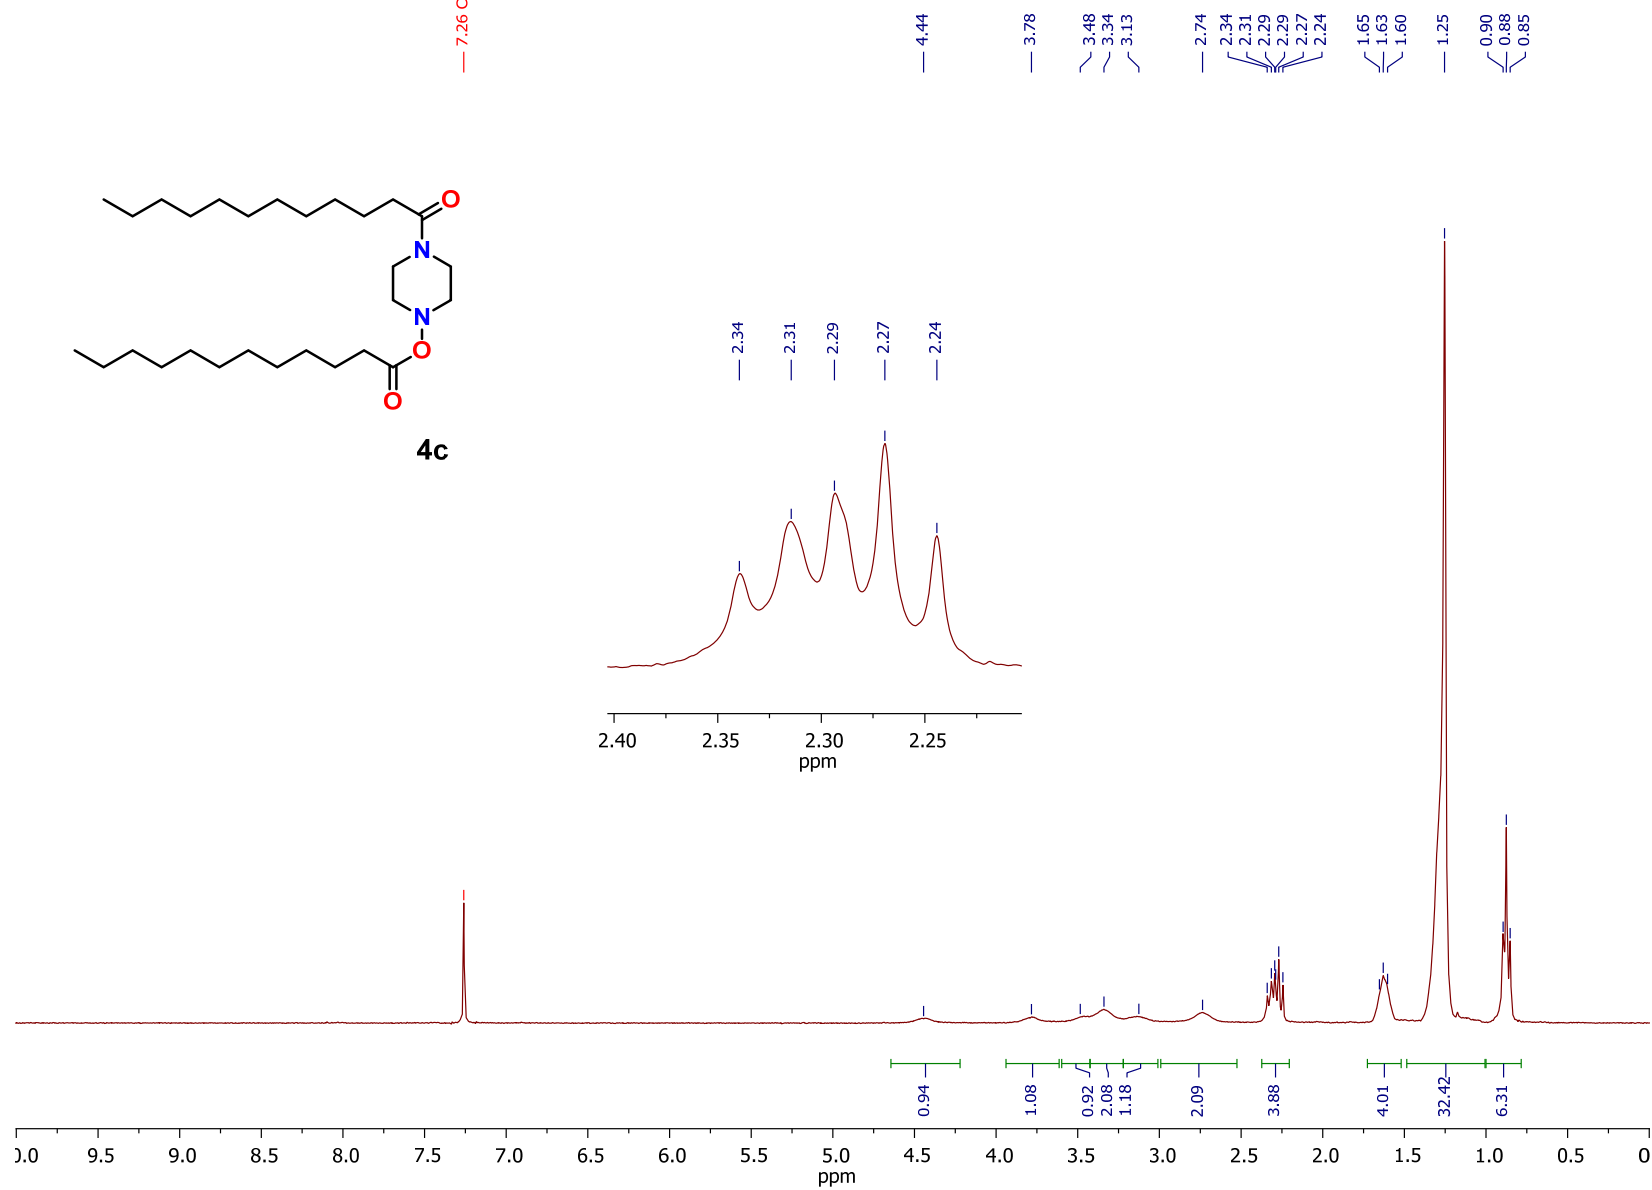

<sup>13</sup>C NMR 75.50MHz, CDCl<sub>3</sub>, 298.0K

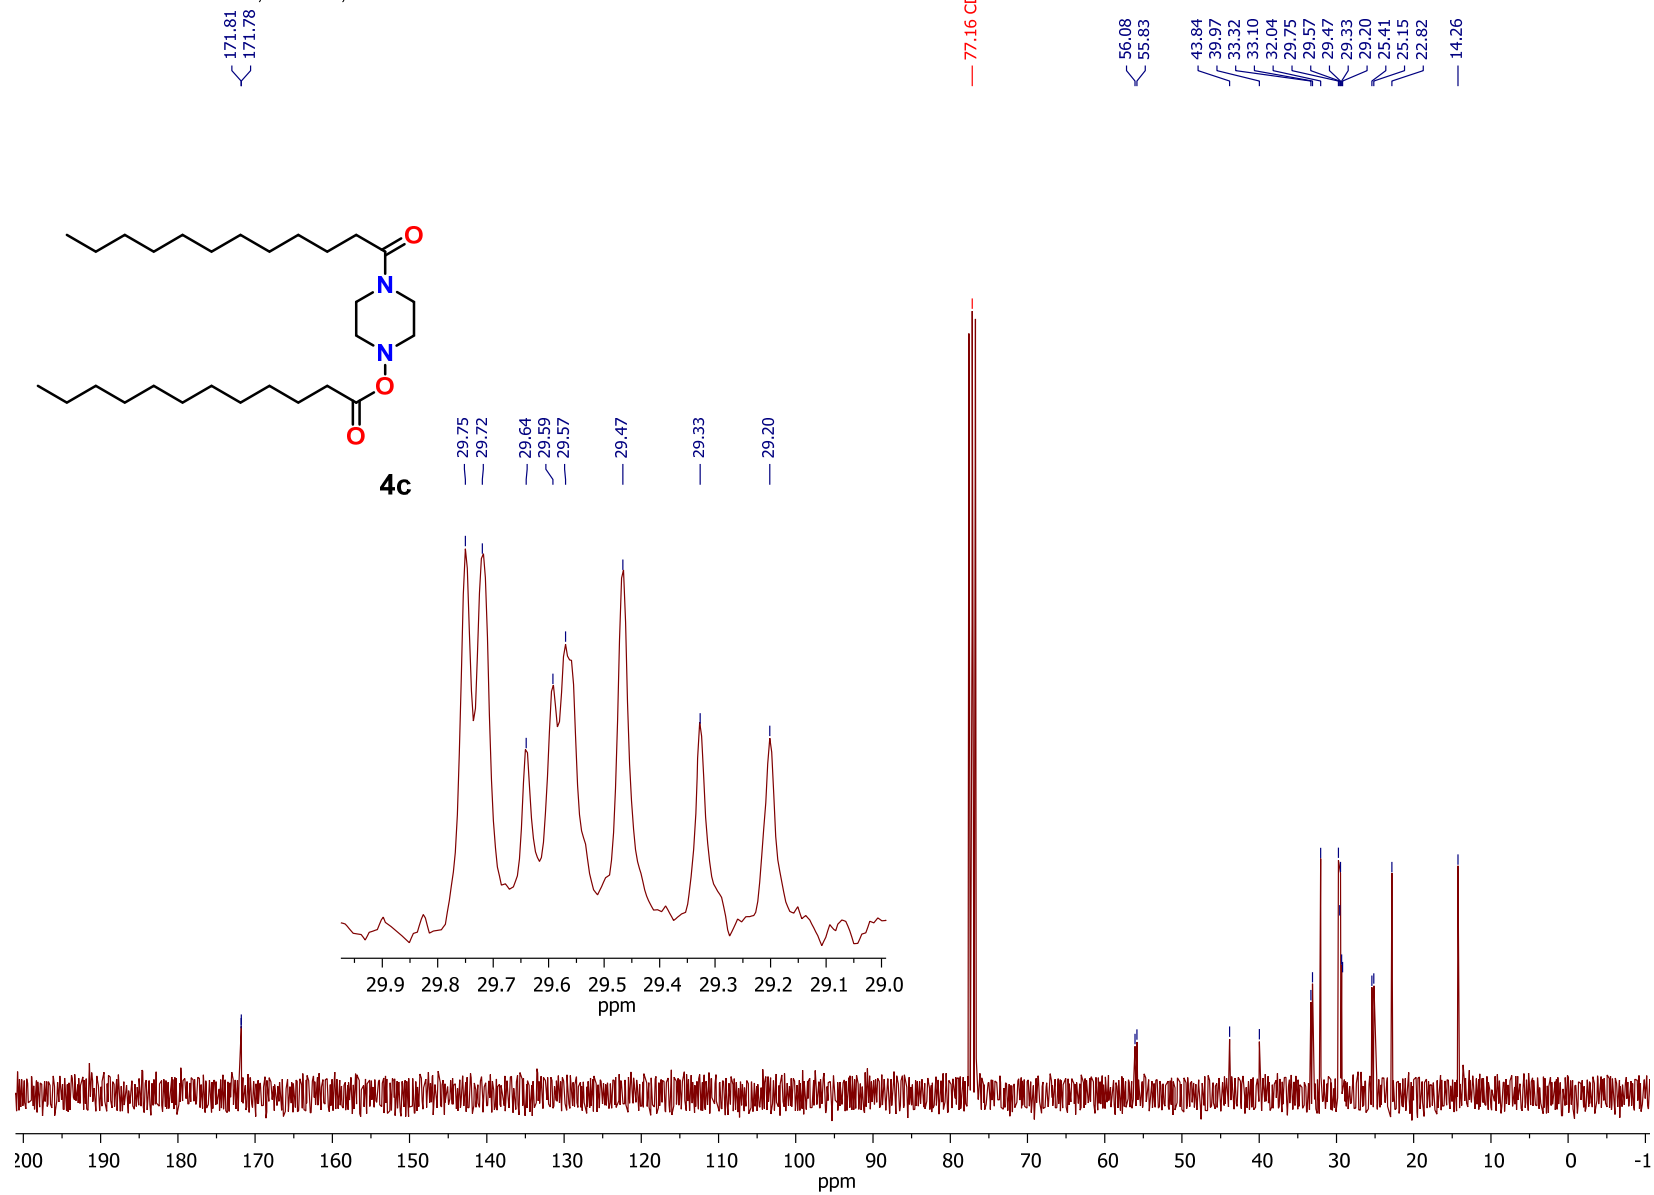

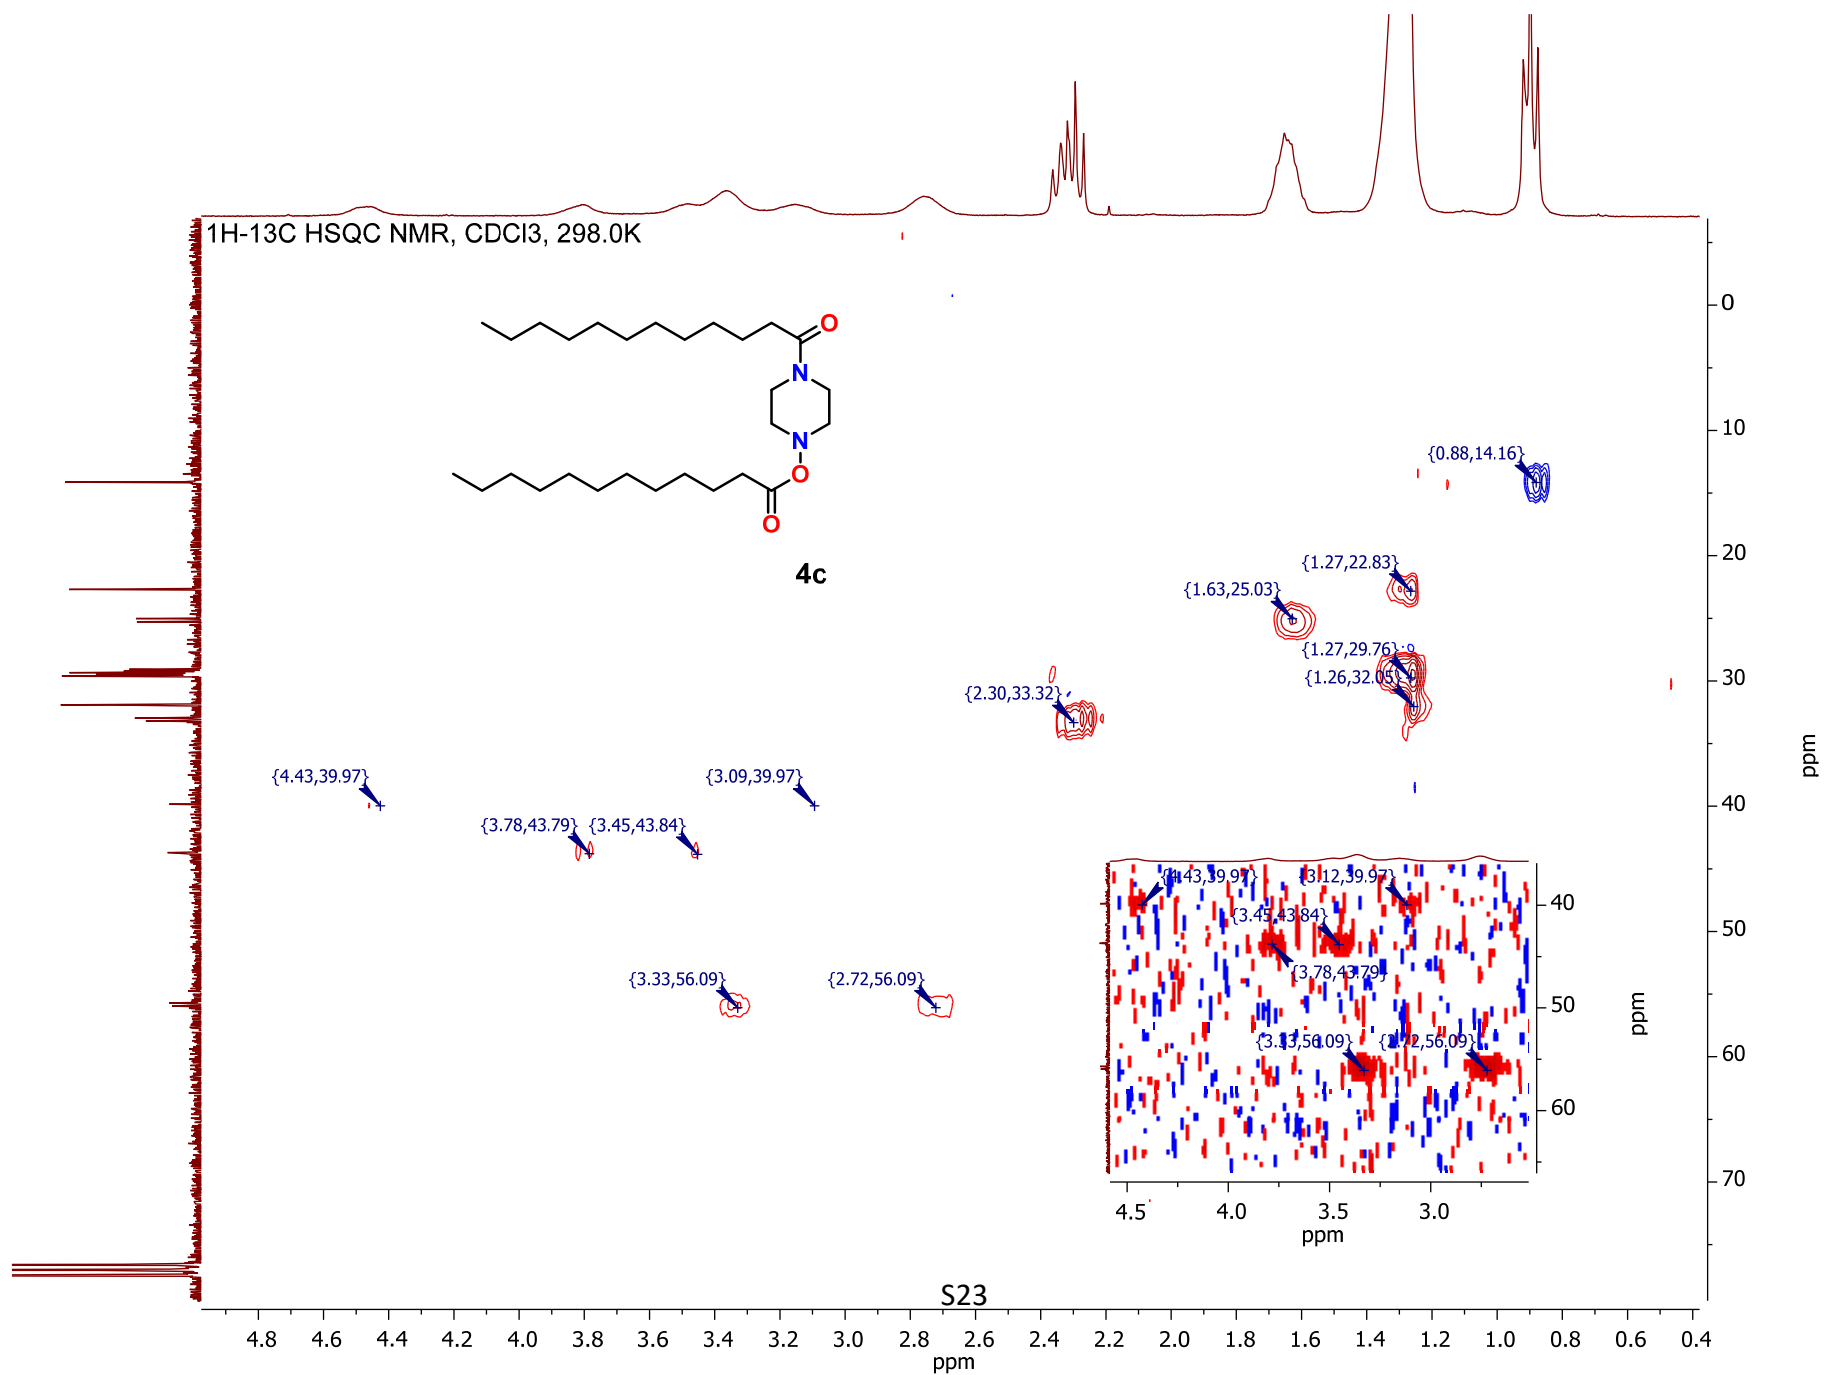

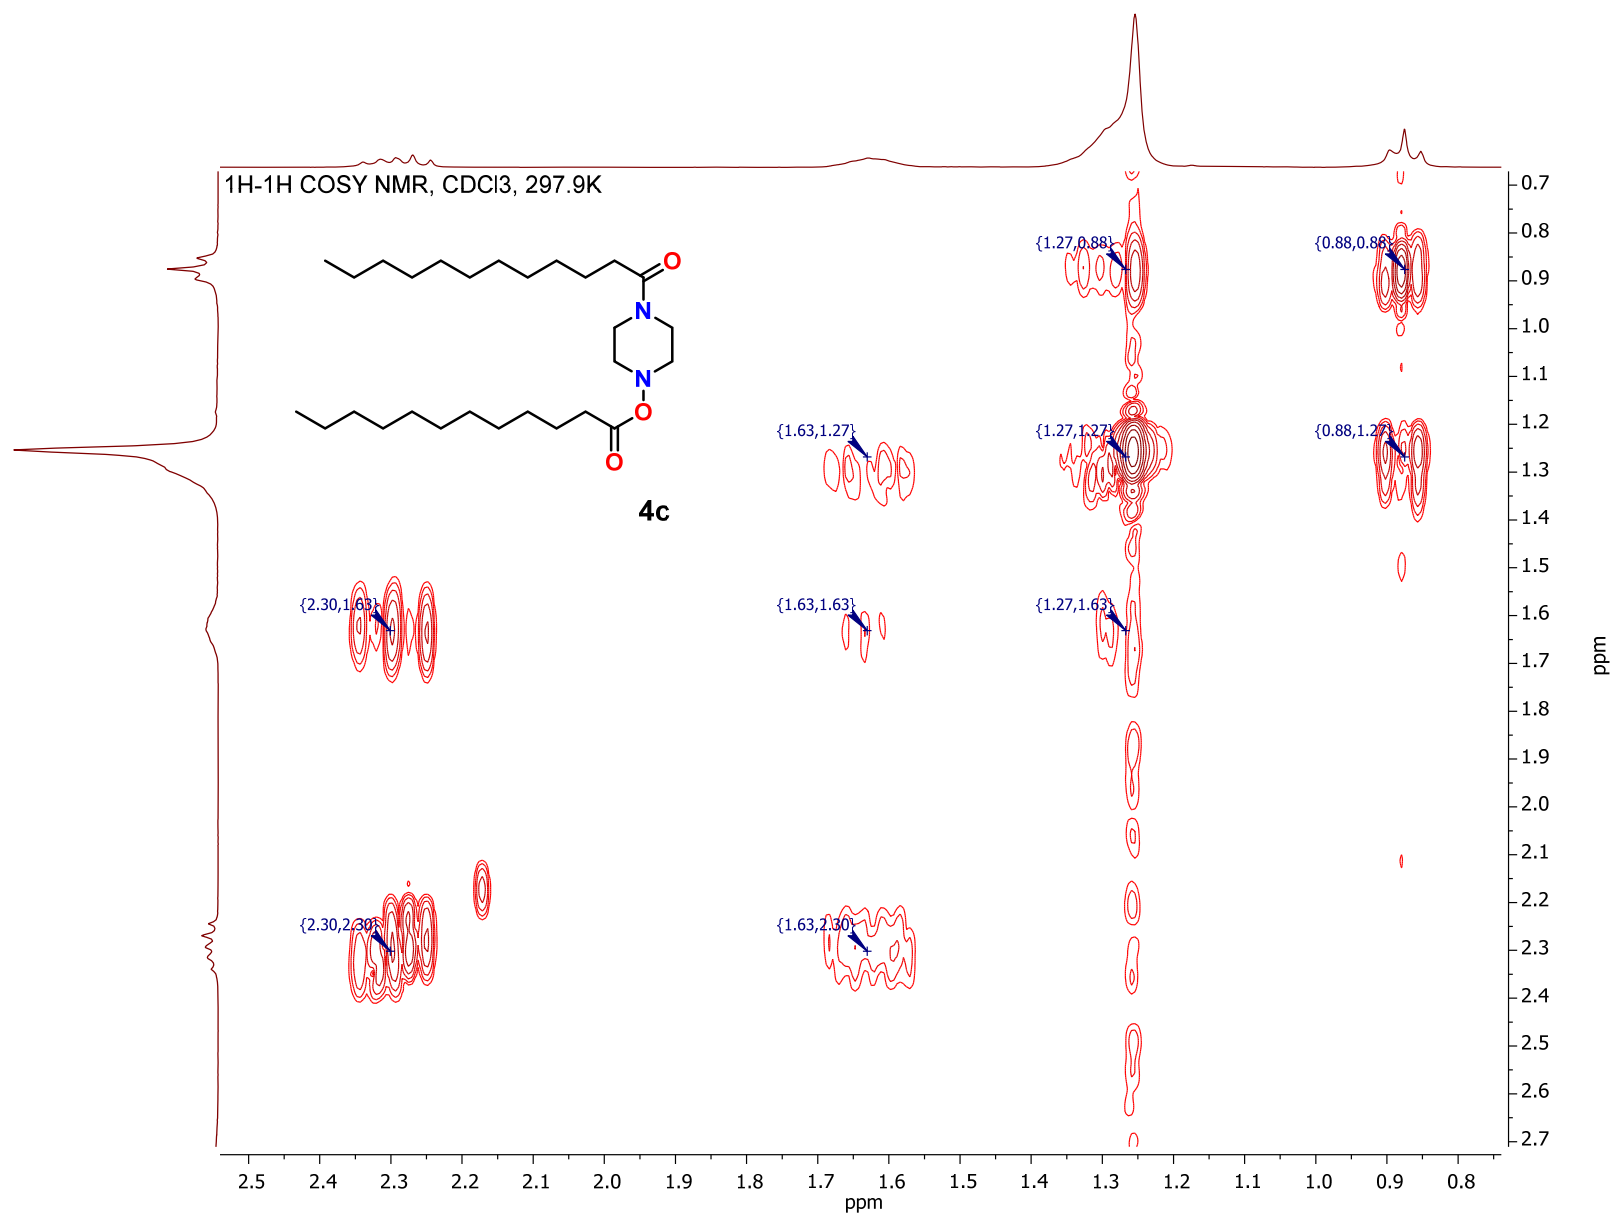

<sup>1</sup>H NMR 300.23MHz, CDCl<sub>3</sub>, 298.0K

— 7.26 CDCl<sub>3</sub>

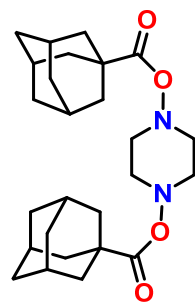

**3b**

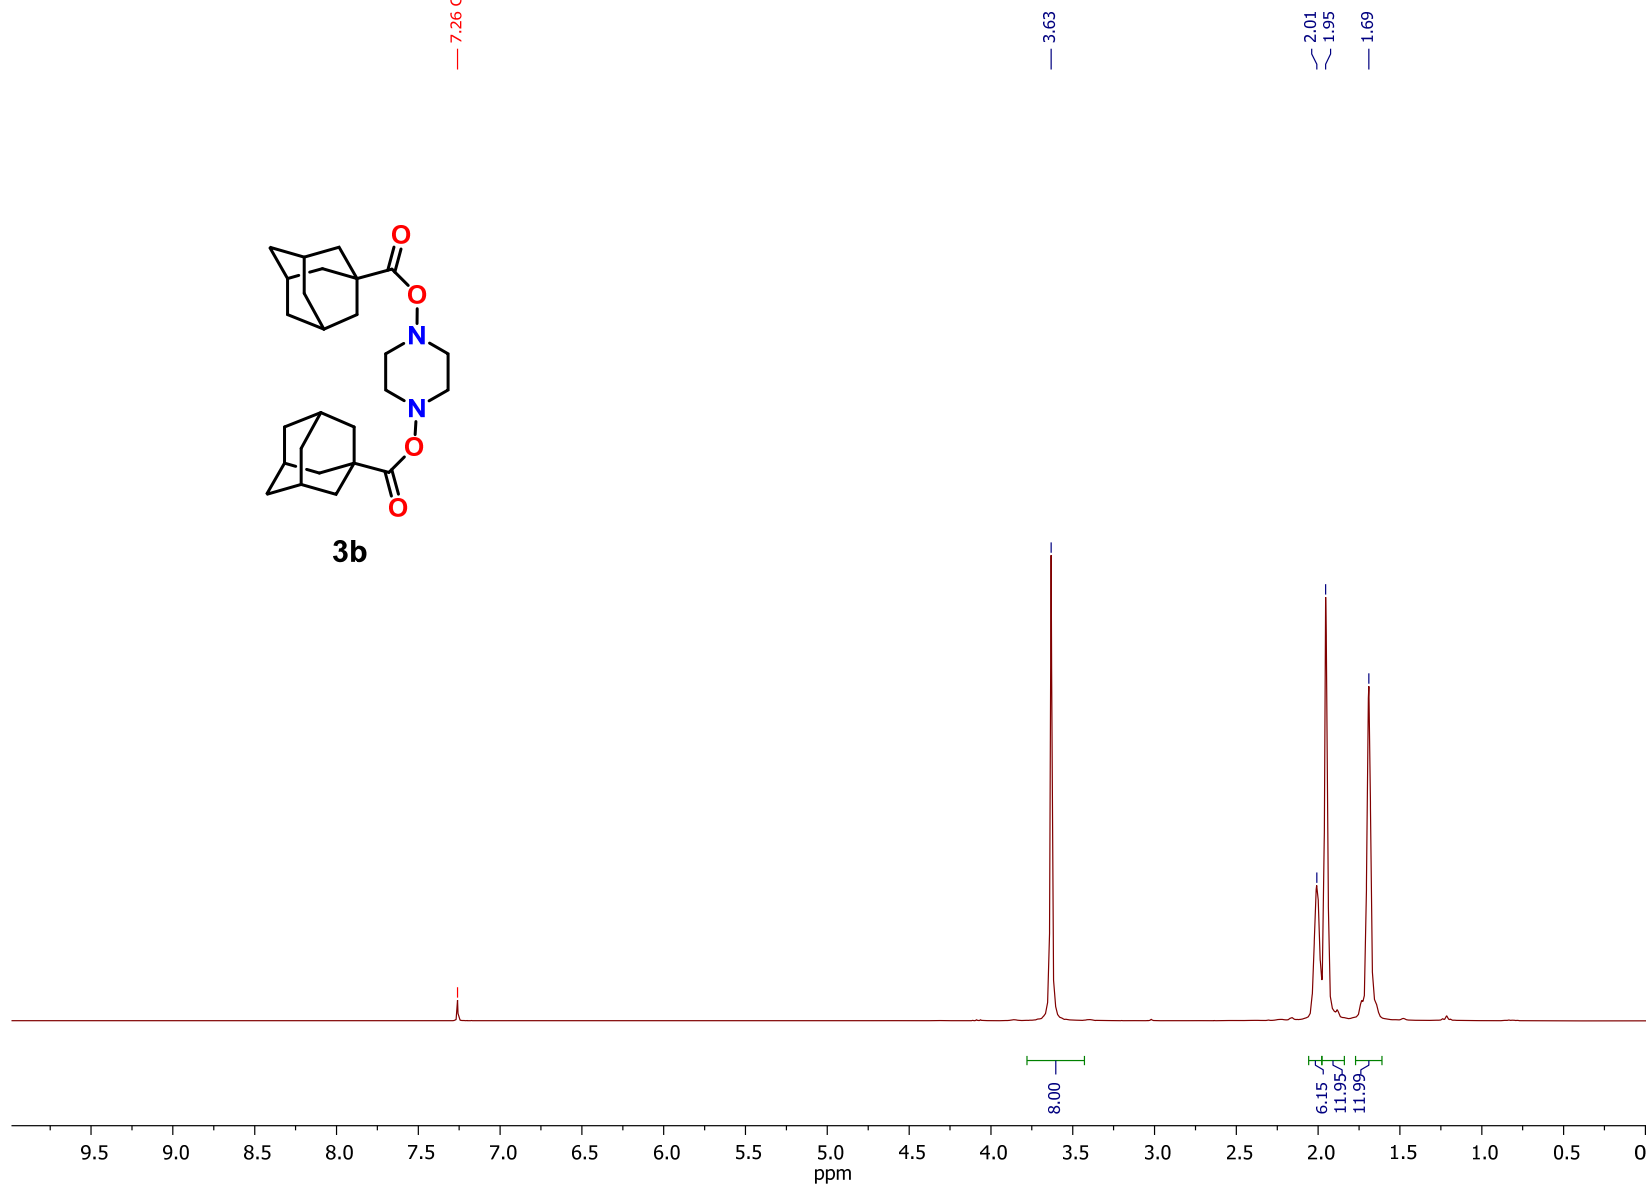

<sup>13</sup>C NMR 75.50MHz, CDCl<sub>3</sub>, 298.0K

— 176.07

— 77.16 CDCl<sub>3</sub>

~ 45.51

~ 41.75

~ 39.05

~ 36.59

— 28.44

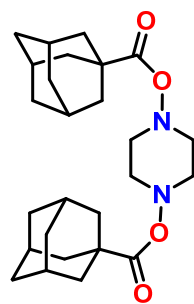

**3b**

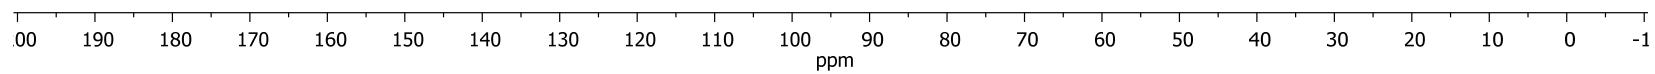

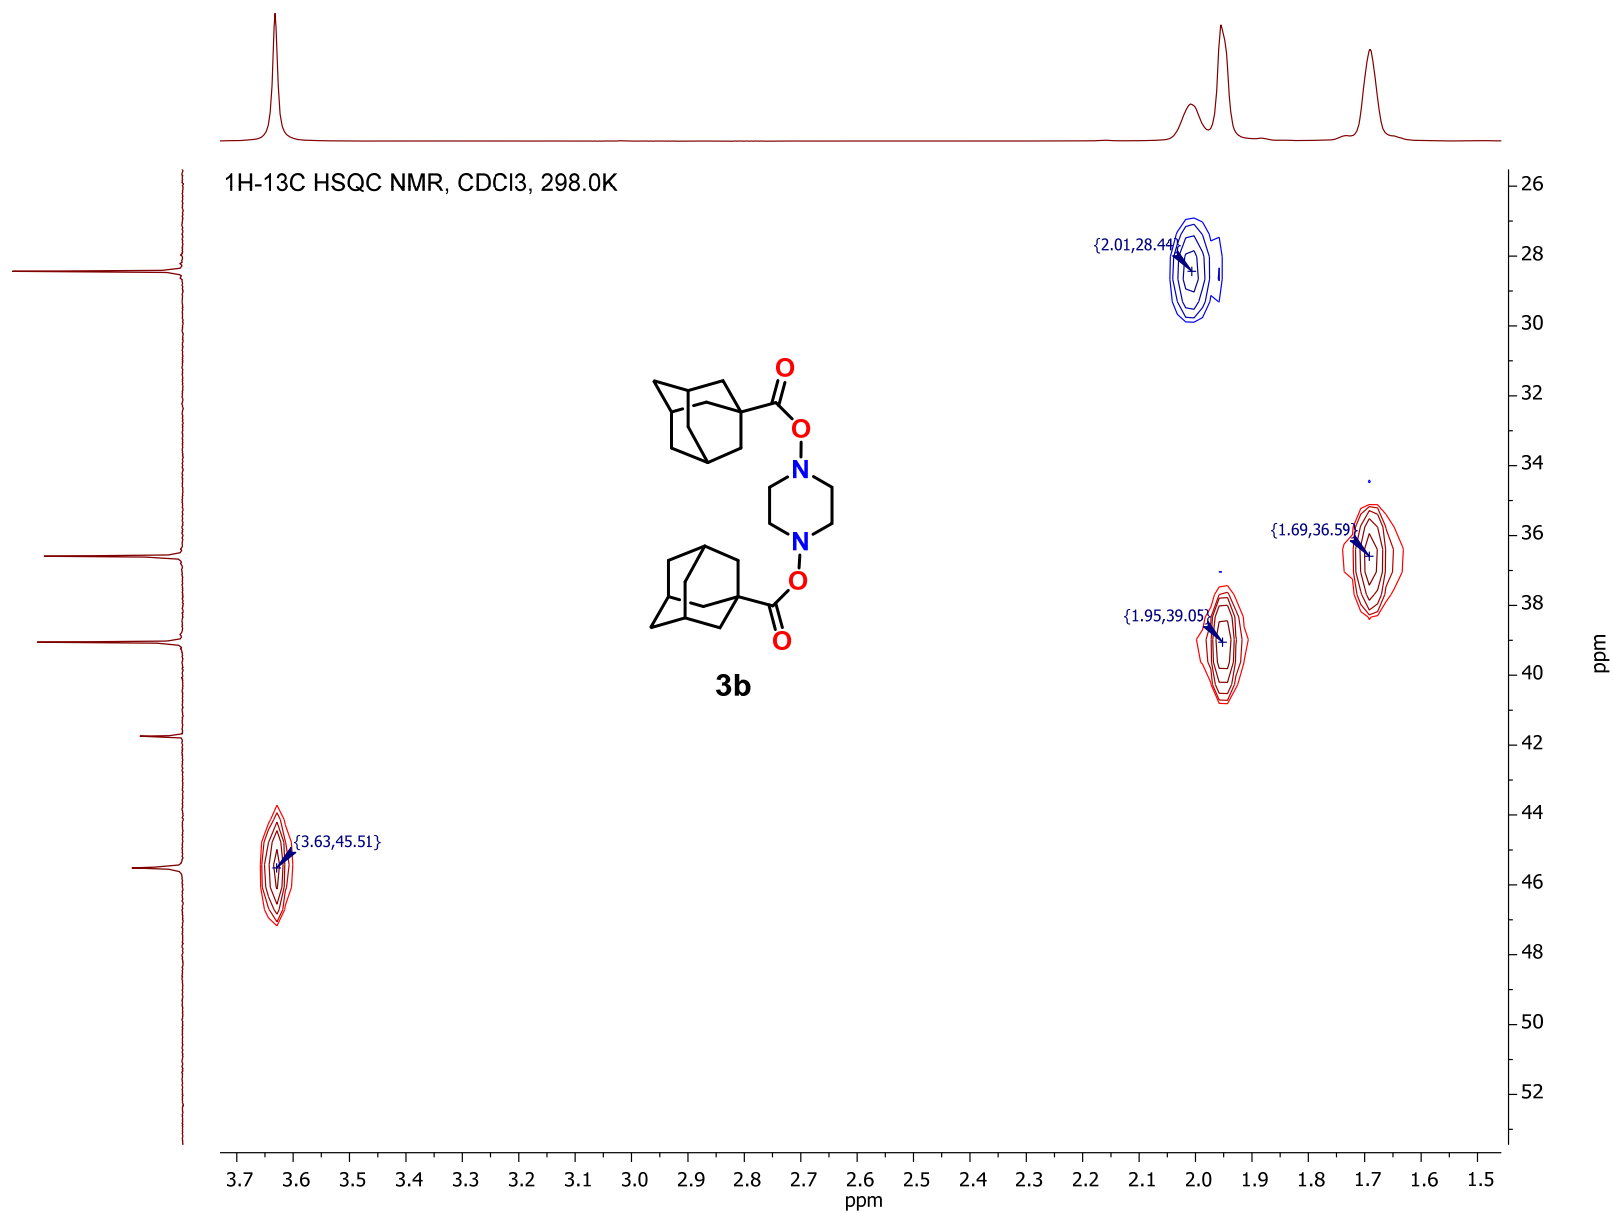

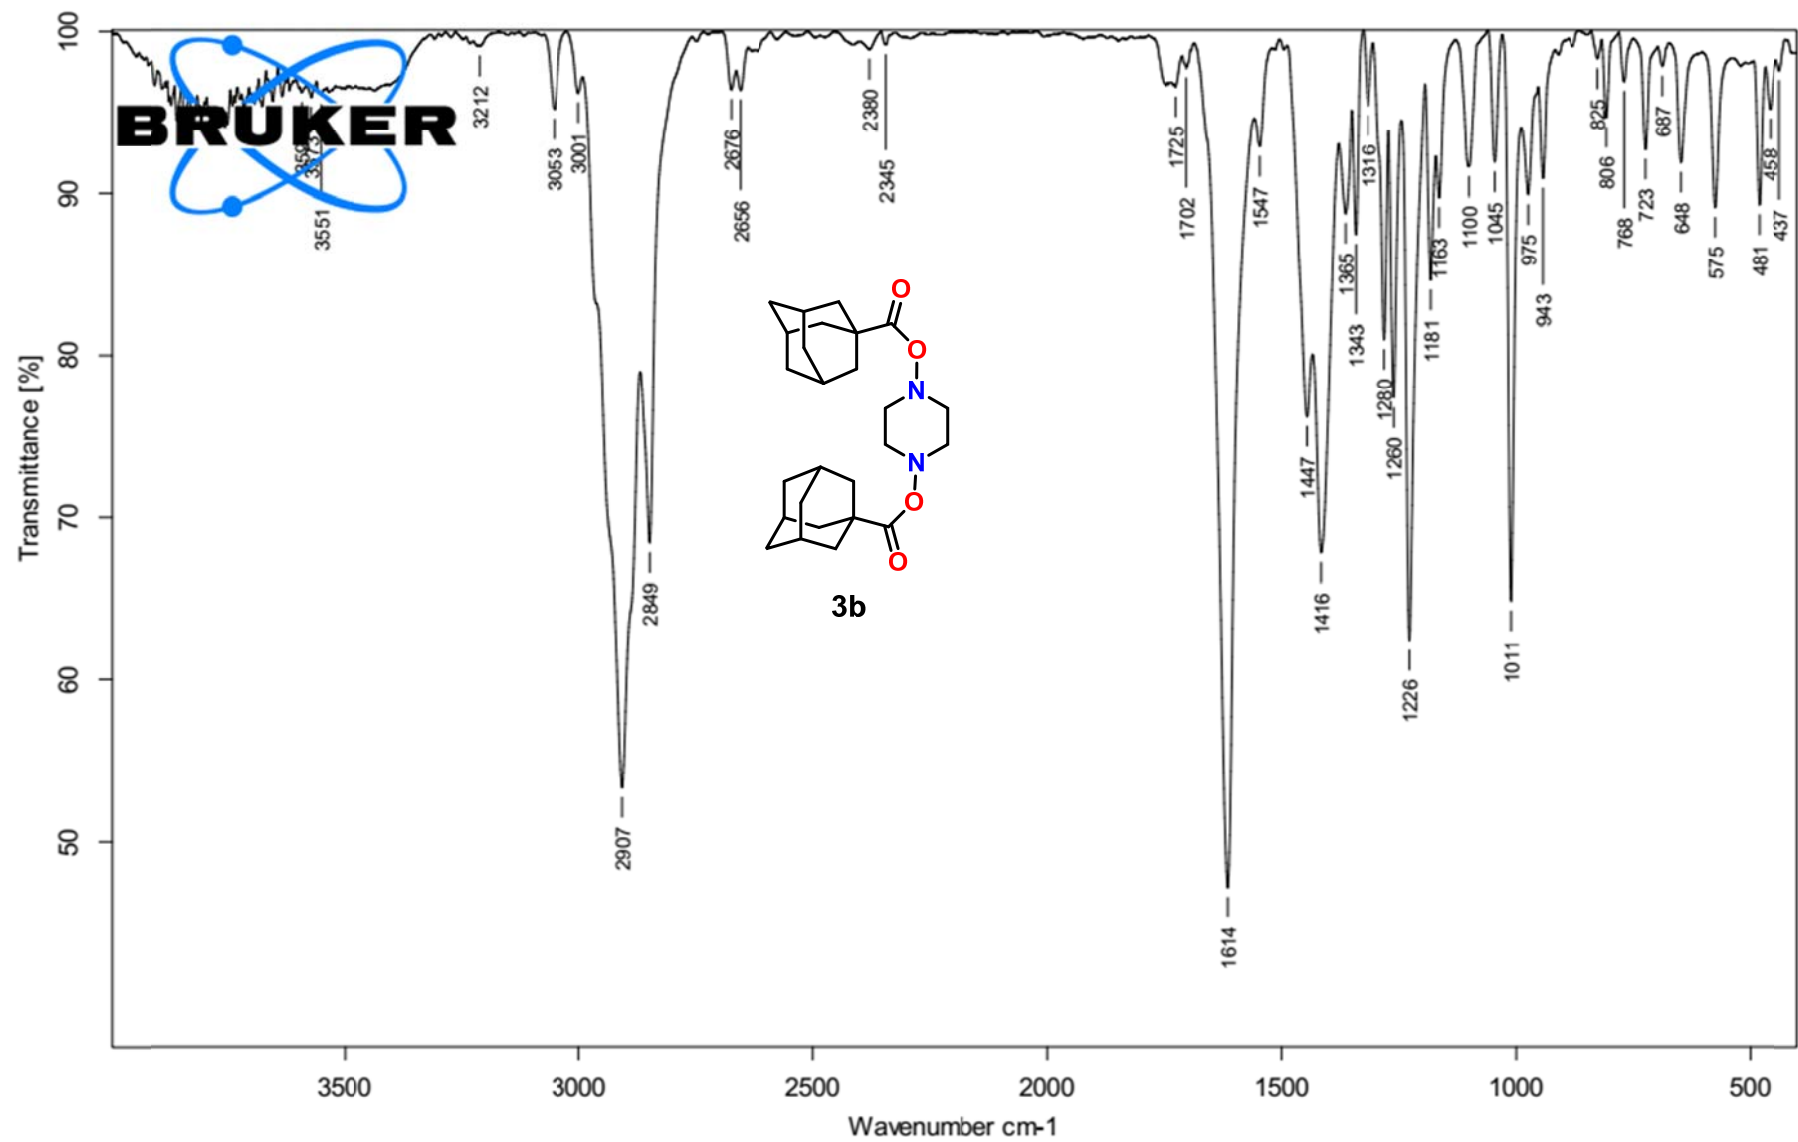

1H NMR 300.23MHz, CDCl3, 298.0K

— 7.26 CDCl3

— 3.67

2.04  
1.99  
1.91  
1.90  
1.72

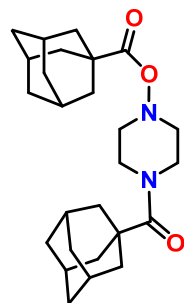

**4b**

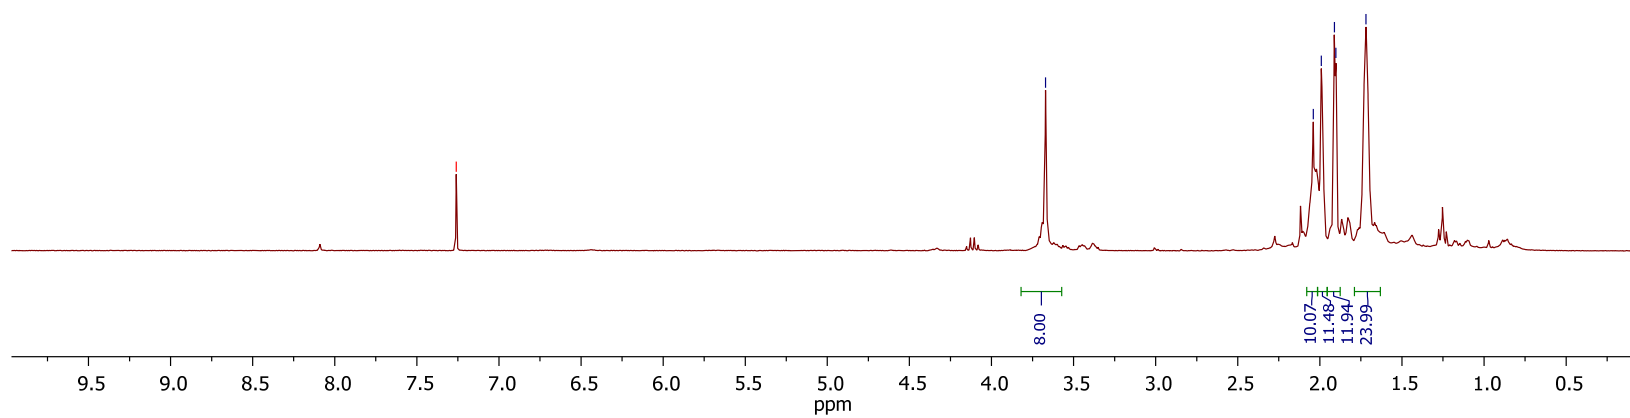

<sup>13</sup>C NMR 75.50MHz, CDCl<sub>3</sub>, 298.0K

176.30

77.16 CDCl<sub>3</sub>

45.66

41.88

40.58

39.16

38.73

36.70

36.55

28.55

27.96

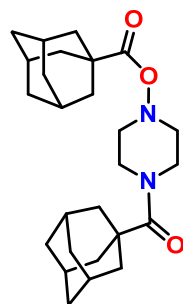

**4b**

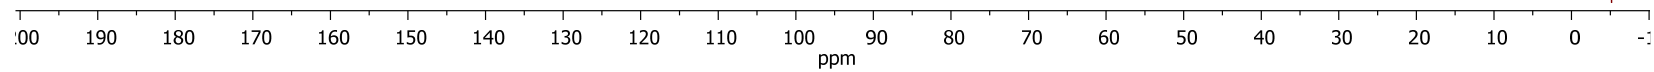

$^{13}\text{C}$  NMR 75.50MHz,  $\text{CDCl}_3$ , 298.0K

45.65  
39.16  
38.73  
36.70  
36.55  
28.55  
27.96

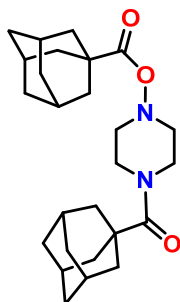

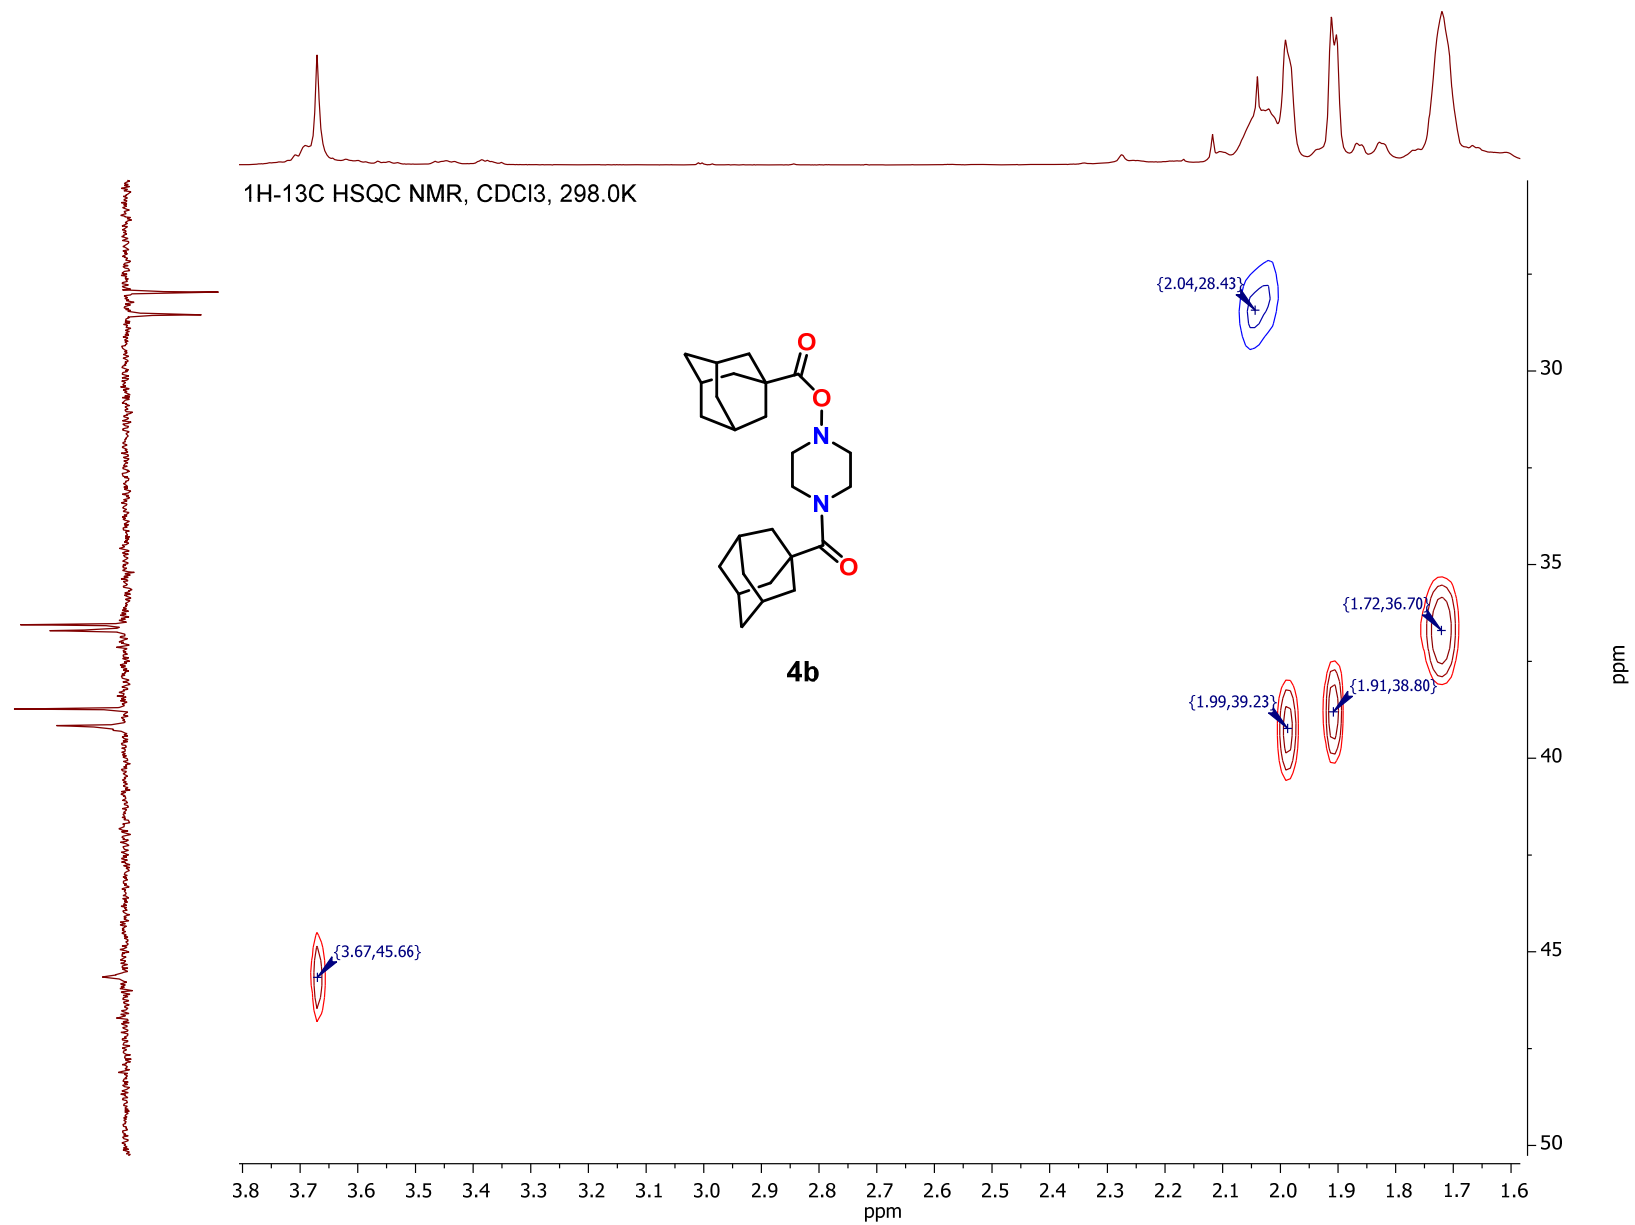

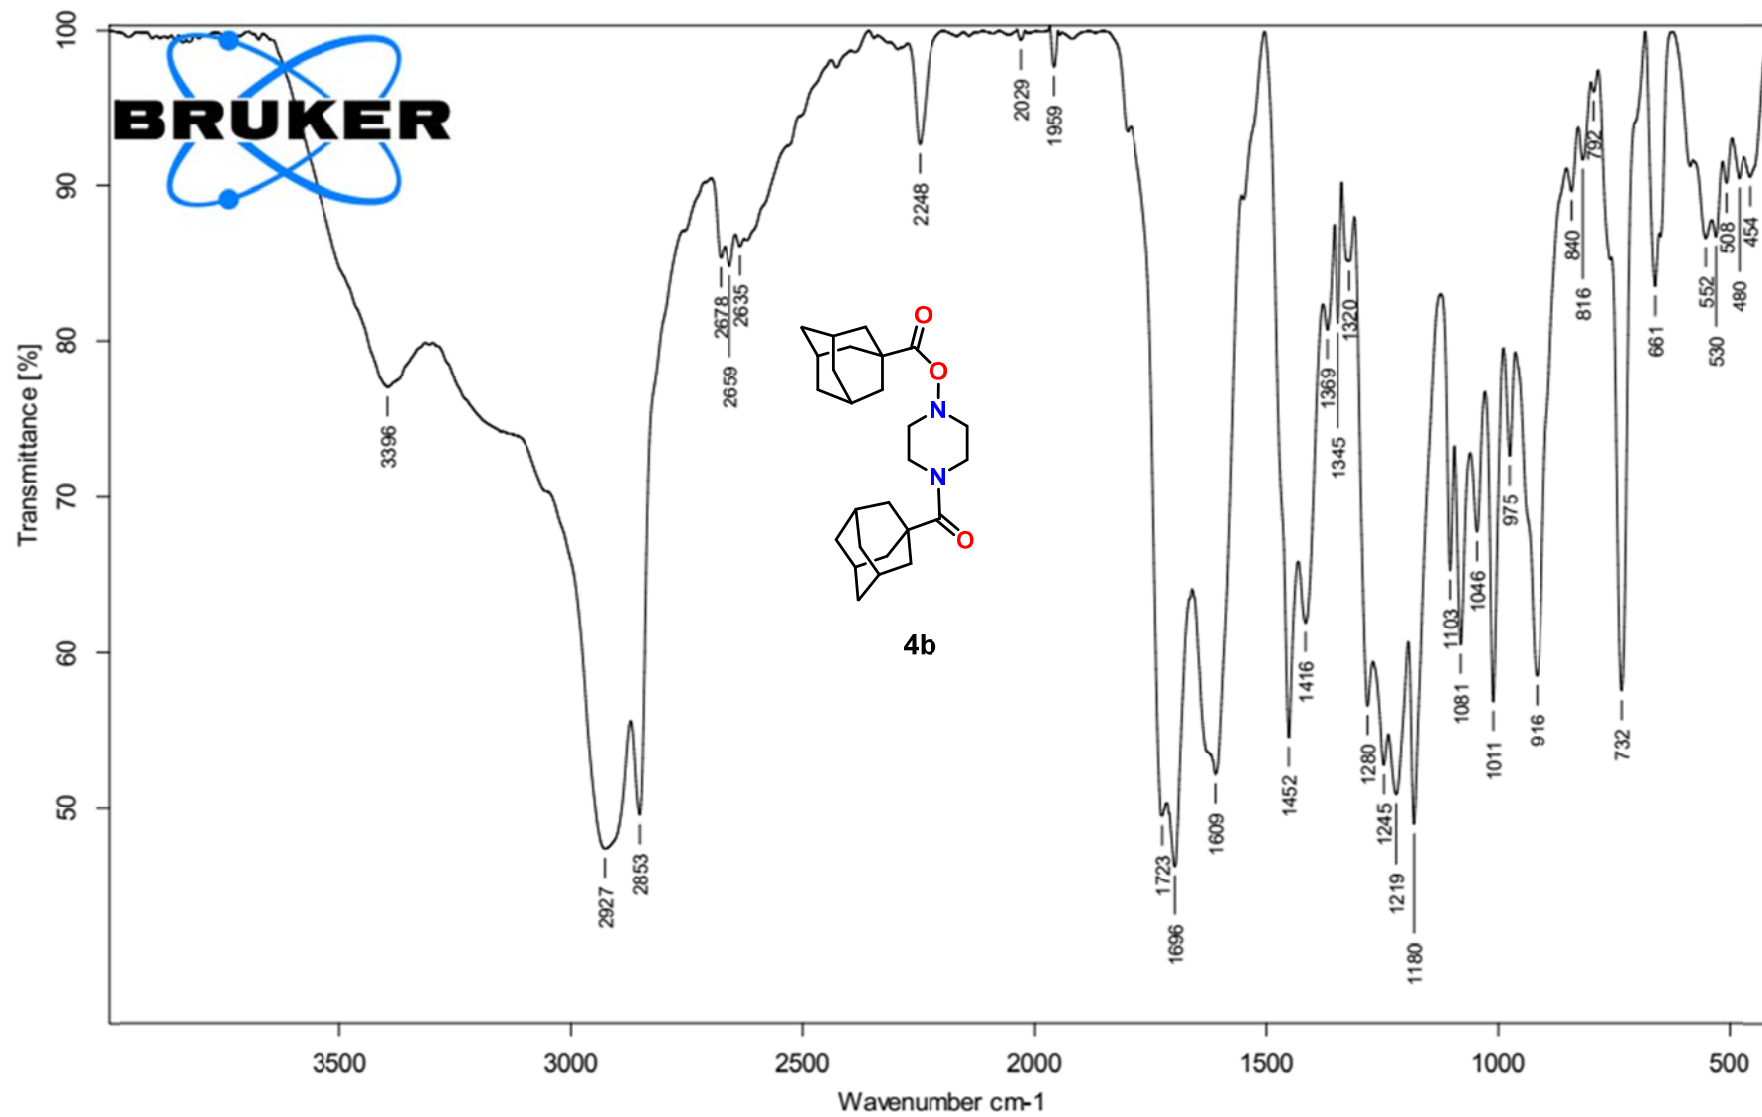

<sup>1</sup>H NMR 300.13MHz, DMSO-d<sub>6</sub>, 300.0K

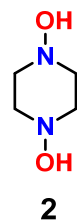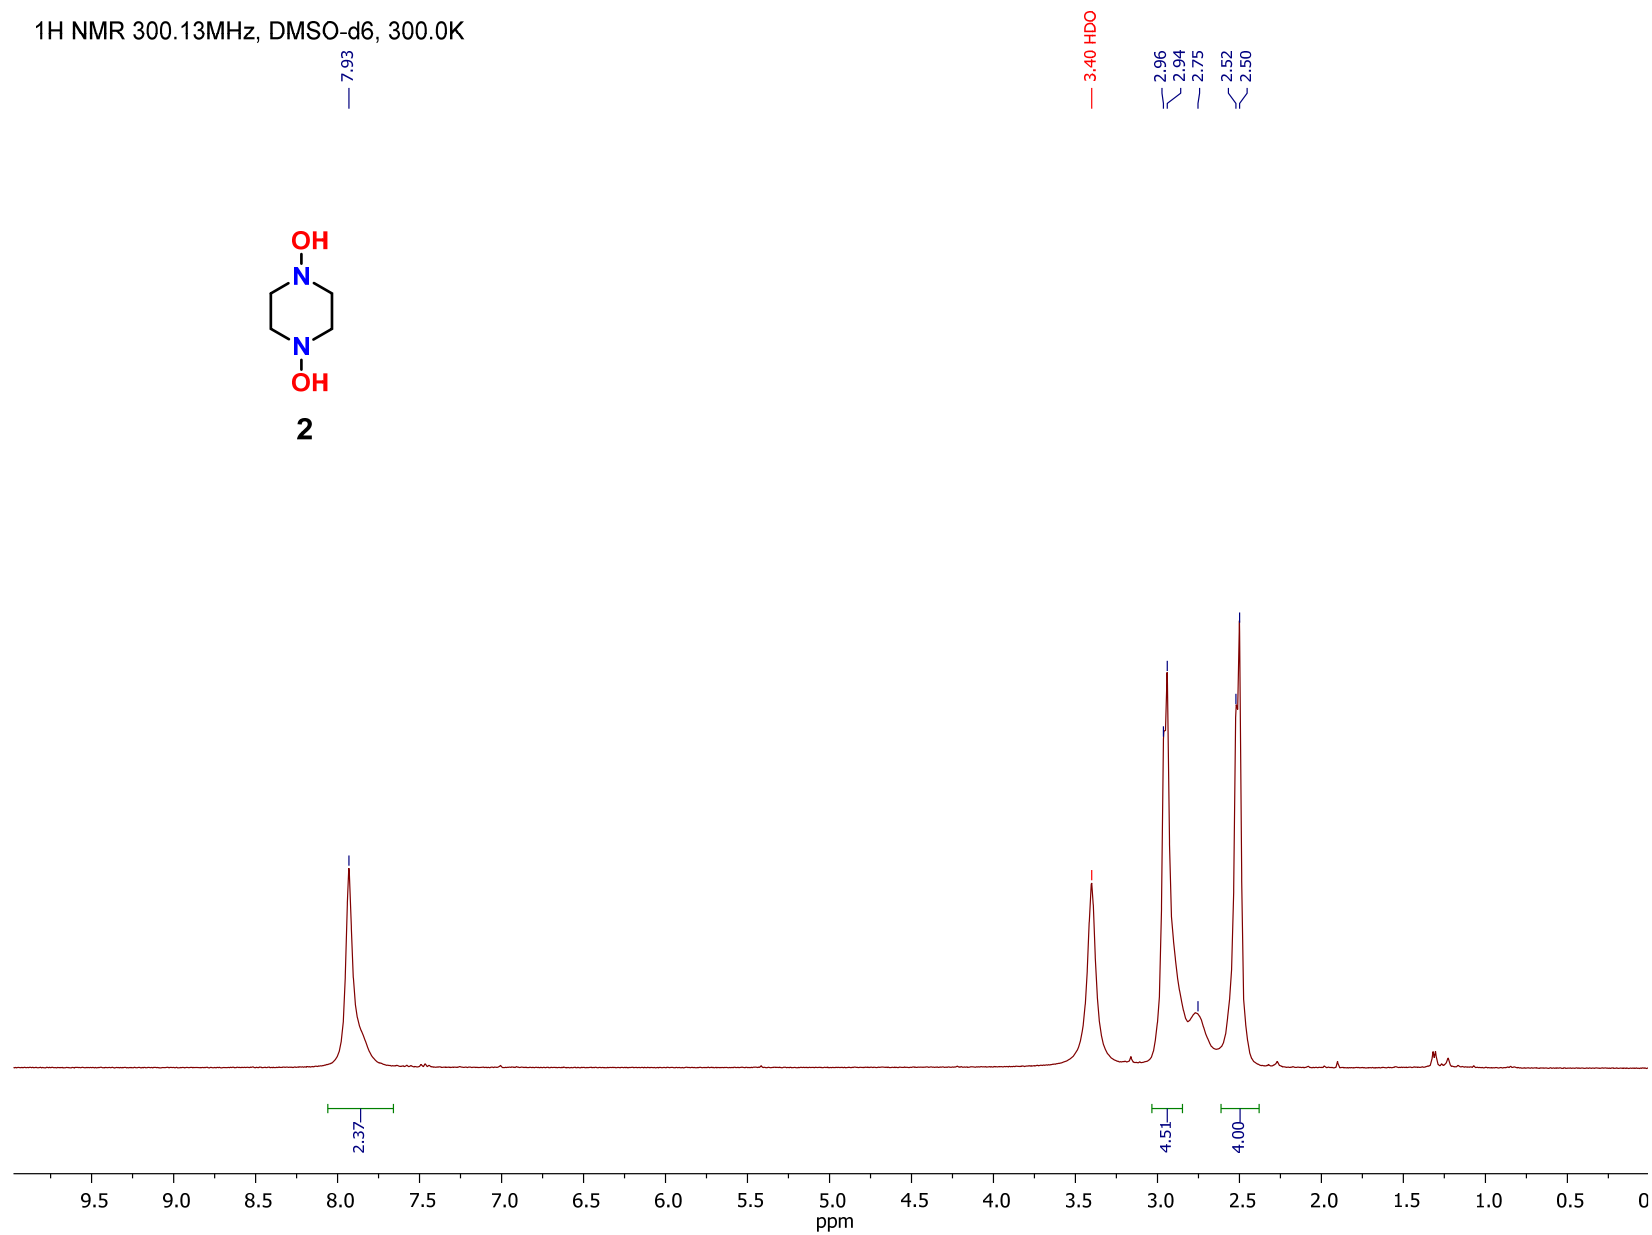

<sup>1</sup>H NMR 300.23MHz, DMSO-d<sub>6</sub>, 338.2K

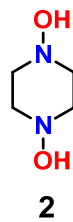

— 7.93

— 7.43

— 2.85

— 2.67

— 2.60

— 2.50 DMSO-d<sub>6</sub>

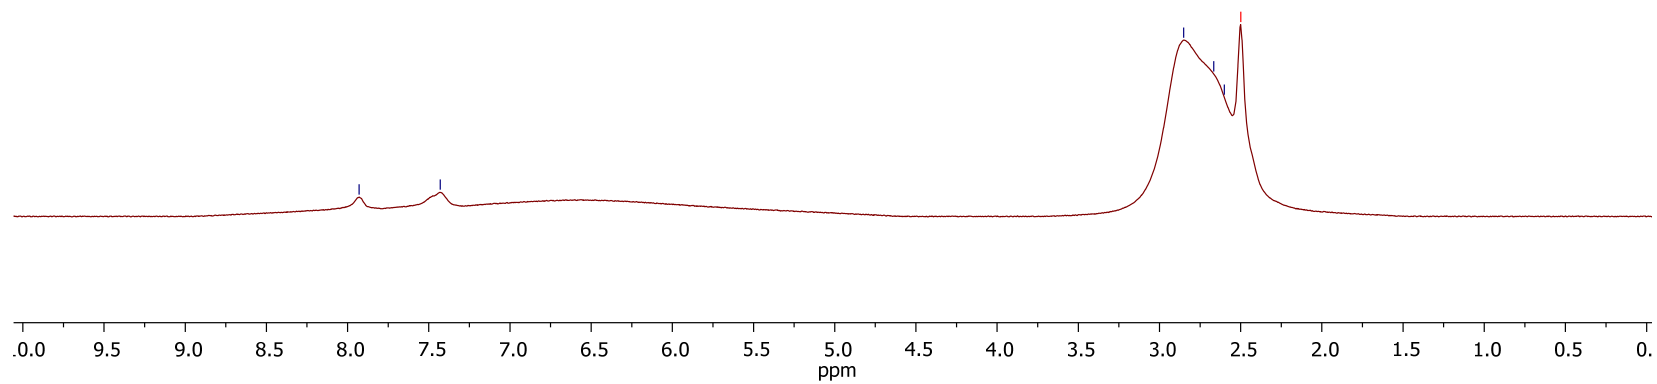

S35

<sup>13</sup>C NMR 75.48MHz, DMSO-d<sub>6</sub>, 300.1K

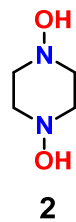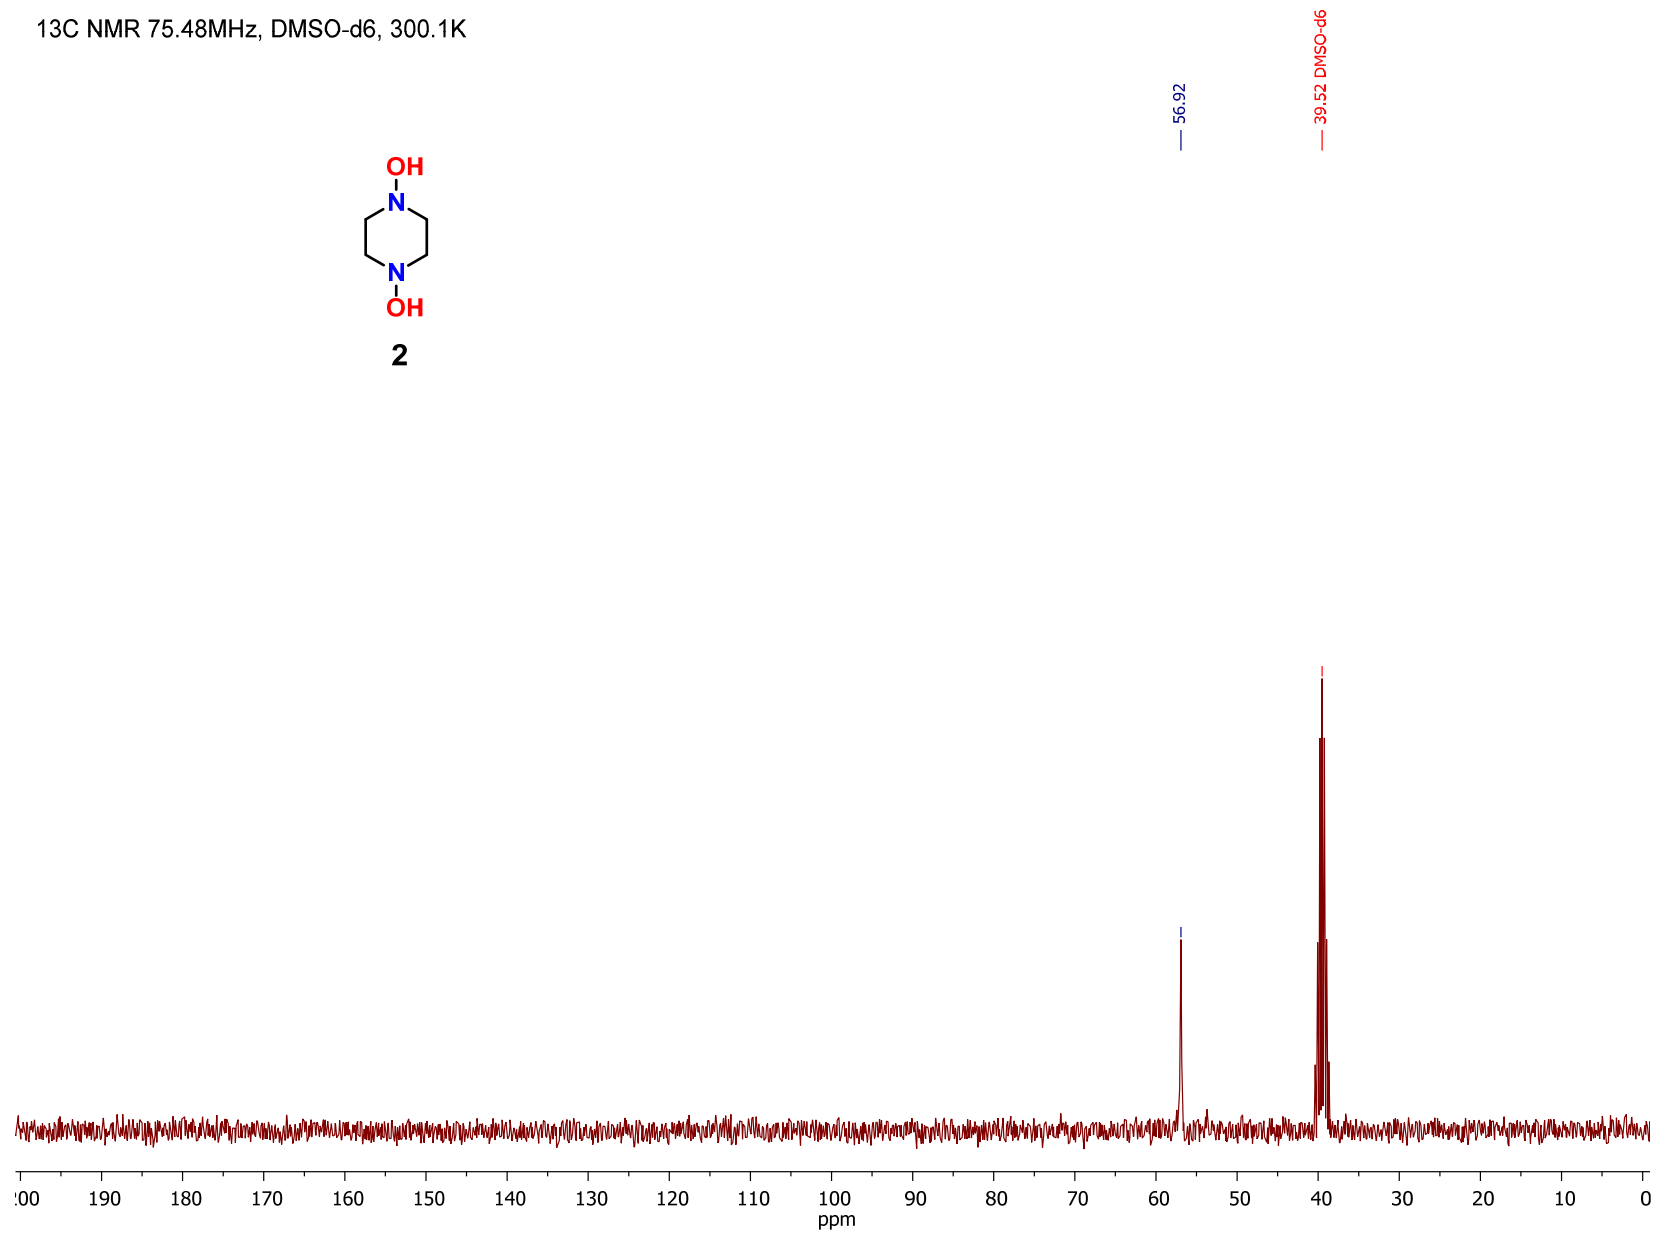

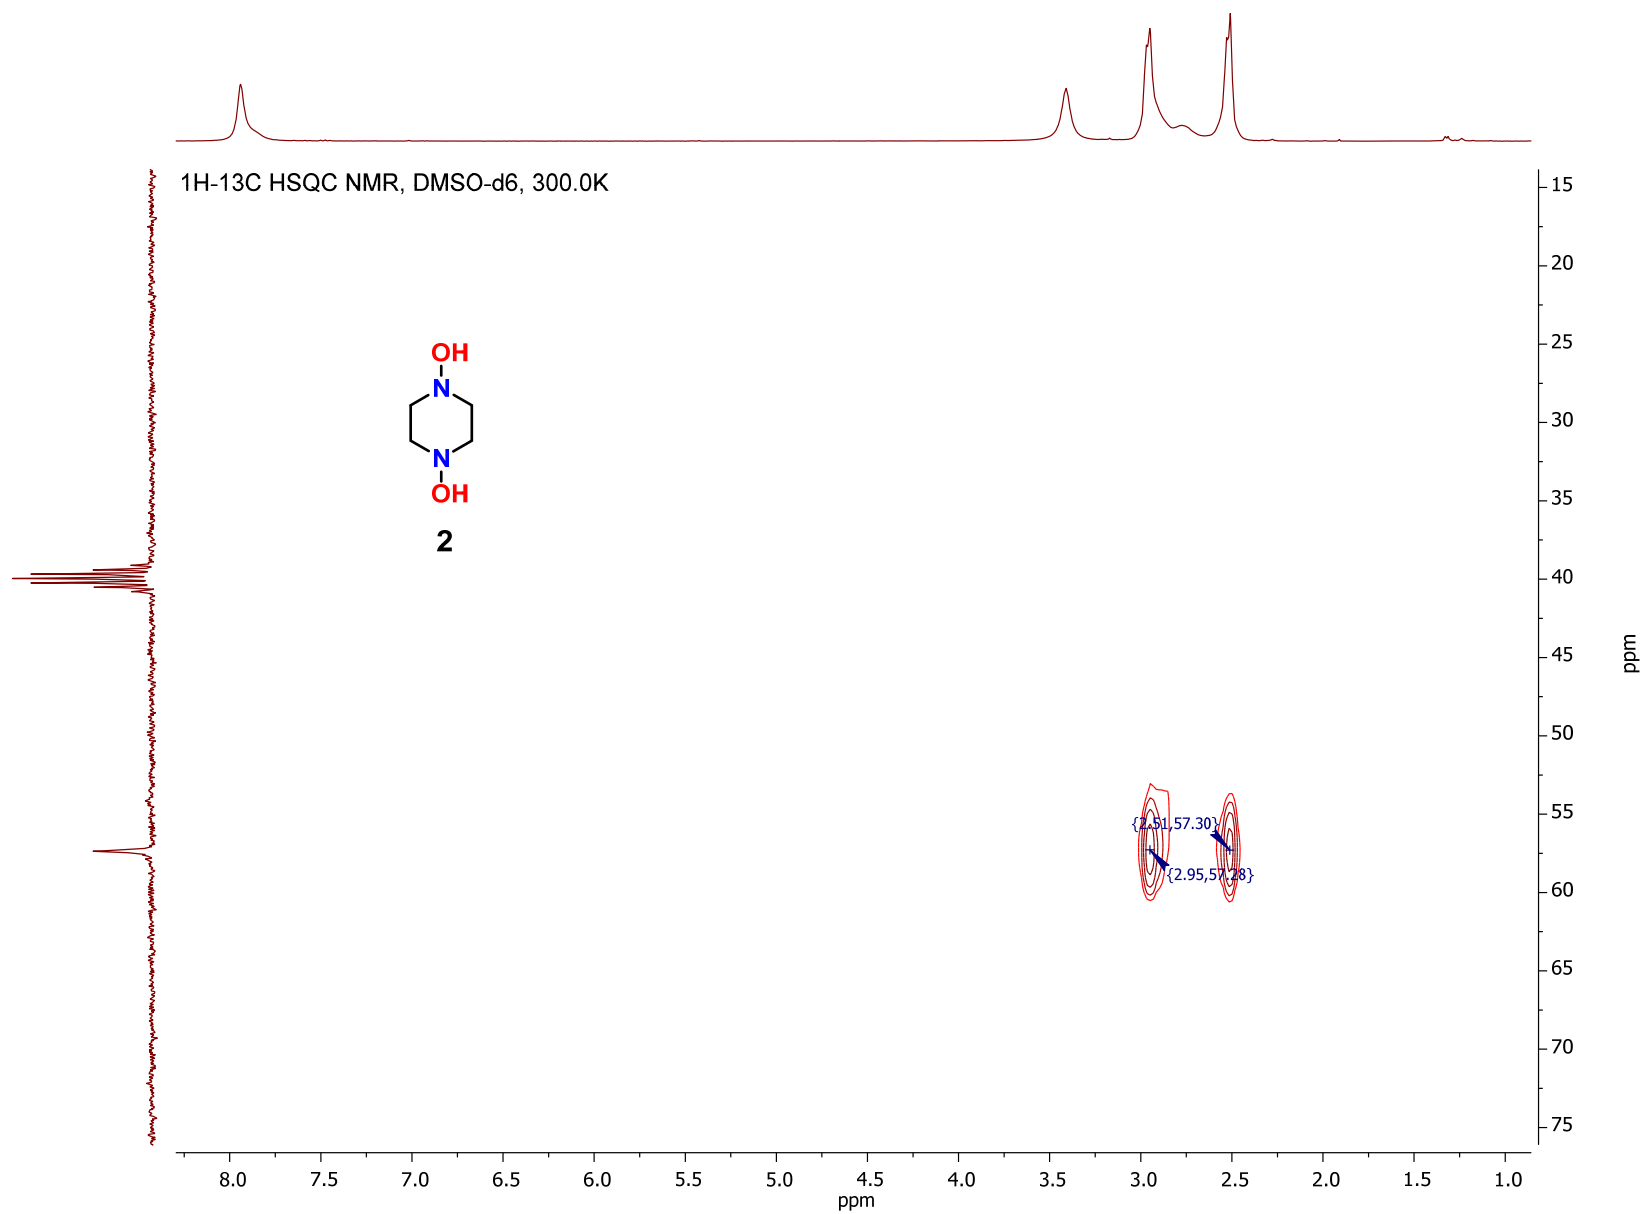

1H NMR 300.23MHz, D2O, 298.0K

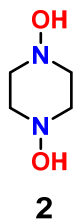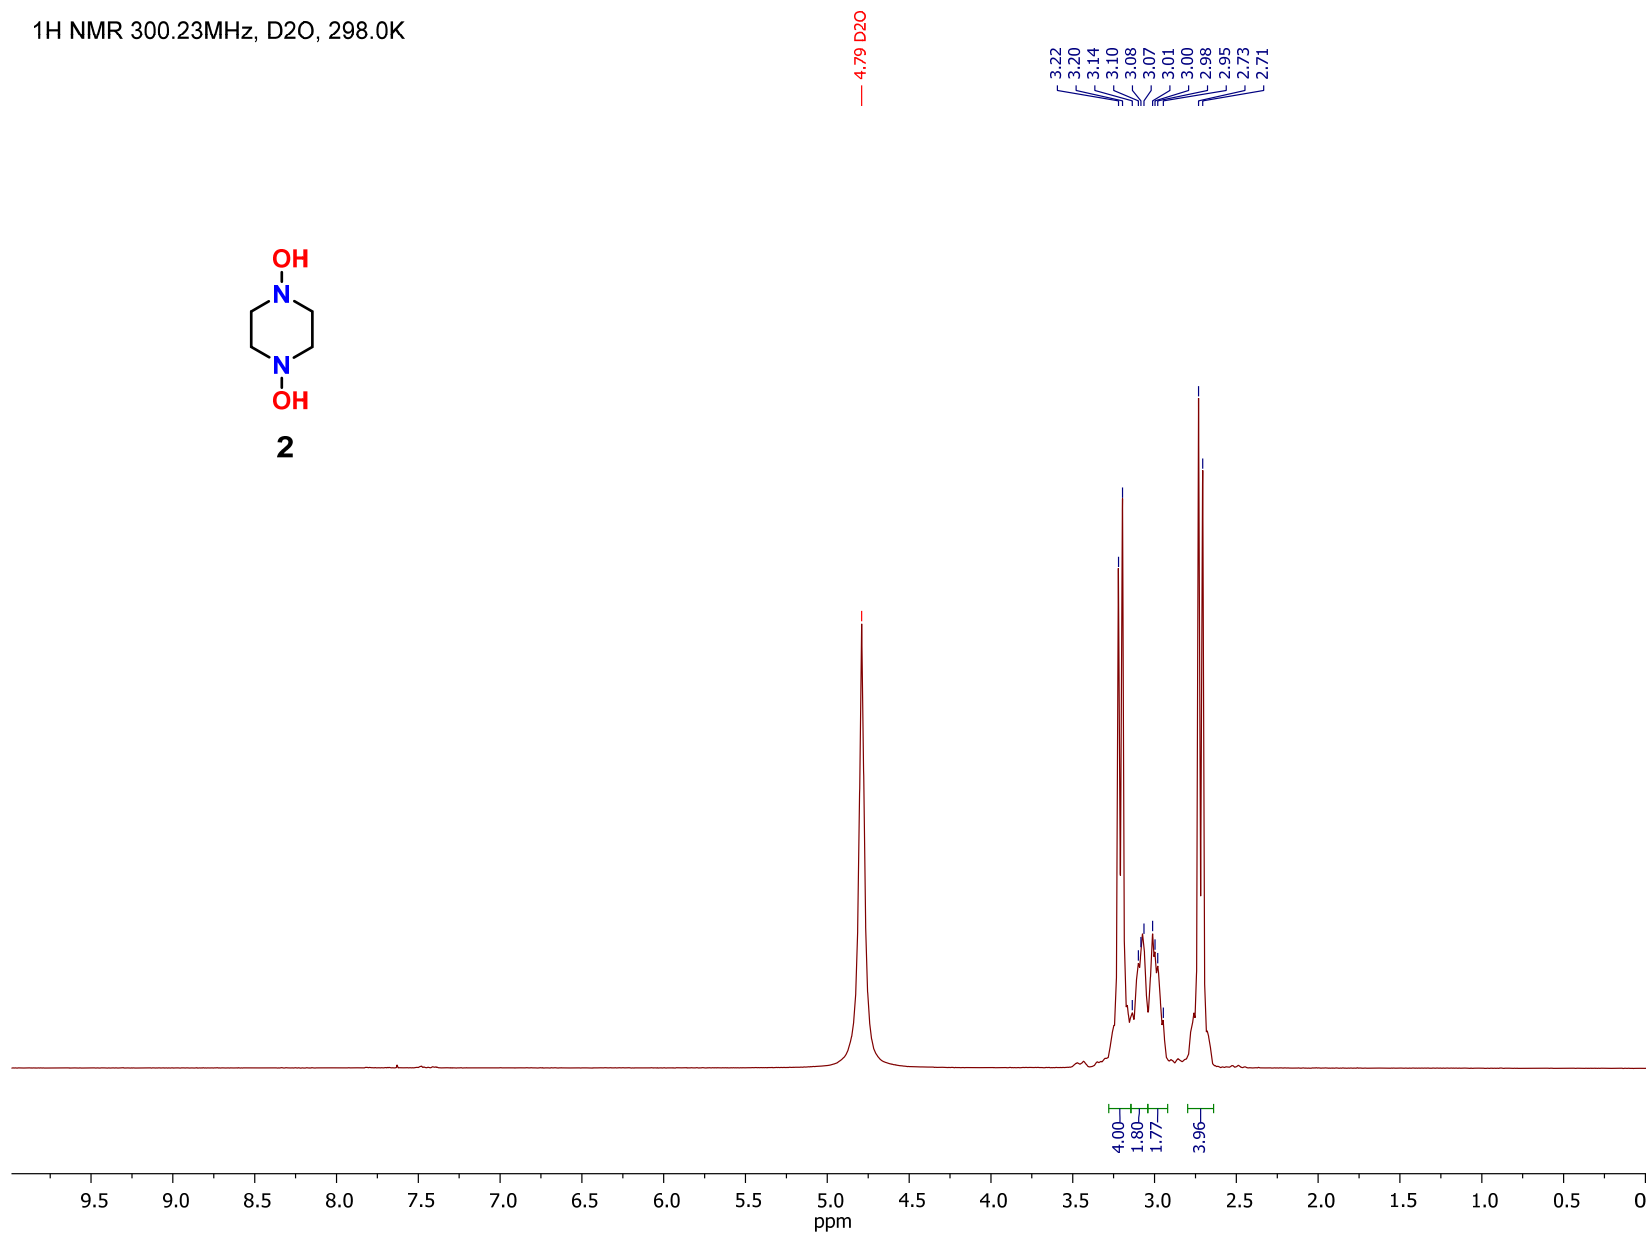

S38

<sup>13</sup>C NMR 75.48MHz, D<sub>2</sub>O, 300.1K

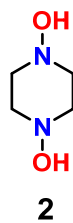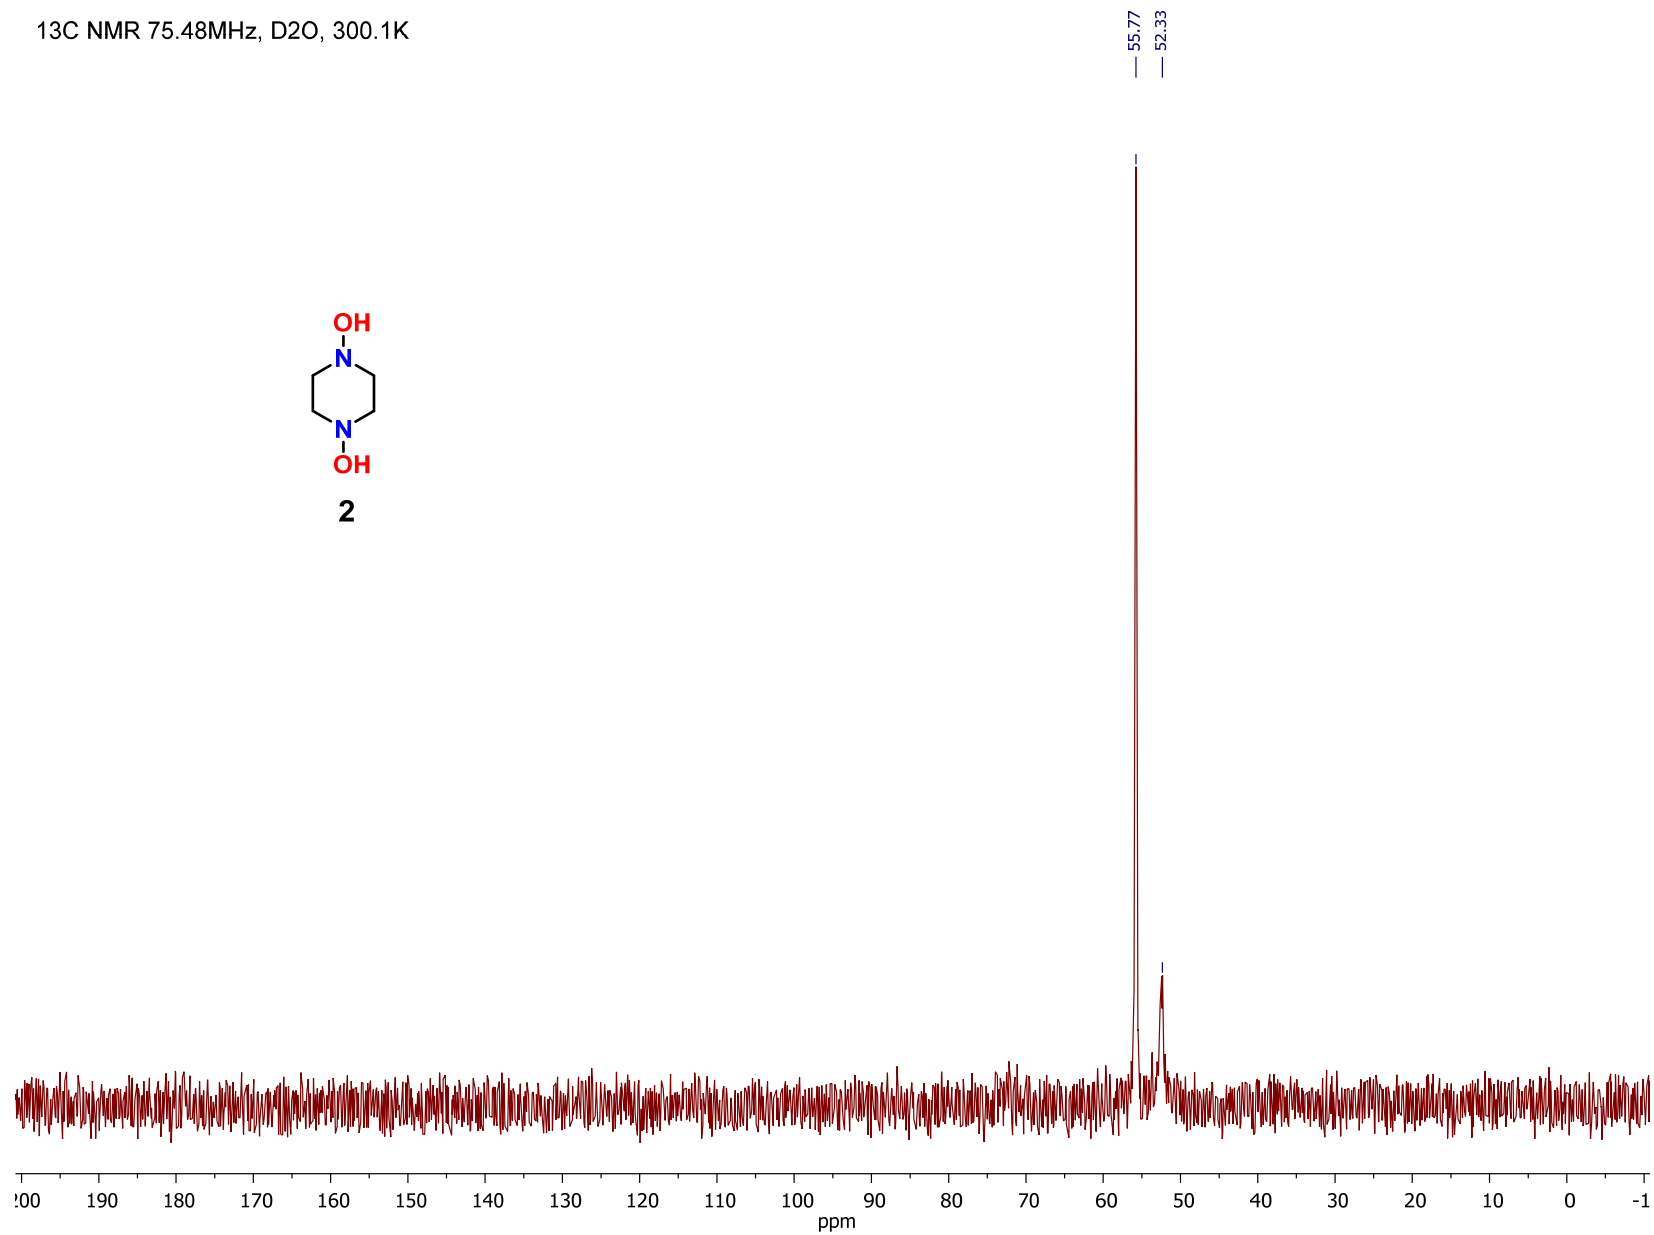

S39

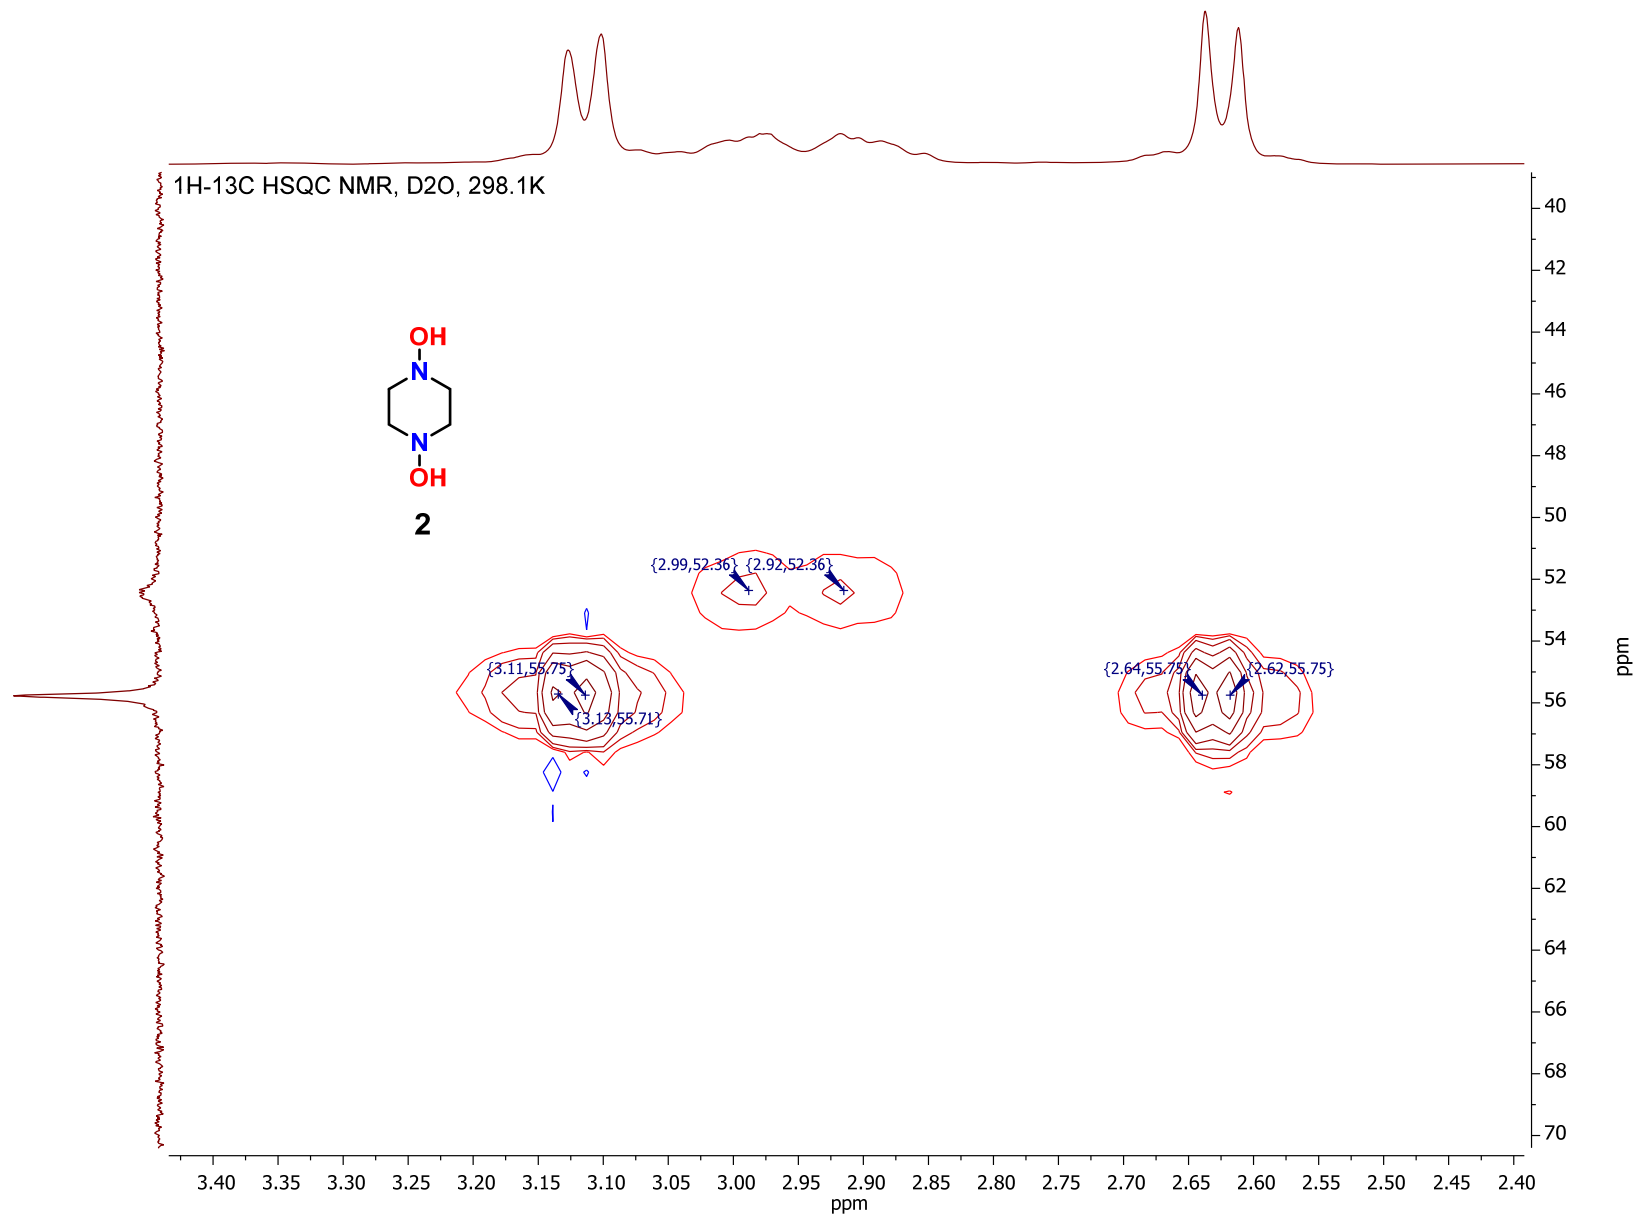

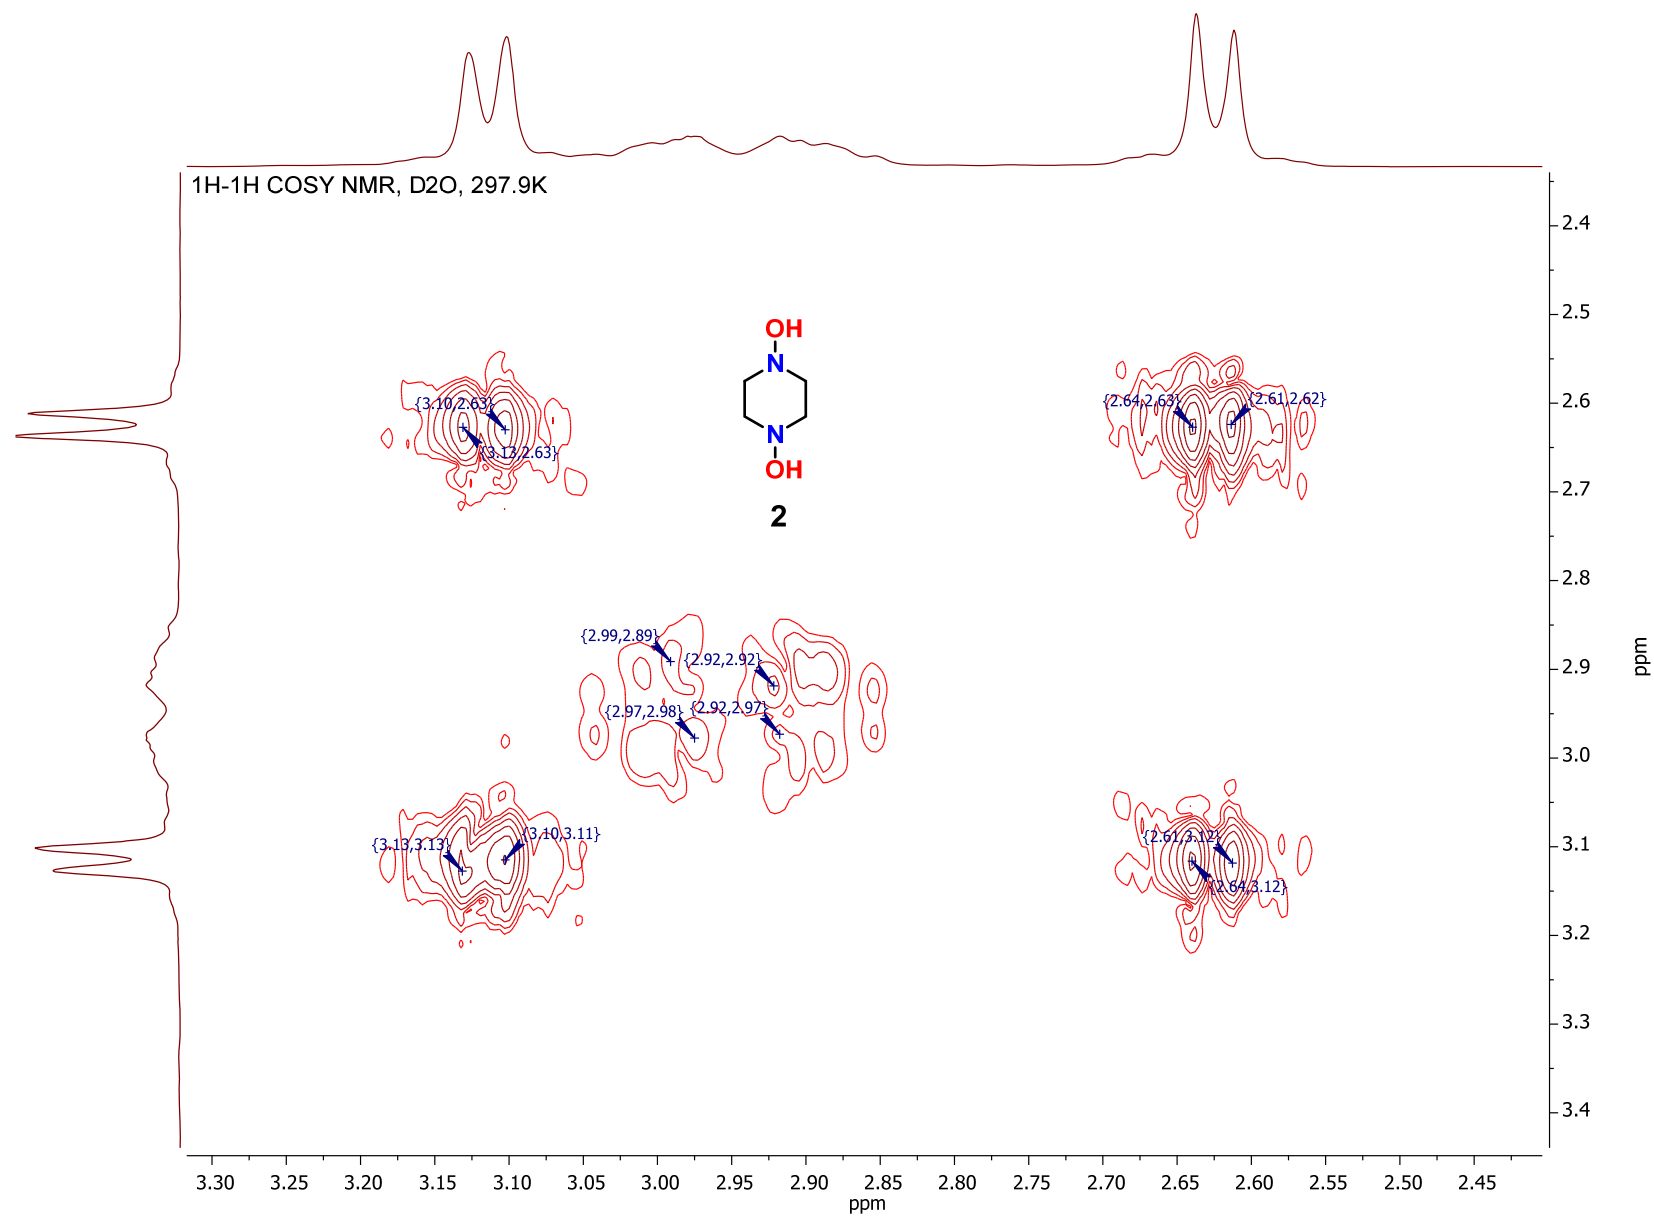

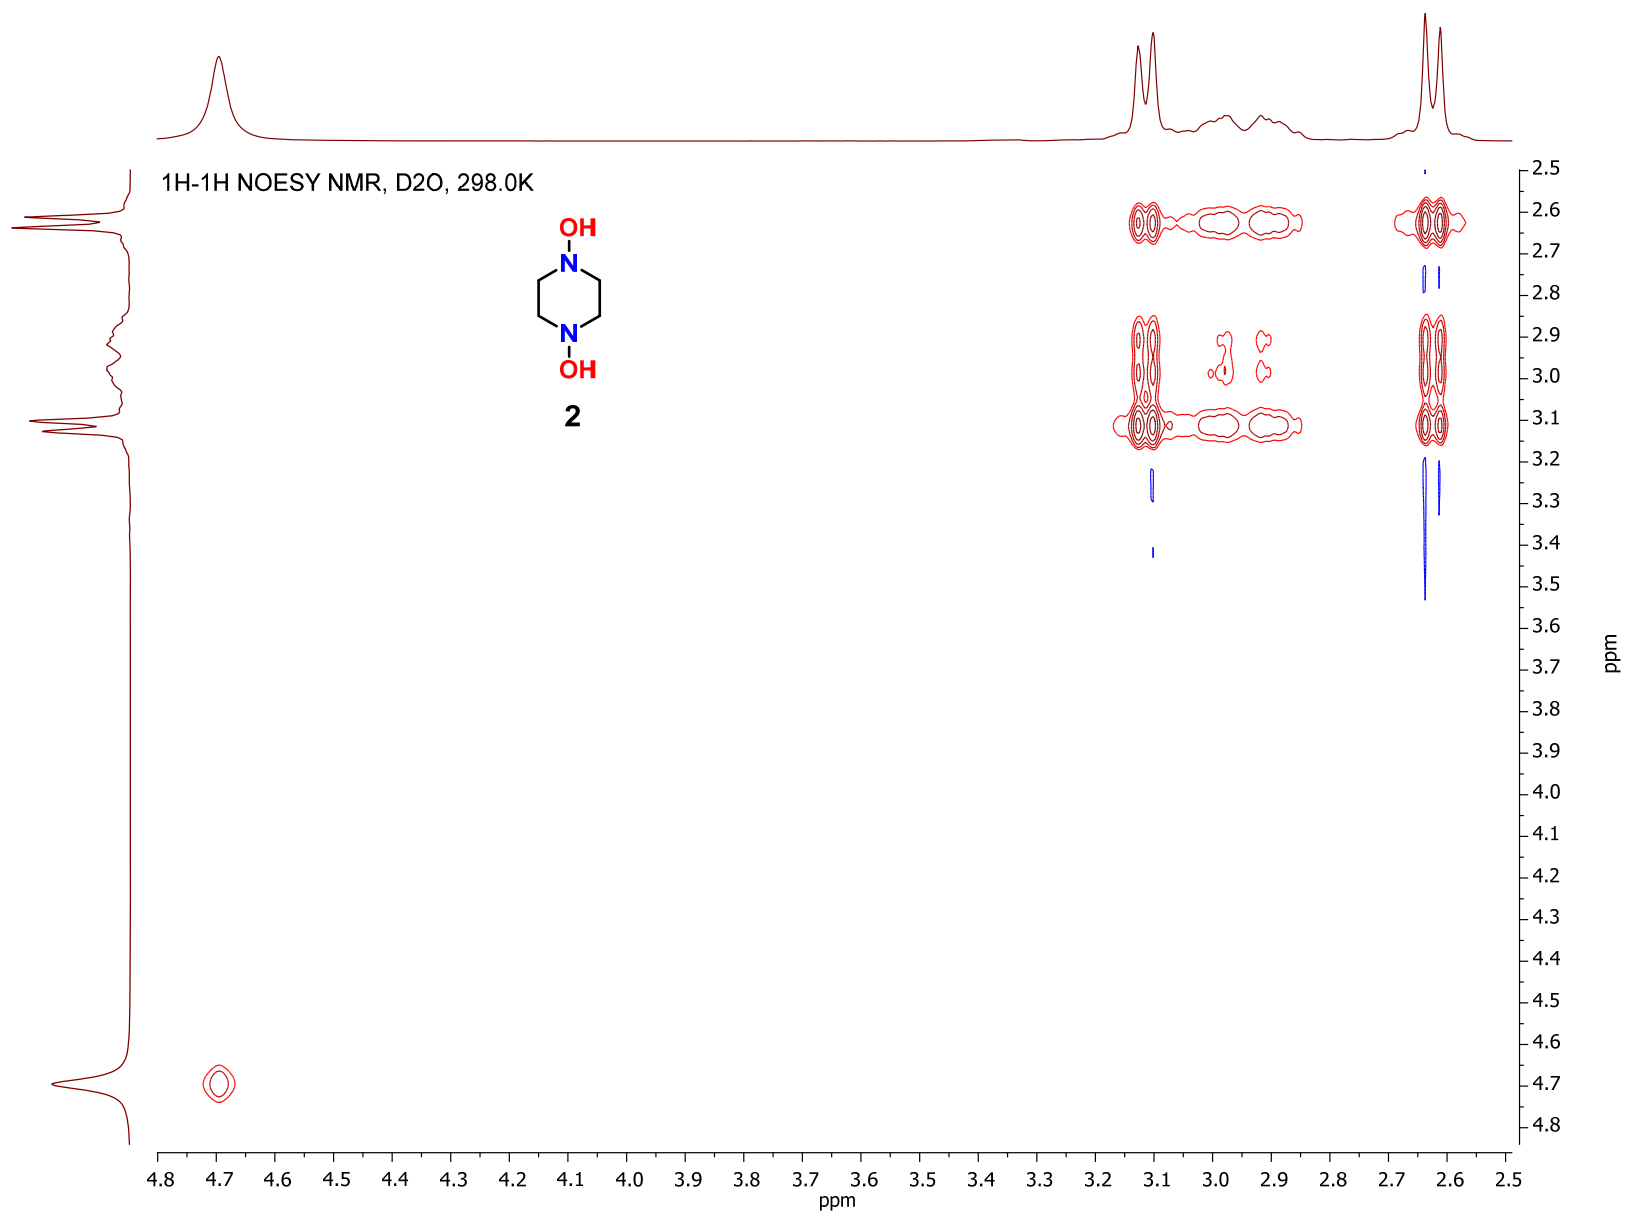

1H Selective NOE NMR 600.13MHz, D2O, 282.9K

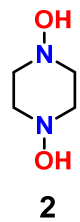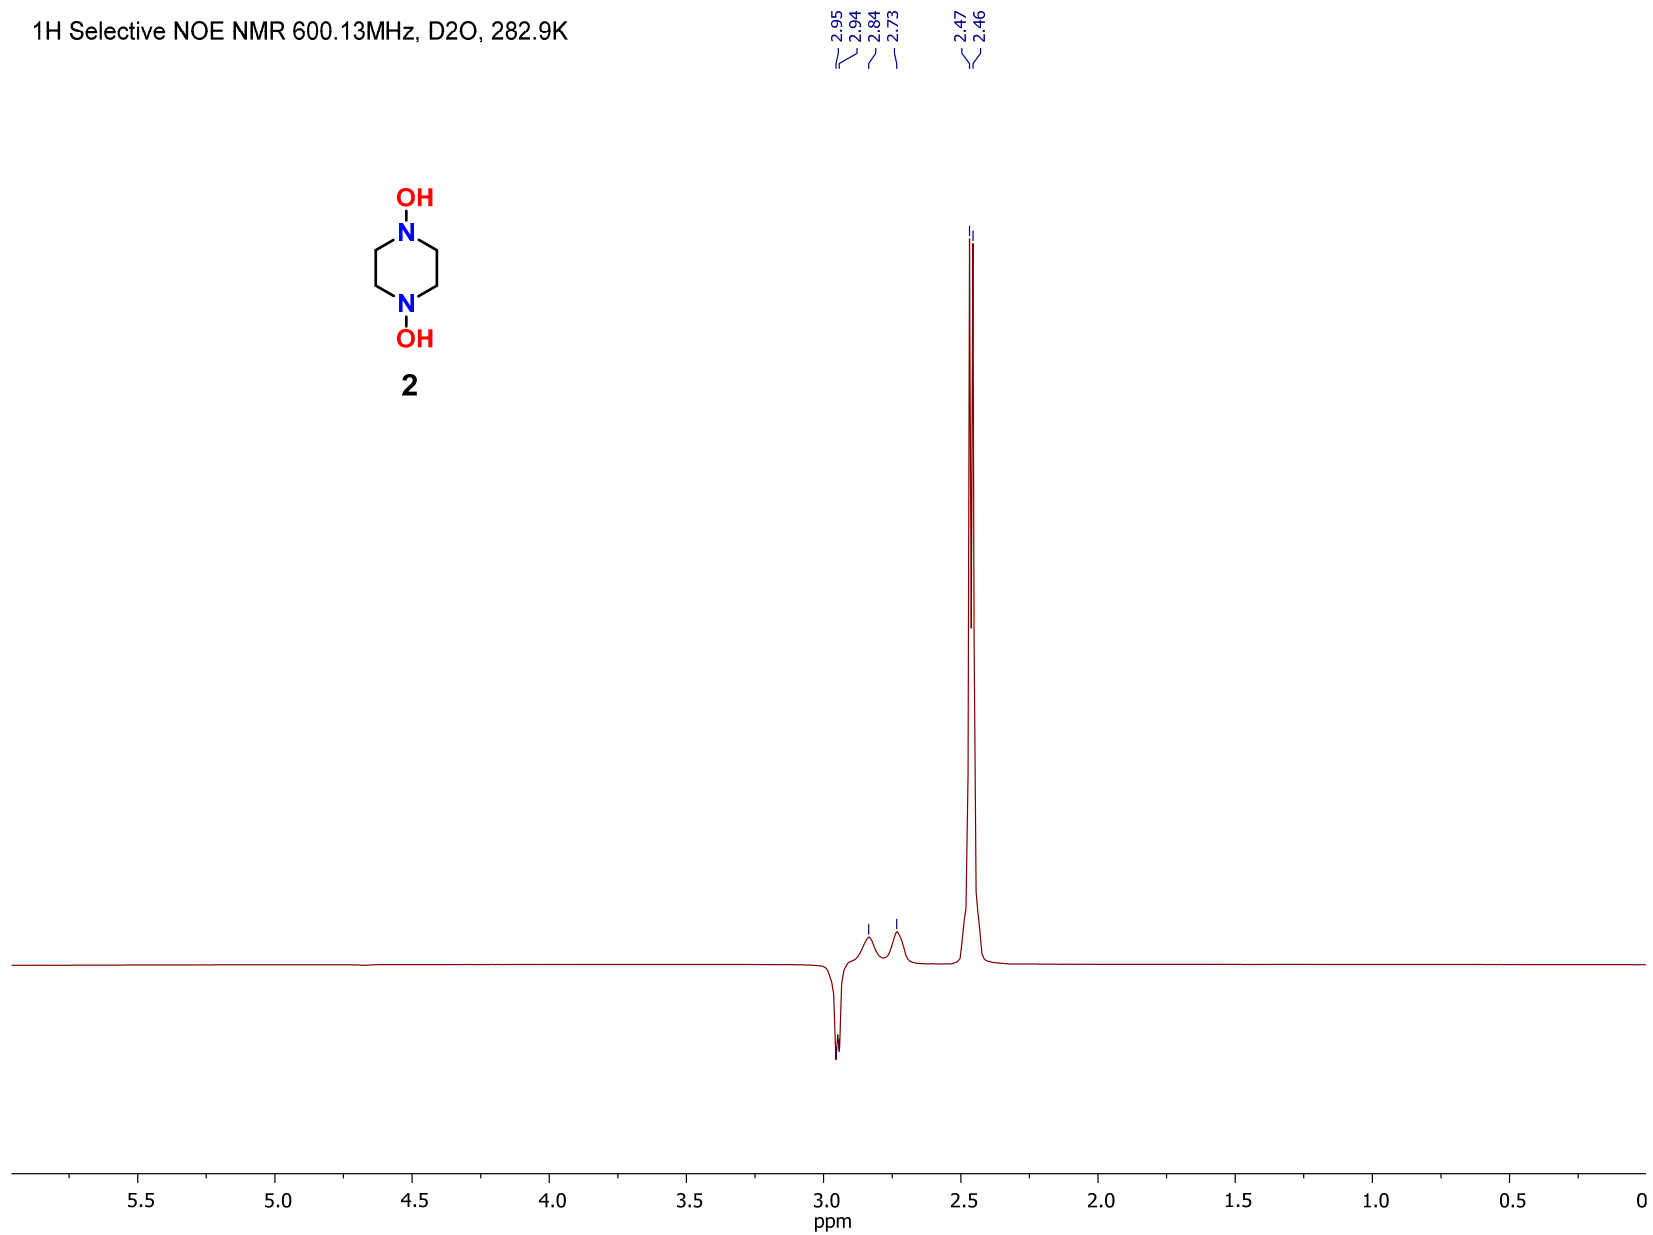

S43

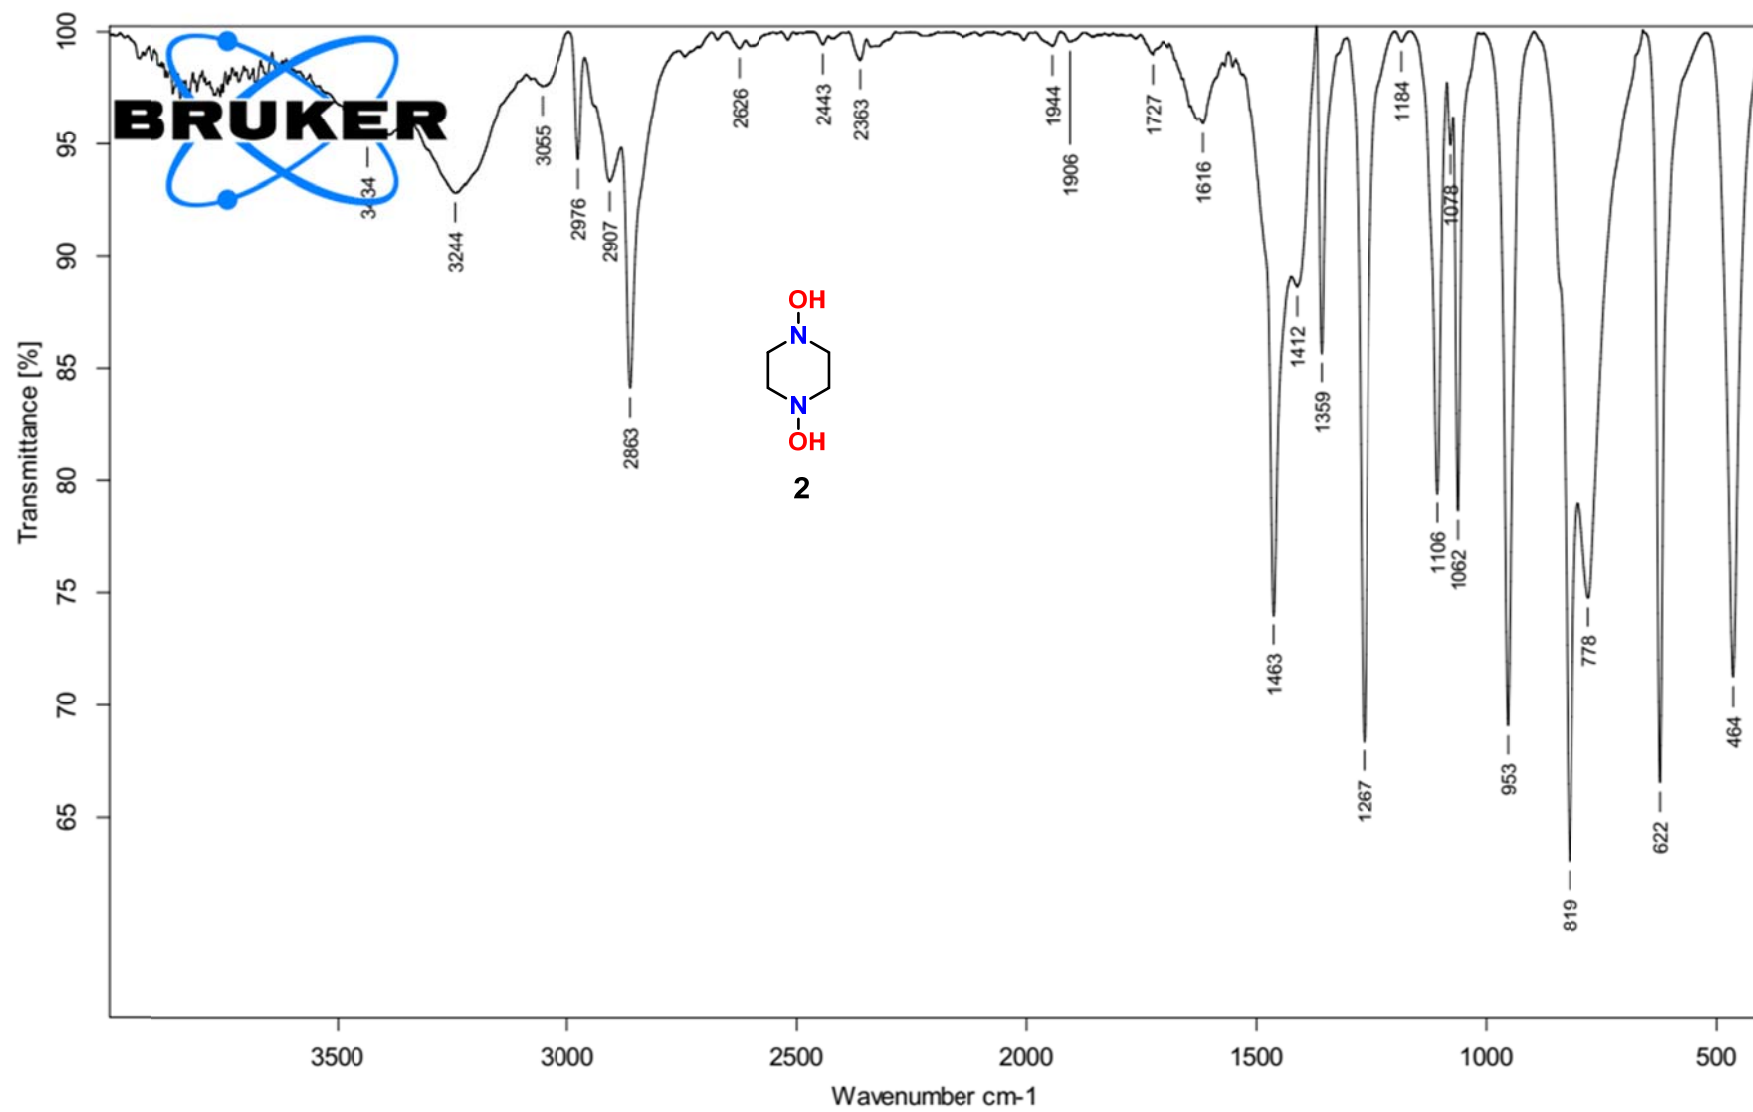

$^1\text{H}$  NMR 300.13MHz, D<sub>2</sub>O, 300.0K

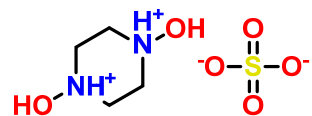

[H<sub>2</sub>(2)]<sup>2+</sup>[SO<sub>4</sub>]<sup>2-</sup>

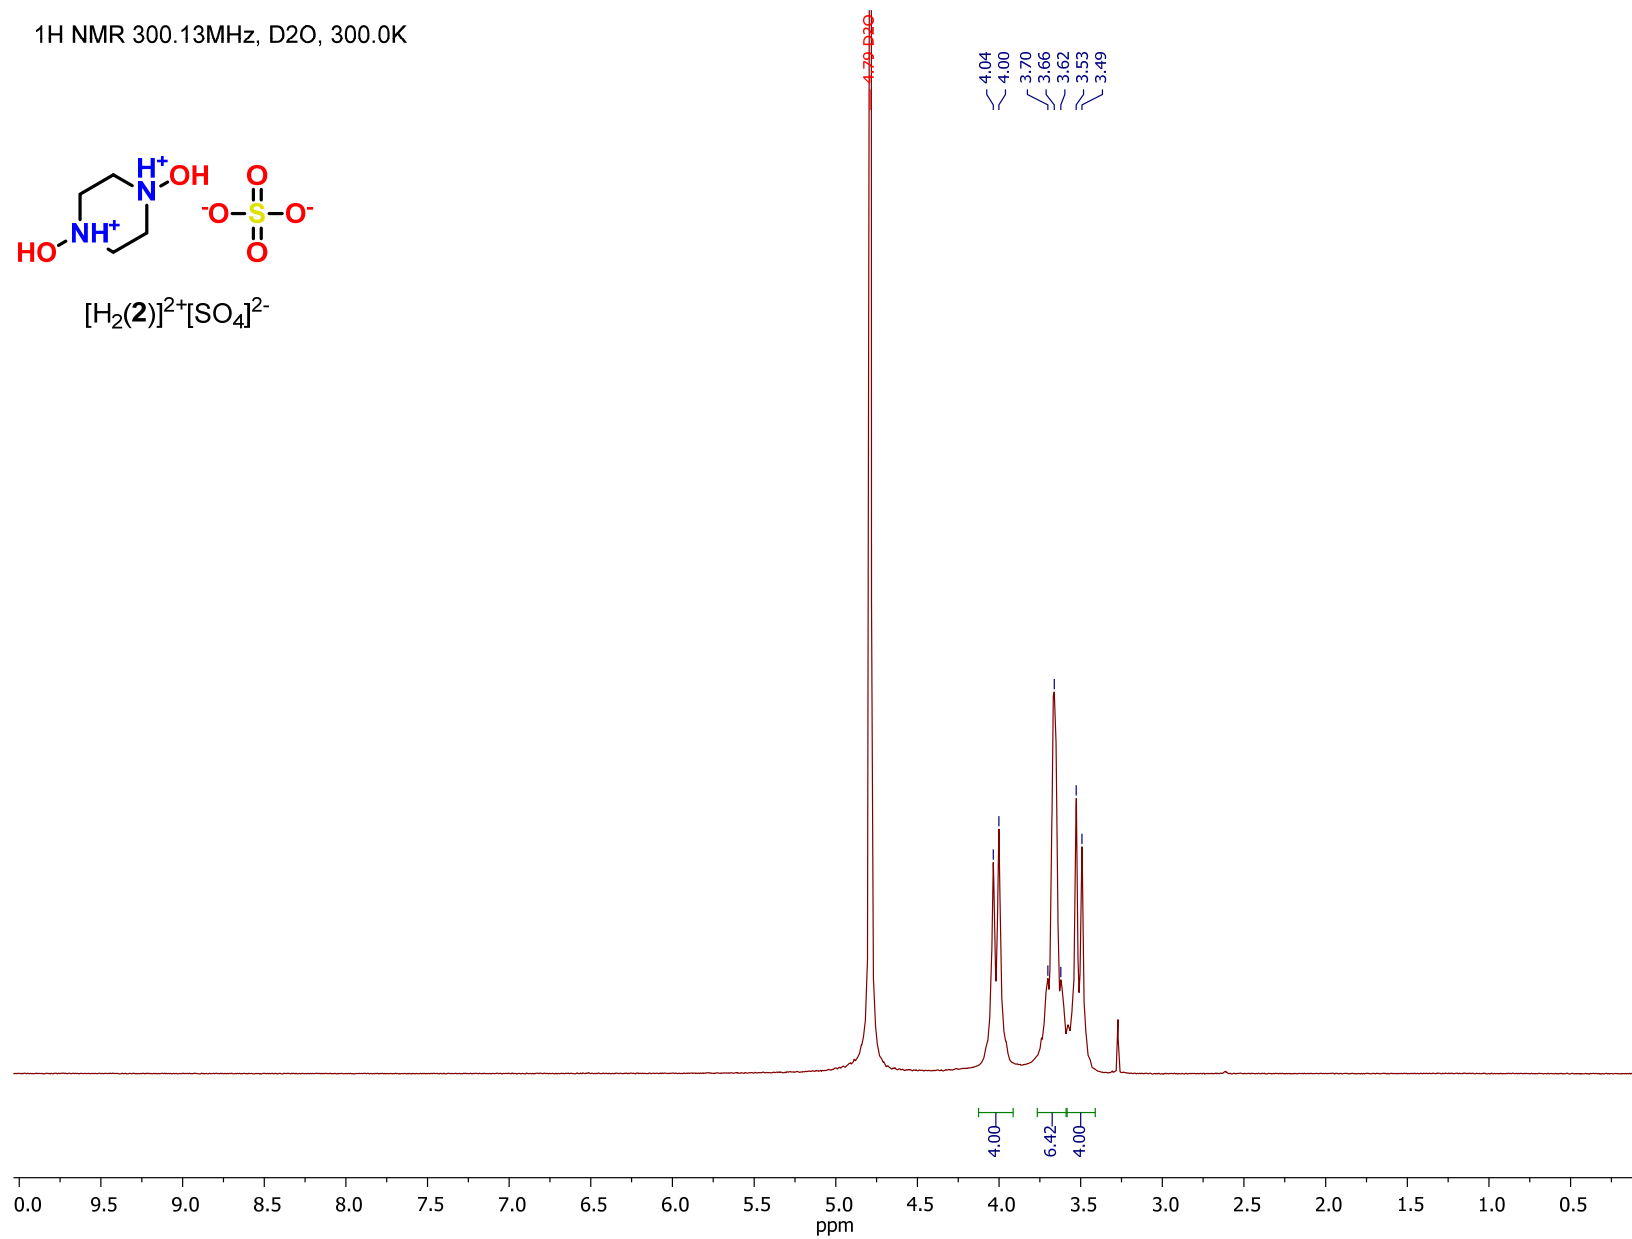

S45

$^{13}\text{C}$  NMR 75.50MHz, D<sub>2</sub>O, 298.0K

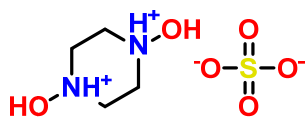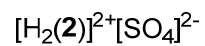

50.73  
48.94

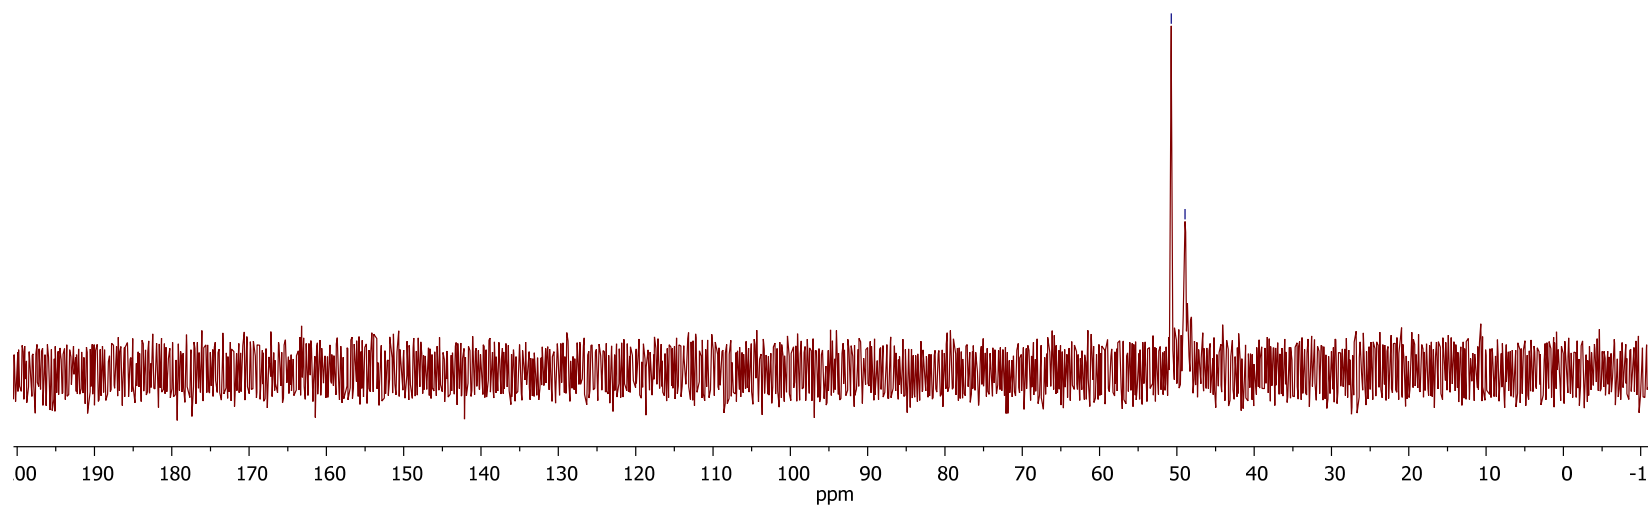

S46

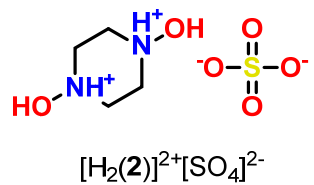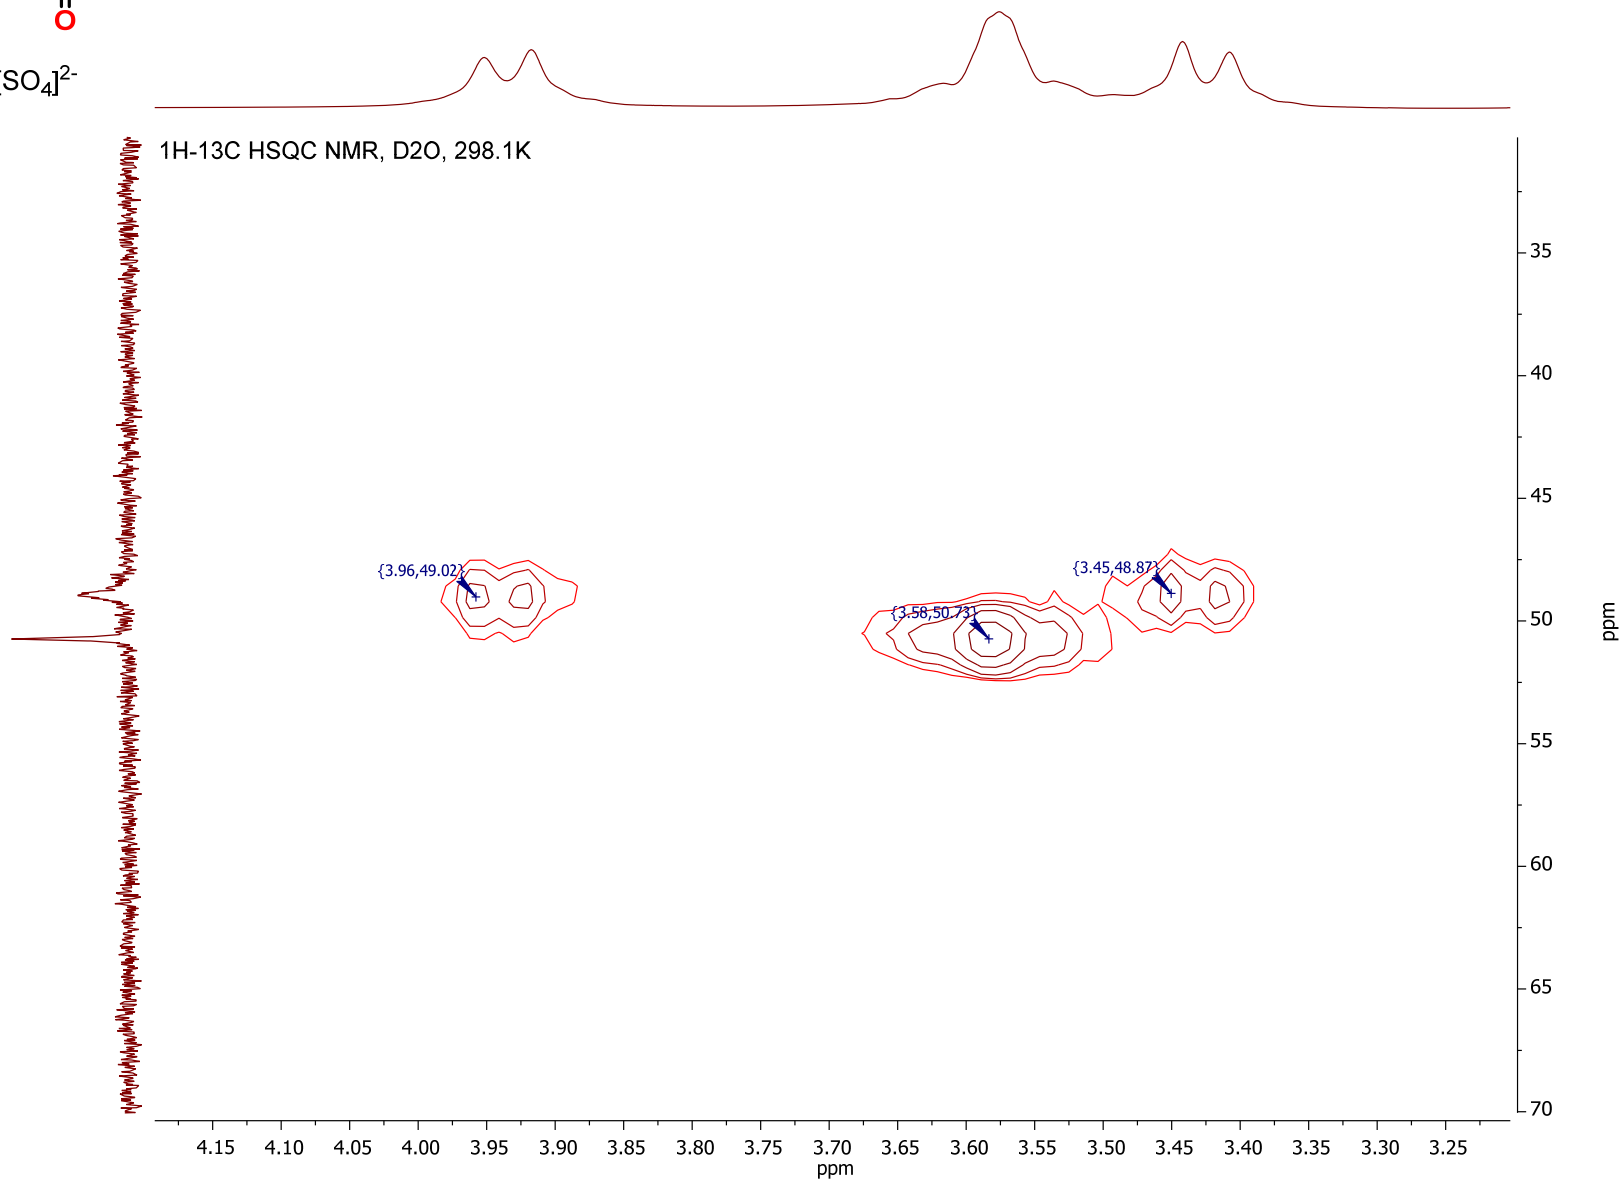

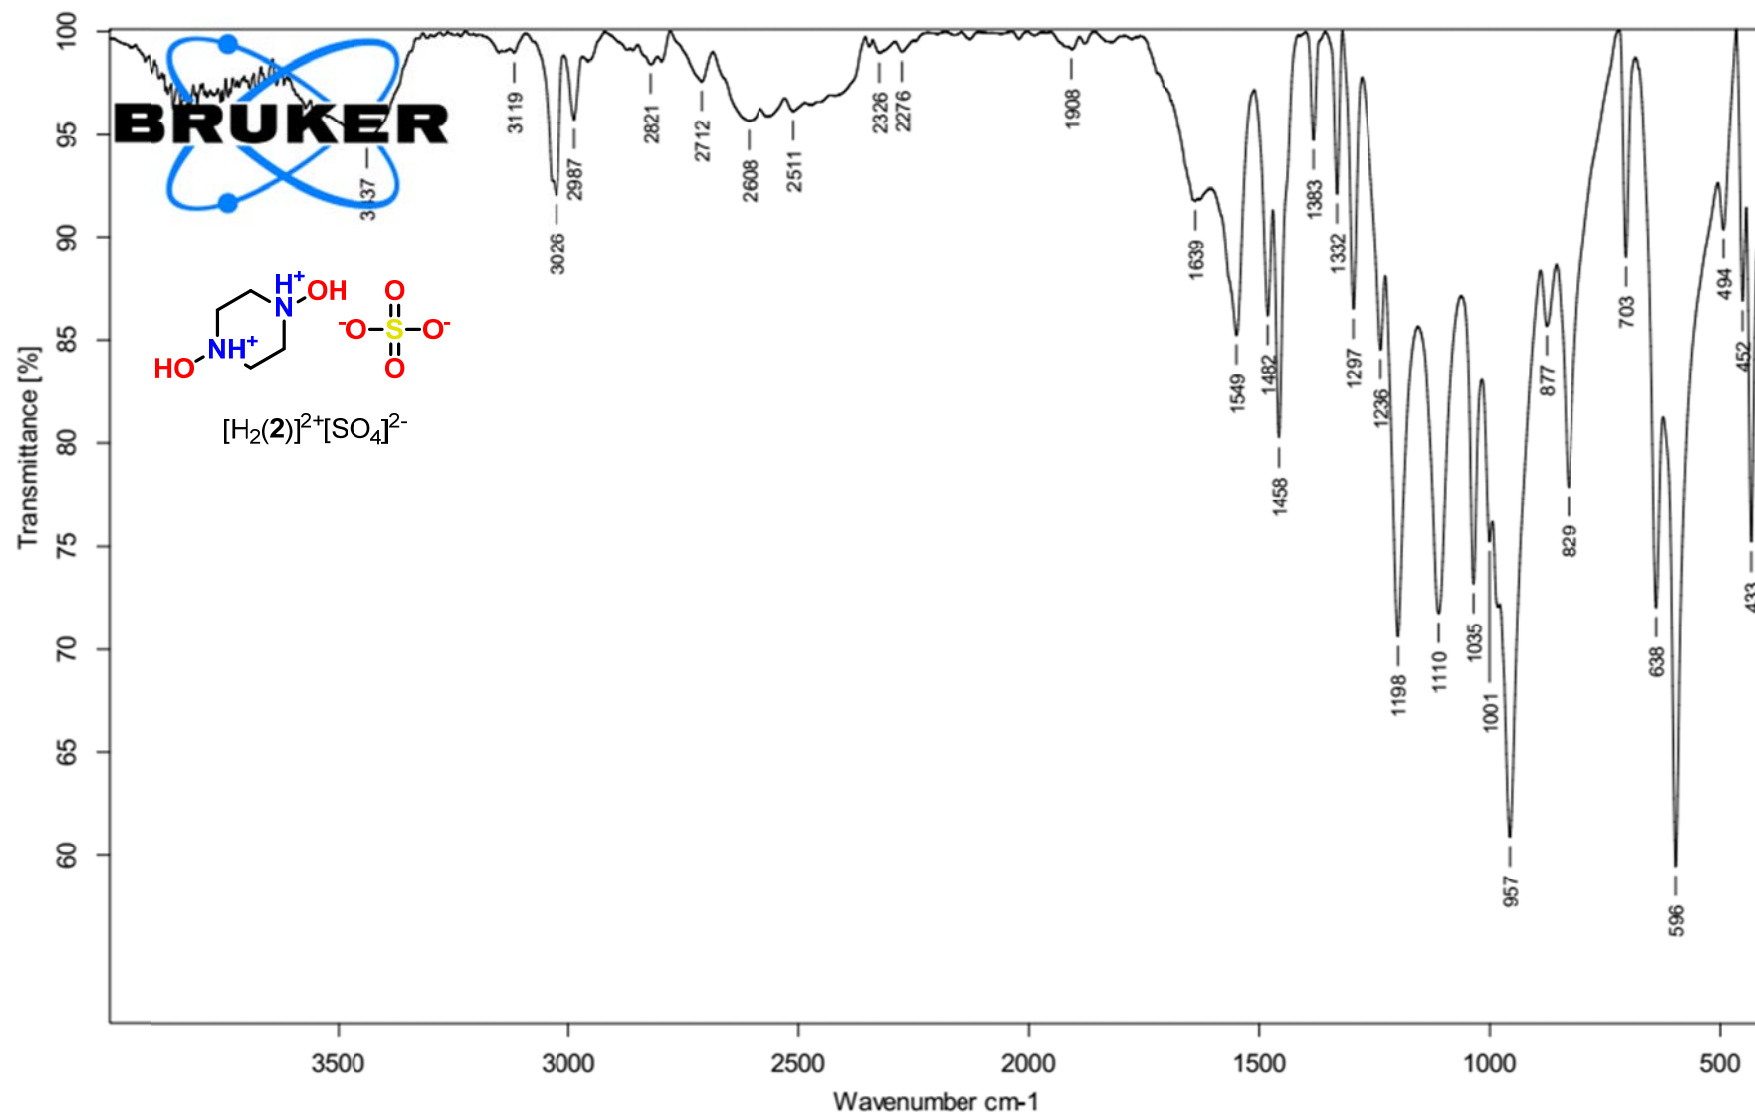

$^1\text{H}$  NMR 300.23MHz, D<sub>2</sub>O, 298.0K

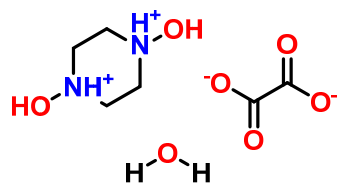

$[\text{H}_2(2)]^{2+}[\text{Ox}]^{2-} \cdot \text{H}_2\text{O}$

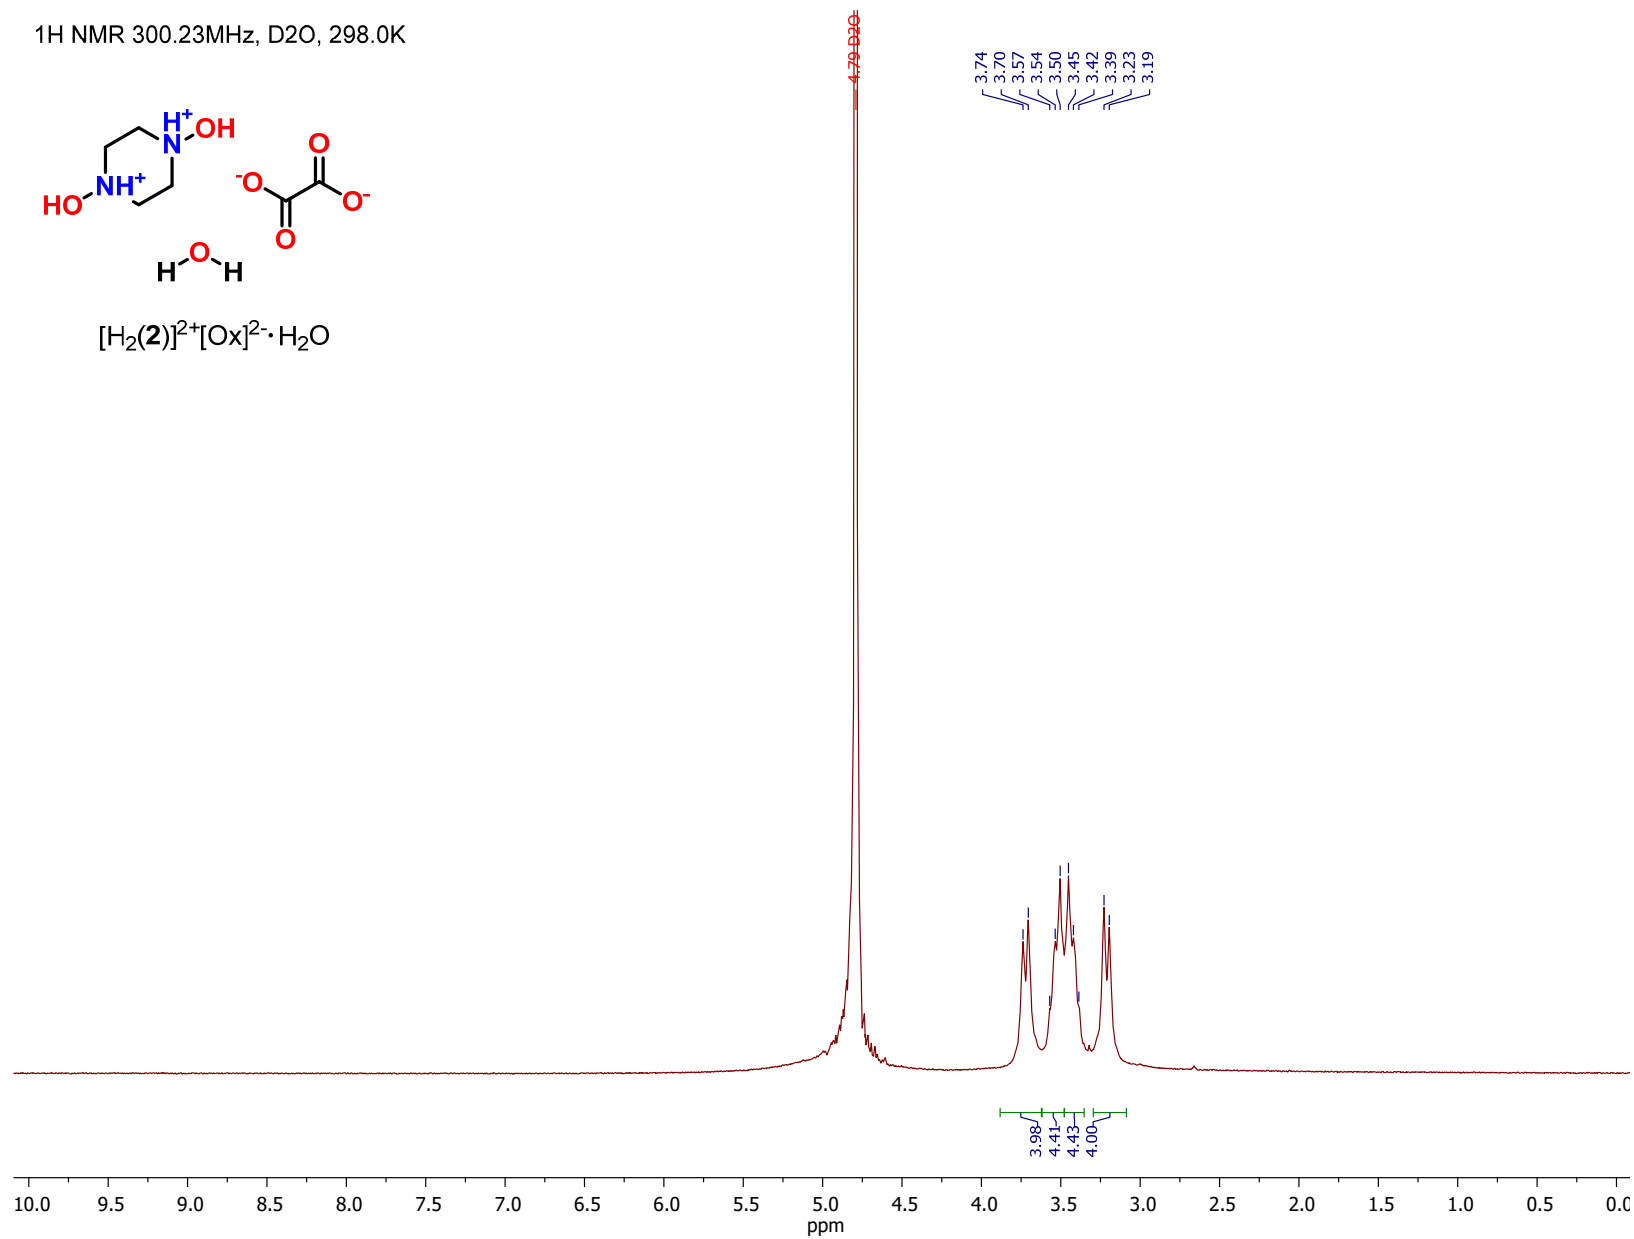

<sup>13</sup>C NMR 75.50MHz, D2O, 298.1K

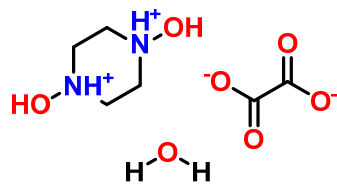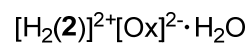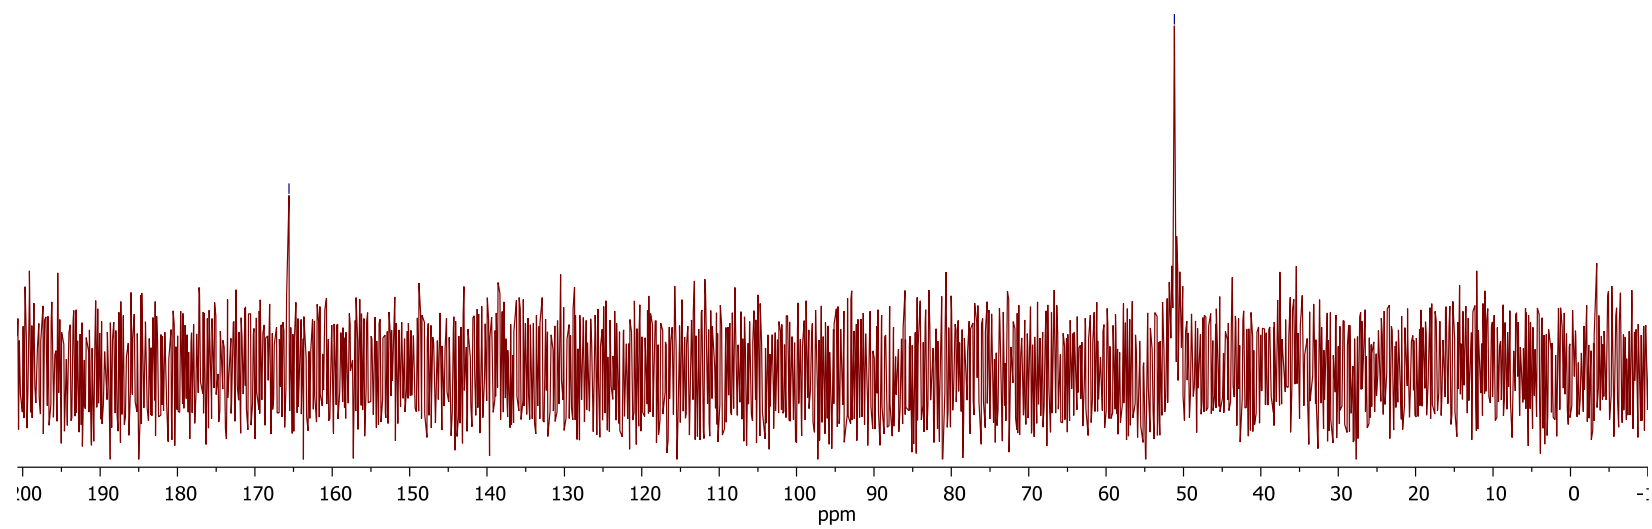

S50

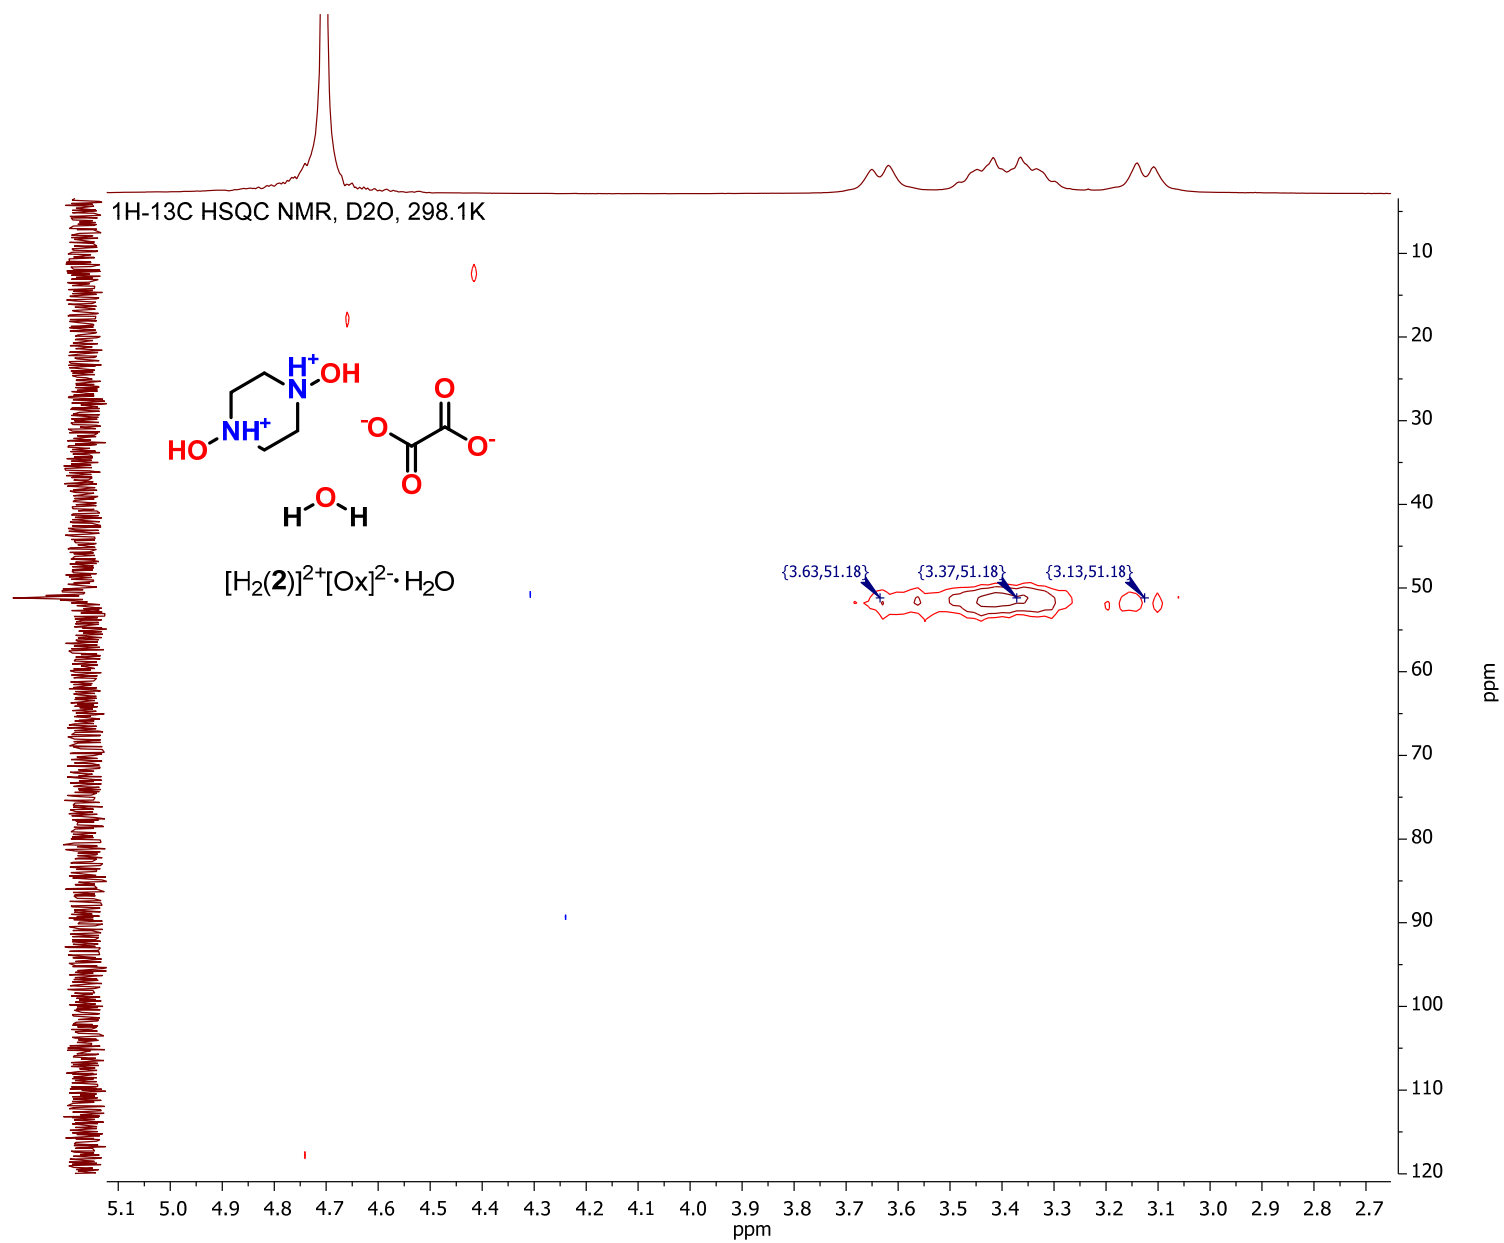

<sup>1</sup>H NMR 300.13MHz, DMSO-d<sub>6</sub>, 300.0K

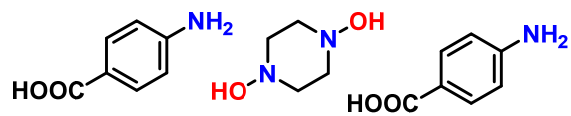

**2·2PABA**

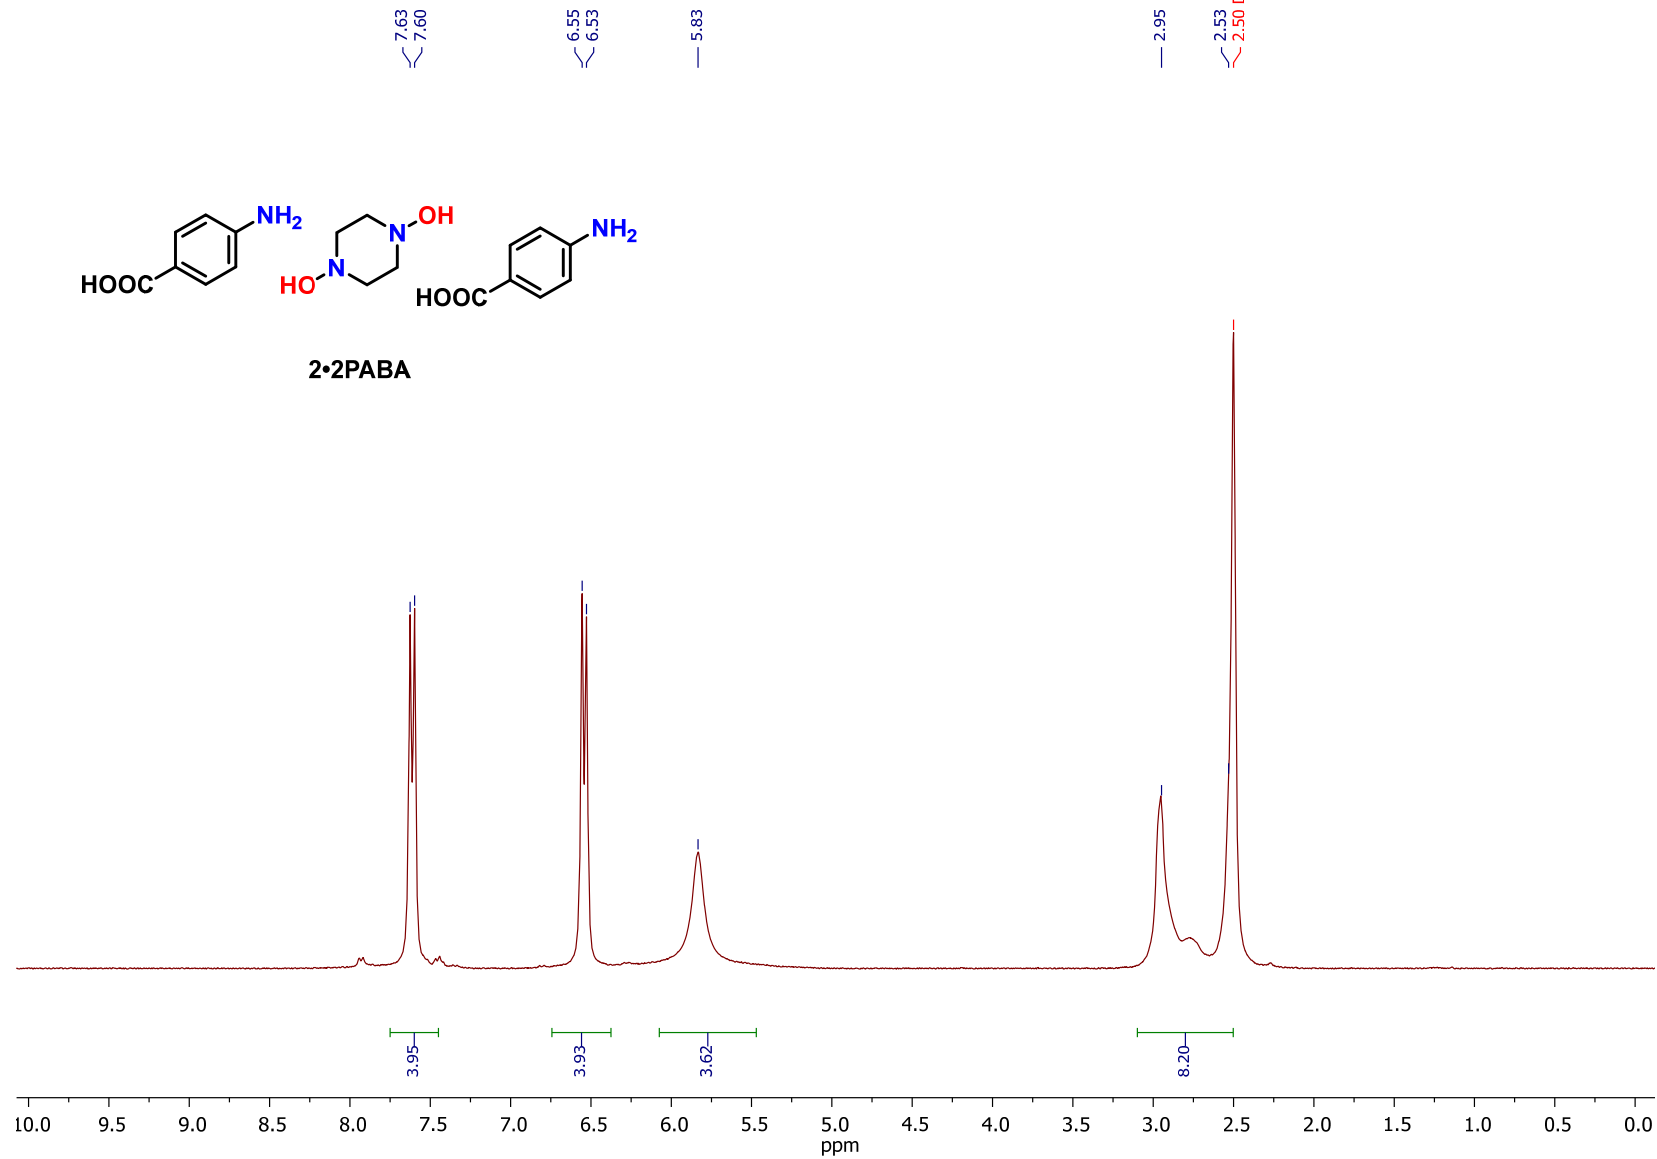

<sup>13</sup>C NMR 75.48MHz, DMSO-d<sub>6</sub>, 300.1K

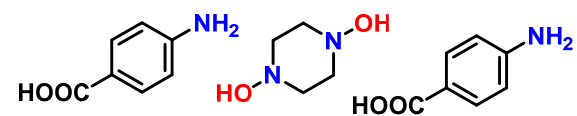

**2·2PABA**

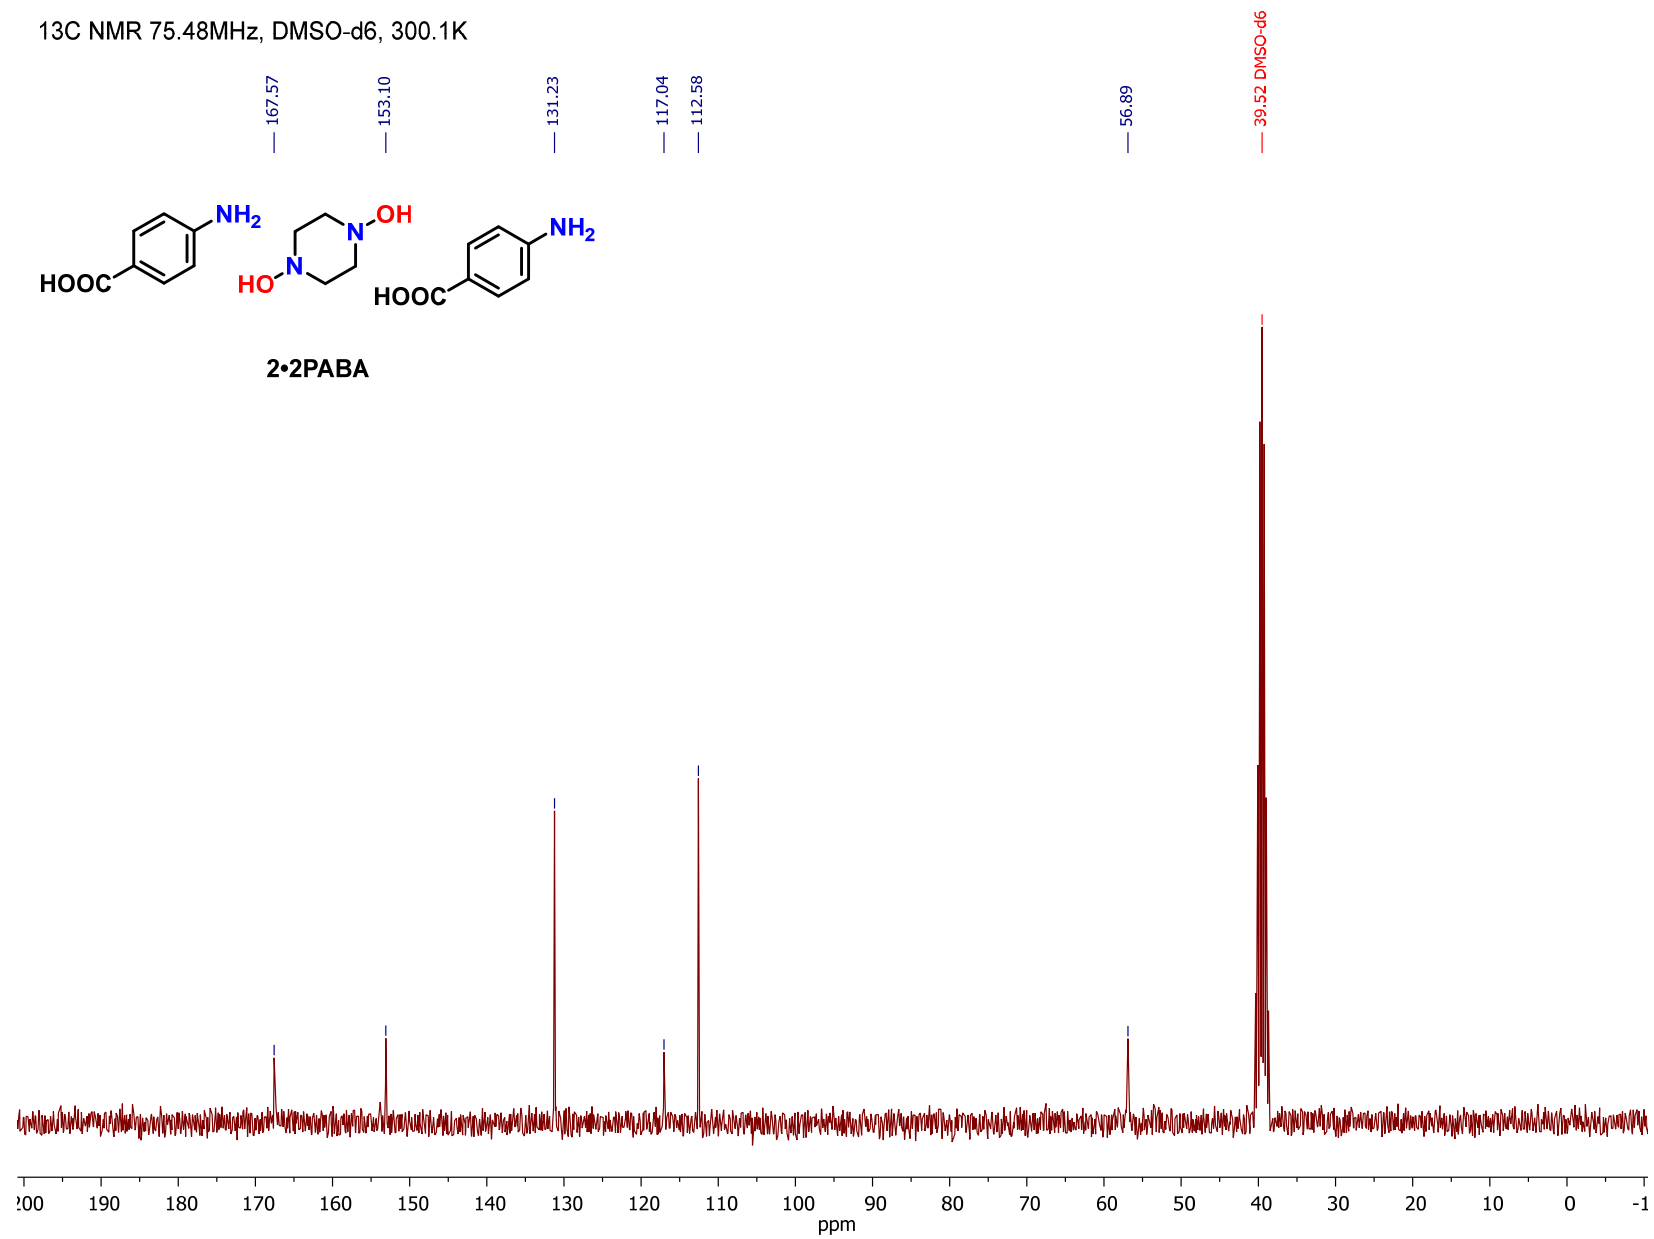

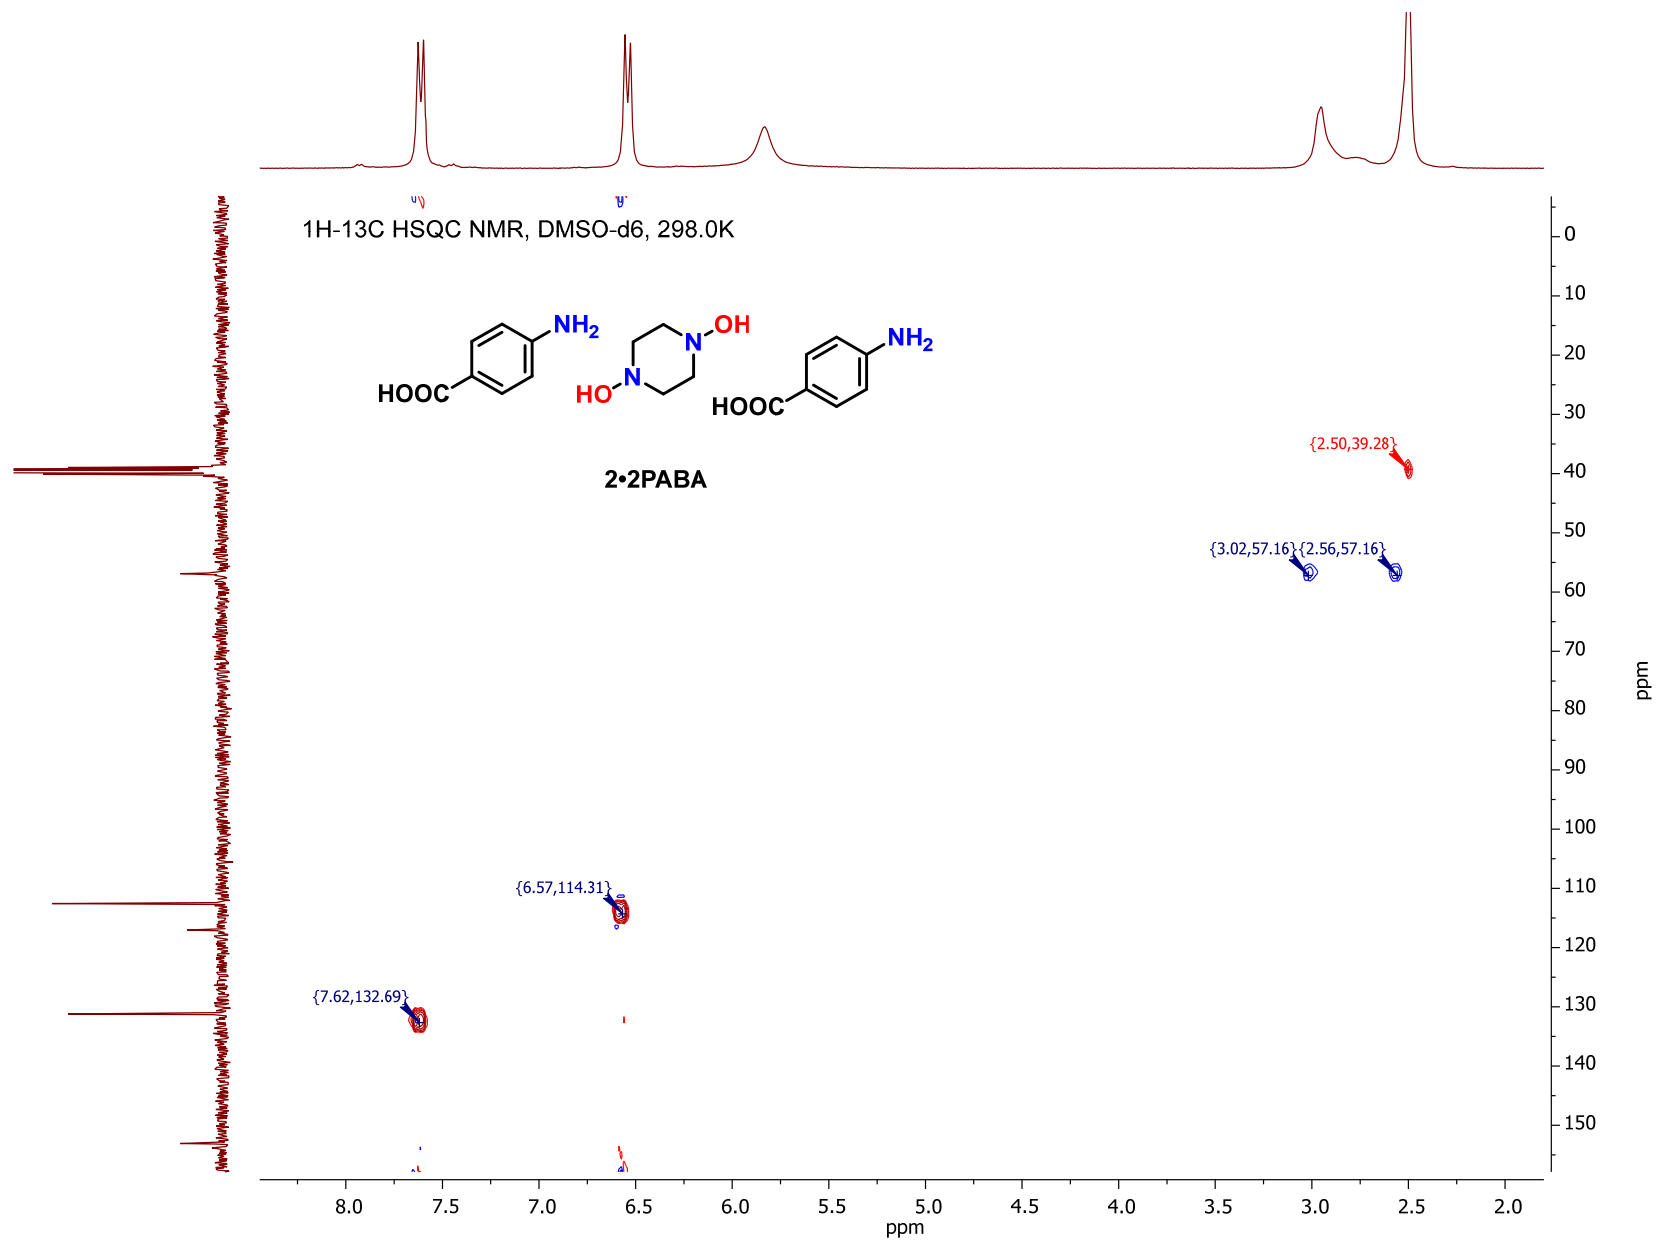

## Dynamic NMR

Full line shape analysis was carried out using TopSpin 4.1.3 DNMR (Dynamic NMR) Lineshape Fitting module. The following model was used with subsequent optimization of the parameters until the best overlap of the simulated and real spectra was achieved by more than 93% (see tables below):

**Table S1.** Fitting model for full line shape analysis.

| Fixed Spectroscopic Model Parameters |                     |   |   |                  |   | Refined Spectroscopic Model Parameters |          |                     |    |    |   |                  |   |   |   |
|--------------------------------------|---------------------|---|---|------------------|---|----------------------------------------|----------|---------------------|----|----|---|------------------|---|---|---|
|                                      | DMSO-d <sub>6</sub> |   |   | D <sub>2</sub> O |   |                                        |          | DMSO-d <sub>6</sub> |    |    |   | D <sub>2</sub> O |   |   |   |
| NEXP                                 | 1                   |   |   | 1                |   |                                        | CONC1    | 4,6E+11             |    |    |   | 8,0E+11          |   |   |   |
| NTASK                                | 3                   |   |   | 3                |   |                                        | CONCD1   | 5,9E+09             |    |    |   | 8,4E+09          |   |   |   |
| NR                                   | 1                   |   |   | 1                |   |                                        | CONCF1   | 1                   |    |    |   | 1                |   |   |   |
| NAT                                  | 2                   | 2 | 1 | 2                | 2 | 1                                      | LB1      | 0                   |    |    |   | 0                |   |   |   |
| NMOL                                 | 1                   | 1 | 1 | 1                | 1 | 1                                      | LBD1     | 0                   |    |    |   | 0                |   |   |   |
| NREAC                                | 1                   | 1 | 1 | 1                | 1 | 1                                      | LBF1     | 1                   |    |    |   | 1                |   |   |   |
| FORCEX                               | 1                   | 1 | 1 | 1                | 1 | 1                                      | DISO1    | 3                   | 3  |    |   | 3                | 3 |   |   |
| LBGROUP                              | 0                   | 0 | 0 | 0                | 0 | 0                                      | DISOD1   | 0                   | 0  |    |   | 0                | 0 |   |   |
| VL                                   | 300                 |   |   | 300              |   |                                        | DISOF1   | 1                   | 1  |    |   | 1                | 1 |   |   |
| O1PSR                                | 6                   |   |   | 6                |   |                                        | SCJ1     | 0                   | -6 | -6 | 0 | 0                | 8 | 8 | 0 |
| F1P                                  | 3                   |   |   | 5                |   |                                        | SCJD1    | 0                   | 0  | 0  | 0 | 0                | 0 | 0 | 0 |
| F2P                                  | 2                   |   |   | 2                |   |                                        | SCJF1    | 0                   | 1  | 1  | 0 | 0                | 1 | 1 | 0 |
| IY                                   | 5,3E+09             |   |   | 2,1E+10          |   |                                        | DELTAH1  | 60                  |    |    |   | 10               |   |   |   |
| B1                                   | 1                   |   |   | 1                |   |                                        | DELTAHD1 | 1                   |    |    |   | 0                |   |   |   |
| B2                                   | 0                   |   |   | 0                |   |                                        | DELTAHF1 | 1                   |    |    |   | 1                |   |   |   |
| PSPIN1                               | 1                   | 1 |   | 1                | 1 |                                        | DELTAS1  | 60                  |    |    |   | 10               |   |   |   |
| MOAT1                                | 1                   | 1 |   | 1                | 1 |                                        | DELTASD1 | 1                   |    |    |   | 0                |   |   |   |
| NXCHG1                               | 2                   |   |   | 2                |   |                                        | DELTASS1 | 1                   |    |    |   | 1                |   |   |   |
| KGROUP1                              | 0                   |   |   | 0                |   |                                        | MOLX1    | 1                   |    |    |   | 1                |   |   |   |
| KAPPAX1                              | 1                   |   |   | 1                |   |                                        | MOLXD1   | 0                   |    |    |   | 0                |   |   |   |
| XFROM1                               | 1                   | 2 |   | 1                | 2 |                                        | MOLXF1   | 0                   |    |    |   | 0                |   |   |   |

|         |    |   |  |    |   |  |          |         |    |    |   |         |    |    |   |
|---------|----|---|--|----|---|--|----------|---------|----|----|---|---------|----|----|---|
| XTO1    | 2  | 1 |  | 2  | 1 |  | CONC2    | 1,2E+11 |    |    |   | 3,8E+11 |    |    |   |
| COEF1   | -1 |   |  | -1 |   |  | CONCD2   | 5,4E+08 |    |    |   | 3,1E+09 |    |    |   |
| XGROUP1 | 0  |   |  | 0  |   |  | CONCF2   | 1       |    |    |   | 1       |    |    |   |
| PSPIN2  | 1  | 1 |  | 1  | 1 |  | LB2      | 10      |    |    |   | 10      |    |    |   |
| MOAT2   | 1  | 1 |  | 1  | 1 |  | LBD2     | 0       |    |    |   | 0       |    |    |   |
| NXCHG2  | 2  |   |  | 2  |   |  | LBF2     | 1       |    |    |   | 1       |    |    |   |
| KGROUP2 | 0  |   |  | 0  |   |  | DISO2    | 3       | 3  |    |   | 3       | 3  |    |   |
| KAPPAX2 | 1  |   |  | 1  |   |  | DISOD2   | 0       | 0  |    |   | 0       | 0  |    |   |
| XFROM2  | 1  | 2 |  | 1  | 2 |  | DISOF2   | 1       | 1  |    |   | 1       | 1  |    |   |
| XTO2    | 2  | 1 |  | 2  | 1 |  | SCJ2     | 0       | -3 | -3 | 0 | 0       | 10 | 10 | 0 |
| COEF2   | -1 |   |  | -1 |   |  | SCJD2    | 0       | 0  | 0  | 0 | 0       | 0  | 0  | 0 |
| XGROUP2 | 0  |   |  | 0  |   |  | SCJF2    | 0       | 1  | 1  | 0 | 0       | 1  | 1  | 0 |
| PSPIN3  | 3  |   |  | 1  |   |  | DELTAH2  | 123     |    |    |   | 19      |    |    |   |
| MOAT3   | 1  |   |  | 1  |   |  | DELTAHD2 | 6       |    |    |   | 0       |    |    |   |
| NXCHG3  | 2  |   |  | 2  |   |  | DELTAHF2 | 1       |    |    |   | 1       |    |    |   |
| KGROUP3 | 0  |   |  | 0  |   |  | DELTAS2  | 123     |    |    |   | 19      |    |    |   |
| KAPPAX3 | 1  |   |  | 1  |   |  | DELTASD2 | 6       |    |    |   | 0       |    |    |   |
| XFROM3  | 1  | 1 |  | 1  | 1 |  | DELTASS2 | 1       |    |    |   | 1       |    |    |   |
| XTO3    | 1  | 1 |  | 1  | 1 |  | MOLX2    | 1       |    |    |   | 1       |    |    |   |
| COEF3   | -1 |   |  | -1 |   |  | MOLXD2   | 0       |    |    |   | 0       |    |    |   |
| XGROUP3 | 0  |   |  | 0  |   |  | MOLXF2   | 0       |    |    |   | 0       |    |    |   |
| END     |    |   |  |    |   |  | CONC3    | 8,0E+08 |    |    |   | 8,5E+11 |    |    |   |
|         |    |   |  |    |   |  | CONCD3   | 3,8E+06 |    |    |   | 7,2E+09 |    |    |   |
|         |    |   |  |    |   |  | CONCF3   | 1       |    |    |   | 1       |    |    |   |
|         |    |   |  |    |   |  | LB3      | 12      |    |    |   | 10      |    |    |   |
|         |    |   |  |    |   |  | LBD3     | 0       |    |    |   | 0       |    |    |   |
|         |    |   |  |    |   |  | LBF3     | 1       |    |    |   | 1       |    |    |   |
|         |    |   |  |    |   |  | DISO3    | 3       |    |    |   | 5       |    |    |   |
|         |    |   |  |    |   |  | DISOD3   | 0       |    |    |   | 0       |    |    |   |

|  |  |  |  |  |  |          |    |  |  |  |    |  |  |  |
|--|--|--|--|--|--|----------|----|--|--|--|----|--|--|--|
|  |  |  |  |  |  | DISOF3   | 1  |  |  |  | 1  |  |  |  |
|  |  |  |  |  |  | SCJ3     | 0  |  |  |  | 0  |  |  |  |
|  |  |  |  |  |  | SCJD3    | 0  |  |  |  | 0  |  |  |  |
|  |  |  |  |  |  | SCJF3    | 0  |  |  |  | 0  |  |  |  |
|  |  |  |  |  |  | DELTAH3  | 50 |  |  |  | 50 |  |  |  |
|  |  |  |  |  |  | DELTAHD3 | 0  |  |  |  | 0  |  |  |  |
|  |  |  |  |  |  | DELTAHF3 | 0  |  |  |  | 0  |  |  |  |
|  |  |  |  |  |  | DELTAS3  | 50 |  |  |  | 50 |  |  |  |
|  |  |  |  |  |  | DELTASD3 | 0  |  |  |  | 0  |  |  |  |
|  |  |  |  |  |  | DELTASS3 | 0  |  |  |  | 0  |  |  |  |
|  |  |  |  |  |  | MOLX3    | 1  |  |  |  | 1  |  |  |  |
|  |  |  |  |  |  | MOLXD3   | 0  |  |  |  | 0  |  |  |  |
|  |  |  |  |  |  | MOLXF3   | 0  |  |  |  | 0  |  |  |  |
|  |  |  |  |  |  | END      |    |  |  |  |    |  |  |  |

**Table S2.** Full line shape analysis for spectra in D<sub>2</sub>O

| T, K   | System 1 |        |         |              | System 2 |        |         |              | Best overlap, % |
|--------|----------|--------|---------|--------------|----------|--------|---------|--------------|-----------------|
|        | ATOM     |        | k[Hz]   | ΔG‡, cal/mol | ATOM     |        | k[Hz]   | ΔG‡, cal/mol |                 |
|        | 1        | 2      | 1 ↔ 2   |              | 1        | 2      | 1 ↔ 2   |              |                 |
| 288,15 | 3.0021   | 2.5137 | 6.73392 | 15757        | 2.8948   | 2.7813 | 22.778  | 15059        | 93,01           |
| 298,15 | 3.1327   | 2.643  | 11.4644 | 16004        | 3.0281   | 2.9019 | 32.8346 | 15384        | 95,79           |
| 308,15 | 3.2037   | 2.7131 | 17.2686 | 16311        | 3.1018   | 2.9712 | 46.9927 | 15699        | 94,08           |
| 318,15 | 3.3021   | 2.8109 | 27.7688 | 16561        | 3.2147   | 3.0599 | 67.2526 | 16002        | 96,71           |
| 328,15 | 3.3962   | 2.907  | 57.9362 | 16623        | 3.3475   | 3.1411 | 124.74  | 16123        | 97,14           |
| 338,15 | 3.4974   | 3.0386 | 99.2219 | 16788        | 3.525    | 3.2508 | 152.777 | 16498        | 94,37           |

**Table S3.** Full line shape analysis for spectra in DMSO-*d*<sub>6</sub>

| T, K   | System 1 |        |         |              | System 2 |        |         |              | Best overlap, % |
|--------|----------|--------|---------|--------------|----------|--------|---------|--------------|-----------------|
|        | ATOM     |        | k[Hz]   | ΔG‡, cal/mol | ATOM     |        | k[Hz]   | ΔG‡, cal/mol |                 |
|        | 1        | 2      | 1 ↔ 2   |              | 1        | 2      | 1 ↔ 2   |              |                 |
| 298,15 | 2.9667   | 2.5166 | 60.1092 | 15025        | 2.9749   | 2.7371 | 123.307 | 14599        | 98.36           |
| 338,15 | 3.0224   | 2.4841 | 404.935 | 15843        | 3.0647   | 2.7142 | 510.819 | 15687        | 97.87           |

<sup>1</sup>H NMR 300.23MHz, D<sub>2</sub>O, 288.0K

<sup>1</sup>H NMR 300.23MHz, D<sub>2</sub>O, 298.0K

<sup>1</sup>H NMR 300.23MHz, D<sub>2</sub>O, 308.1K

<sup>1</sup>H NMR 300.23MHz, D<sub>2</sub>O, 318.1K

<sup>1</sup>H NMR 300.23MHz, D<sub>2</sub>O, 328.2K

<sup>1</sup>H NMR 300.23MHz, D<sub>2</sub>O, 338.1K

<sup>1</sup>H NMR 300.23MHz, D<sub>2</sub>O, 297.9K

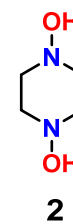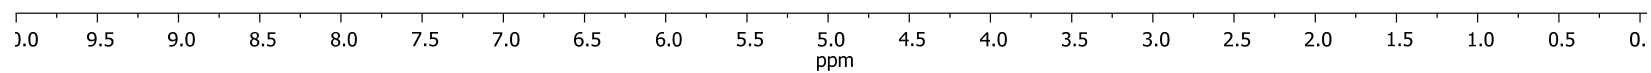

<sup>1</sup>H NMR 600.13MHz, D<sub>2</sub>O, 282.6K

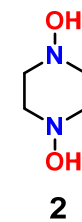

<sup>1</sup>H NMR 600.13MHz, D<sub>2</sub>O, 298.4K

<sup>1</sup>H NMR 600.13MHz, D<sub>2</sub>O, 353.1K

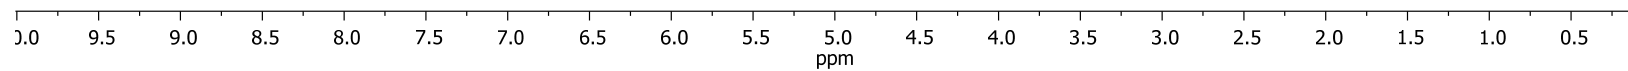

S60

<sup>13</sup>C-<sup>13</sup>C 1D NMR, D<sub>2</sub>O, 283.3K

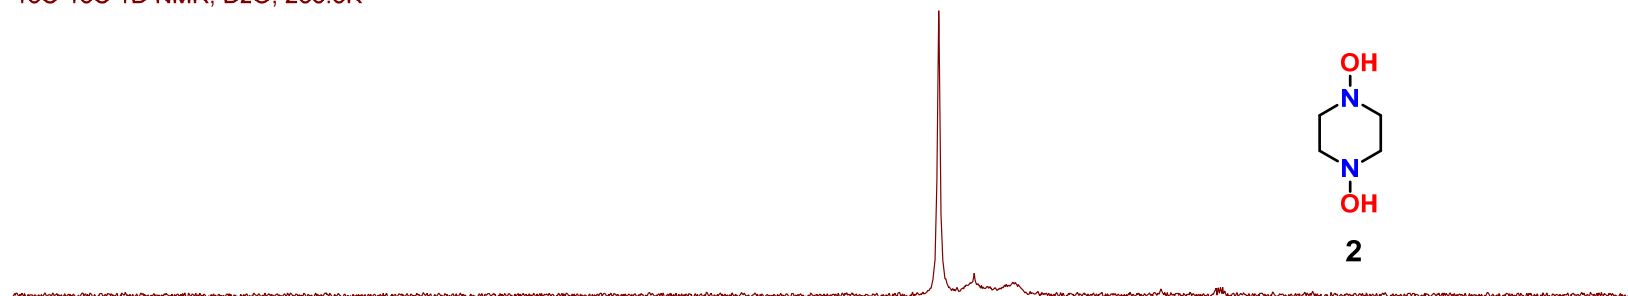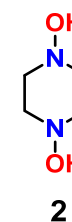

<sup>13</sup>C-<sup>13</sup>C 1D NMR, D<sub>2</sub>O, 300.1K

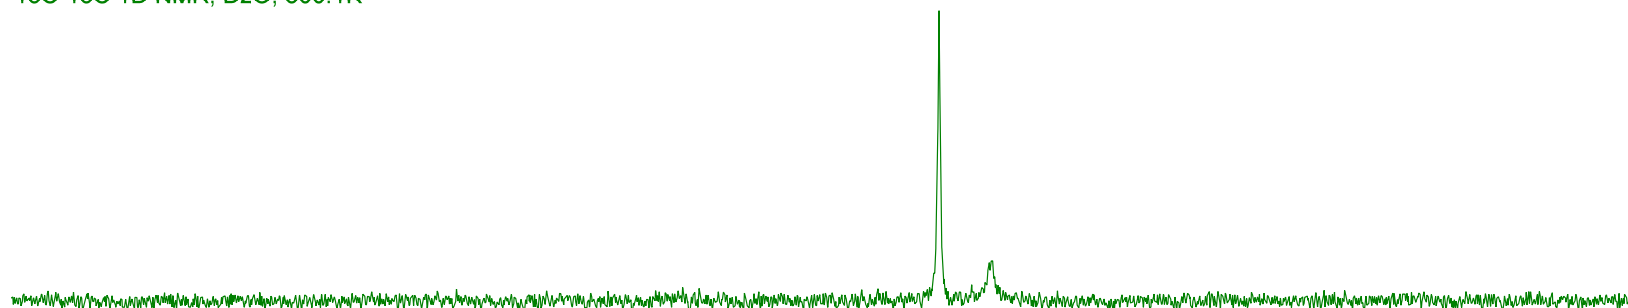

<sup>13</sup>C-<sup>13</sup>C 1D NMR, D<sub>2</sub>O, 353.3K

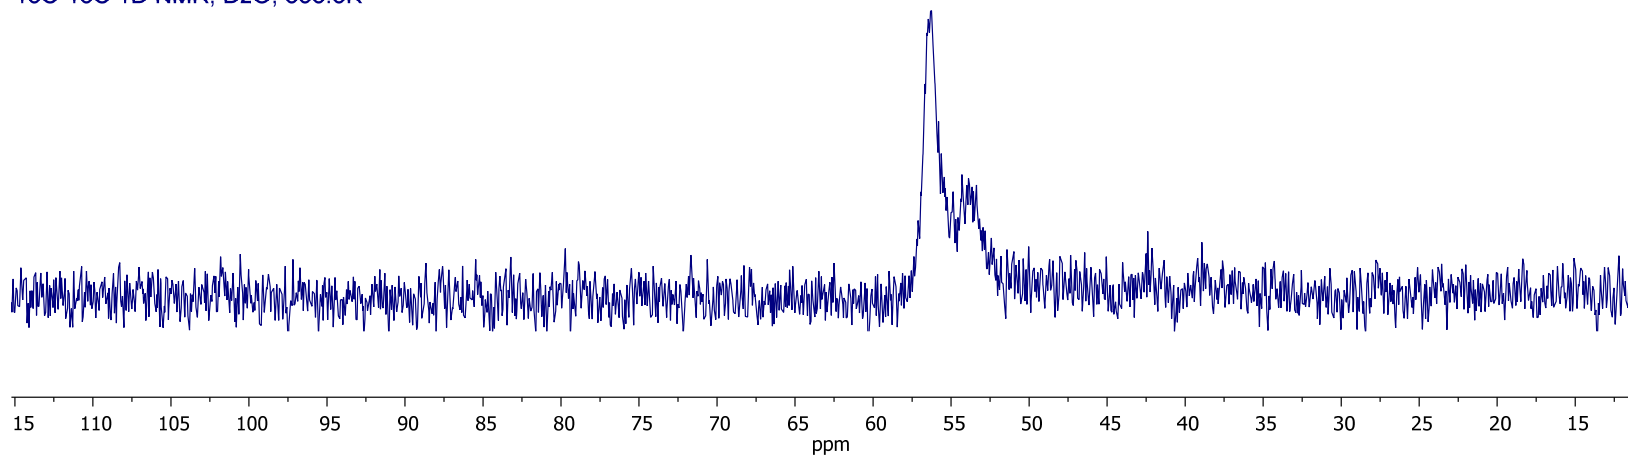

<sup>1</sup>H NMR 300.23MHz, DMSO-d<sub>6</sub>, 338.2K

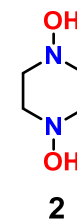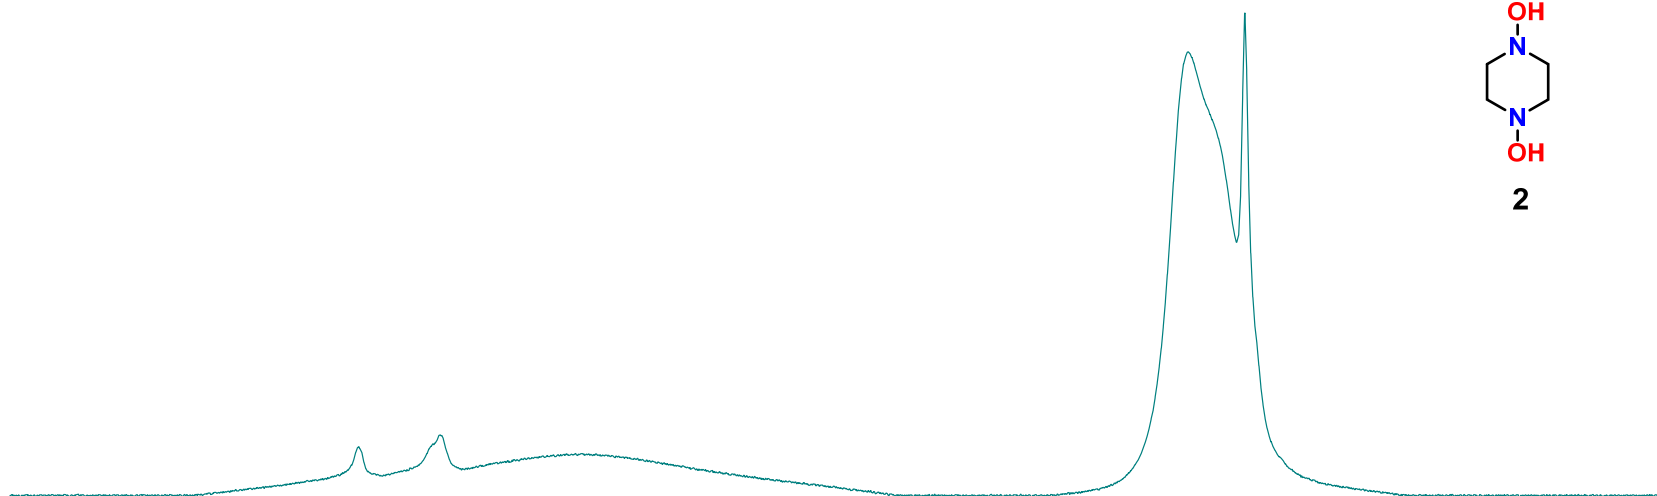

<sup>1</sup>H NMR 300.23MHz, DMSO-d<sub>6</sub>, 298.0K

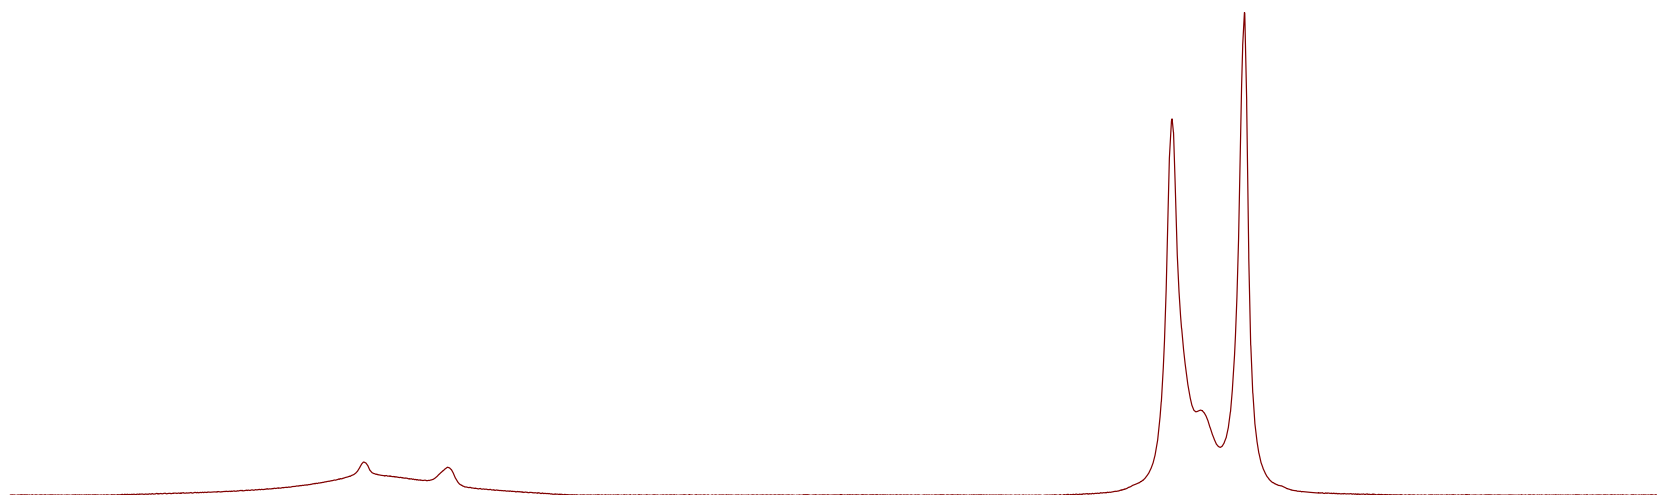

S62

10.0 9.5 9.0 8.5 8.0 7.5 7.0 6.5 6.0 5.5 5.0 4.5 4.0 3.5 3.0 2.5 2.0 1.5 1.0 0.5 0.0  
ppm

## DFT calculations

### Conformations search

Conformational search was performed with meta-dynamics driven search algorithm CREST v2.11.2<sup>3</sup> using GFN2-xtb semiempirical tight-binding method<sup>4</sup> implemented in XTB v6.4.1 program. Resulting molecular ensemble was sorted using CENSO v.1.2.0 code<sup>5</sup> and ORCA v.5.0.3<sup>6</sup> quantum chemistry package. CENSO routine consisted of:

part0: b97-d3/def2-SV(P) // GFNn-xTB (Input geometry)

part1: r2scan-3c + SMD[chcl3] + GmRRHO(GFN2[alpb]-bhess) // GFNn-xTB (Input geometry)

part2: r2scan-3c + SMD[chcl3] + GmRRHO(GFN2[alpb]-bhess) // r2scan-3c[SMD]

part3: pw6b95-d4/def2-TZVPD + SMD[chcl3] + GmRRHO(GFN2[alpb]-bhess) // r2scan-3c[SMD]

### DFT calculation of thermodynamic parameters and nitrogen inversion barrier

DFT calculations were performed with the Gaussian 16 Rev C.01.<sup>7</sup> M11 DFT functional with Def2TZVP basis set was used for geometry optimization, calculations of thermodynamics and kinetics. Calculations were performed in

---

<sup>3</sup> Pracht, P.; Bohle, F.; Grimme, S. Automated Exploration of the Low-Energy Chemical Space with Fast Quantum Chemical Methods. *Phys. Chem. Chem. Phys.* **2020**, 22 (14), 7169–7192.

<sup>4</sup> Bannwarth, C.; Ehlert, S.; Grimme, S. GFN2-XTB - An Accurate and Broadly Parametrized Self-Consistent Tight-Binding Quantum Chemical Method with Multipole Electrostatics and Density-Dependent Dispersion Contributions. *J. Chem. Theory Comput.* **2019**, 15 (3), 1652–1671.

<sup>5</sup> Grimme, S.; Bohle, F.; Hansen, A.; Pracht, P.; Spicher, S.; Stahn, M. Efficient Quantum Chemical Calculation of Structure Ensembles and Free Energies for Nonrigid Molecules. *J. Phys. Chem. A* **2021**, 125 (19), 4039–4054.

<sup>6</sup> Neese, F. Software update: The ORCA program system—Version 5.0. *WIREs Comput Mol Sci.* **2022**, e1606.

<sup>7</sup> Frisch, M. J.; Trucks, G. W.; Schlegel, H. B.; Scuseria, G. E.; Robb, M. A.; Cheeseman, J. R.; Scalmani, G.; Barone, V.; Petersson, G. A.; Nakatsuji, H.; Li, X.; Caricato, M.; Marenich, A. V.; Bloino, J.; Janesko, B. G.; Gomperts, R.; Mennucci, B.; Hratchian, H. P.; Ortiz, J. V.; Izmaylov, A. F.; Sonnenberg, J. L.; Williams-Young, D.; Ding, F.; Lipparini, F.; Egidi, F.; Goings, J.; Peng, B.; Petrone, A.; Henderson, T.; Ranasinghe, D.; Zakrzewski, V. G.; Gao, J.; Rega, N.; Zheng, G.; Liang, W.; Hada, M.; Ehara, M.; Toyota, K.; Fukuda, R.; Hasegawa, J.; Ishida, M.; Nakajima, T.; Honda, Y.; Kitao, O.; Nakai, H.; Vreven, T.; Throssell, K.; Montgomery, J. A., Jr.; Peralta, J. E.; Ogliaro, F.; Bearpark, M. J.; Heyd, J. J.; Brothers, E. N.; Kudin, K. N.; Staroverov, V. N.; Keith, T. A.; Kobayashi, R.; Normand, J.; Raghavachari, K.; Rendell, A. P.; Burant, J. C.; Iyengar, S. S.; Tomasi, J.; Cossi, M.; Millam, J. M.; Klene, M.; Adamo, C.; Cammi, R.; Ochterski, J. W.; Martin, R. L.; Morokuma, K.; Farkas, O.; Foresman, J. B.; Fox, D. J. Gaussian, Inc., Wallingford CT, **2016**.

water (SMD model), the approach of Martin and co-workers was followed.<sup>8</sup> Cartesian coordinates are given in angstroms; absolute energies for all substances are given in hartrees. Analysis of vibrational frequencies was performed for all optimized structures. All compounds, except transition state structures, were characterized by only real vibrational frequencies. TS was characterized by one imaginary frequency. Wavefunction stability, using stable keyword, was also checked for each molecule

For calculations of optimized geometries, frequencies, thermodynamics and kinetics following keywords were used:

```
# opt=(calcfc) freq M11/Def2TZVP scf=xqc scrf=(smd,solvent=water) nosymm  
pressure=1358 temperature=298.15 test
```

The same parameters were calculated for transition state structure with keywords:

```
# opt=(calcfc,ts,noeigentest) freq M11/Def2TZVP scf=xqc scrf=(smd,solvent=water) nosymm  
pressure=1358 temperature=298.15 test
```

IRC calculation was performed for TS and proved that TS connects products and reactants:

```
# irc=(forward,calcfc,maxcycle=150,MaxPoints=15,HPC) scf=xqc M11/Def2TZVP
```

```
scrf=(smd,solvent=water) geom=checkpoint guess=(read) nosymm pressure=1358  
temperature=298.15 test
```

```
# irc=(reverse,calcfc,maxcycle=150,MaxPoints=15,HPC) scf=xqc M11/Def2TZVP
```

```
scrf=(smd,solvent=water) geom=checkpoint guess=(read) nosymm pressure=1358  
temperature=298.15 test
```

---

<sup>8</sup> Martin, R. L.; Hay, P. J.; Pratt, L. R. Hydrolysis of Ferric Ion in Water and Conformational Equilibrium. *J. Phys. Chem. A* **1998**, *102*, 3565.

## Relative stability of conformers/invertomers of PipzDiol 2

**Table S4.** Relative stability of conformers/invertomers of PipzDiol 2

| Structure      | $\Delta E_0$ Kcal/mol | $\Delta G^0_{298,15K}$ Kcal/mol |
|----------------|-----------------------|---------------------------------|
| <i>ax,ax-2</i> | +0.6                  | +1.3                            |
| <i>ax,eq-2</i> | 0                     | 0                               |
| <i>eq,eq-2</i> | +0.2                  | +0.1                            |

ax,ax-2

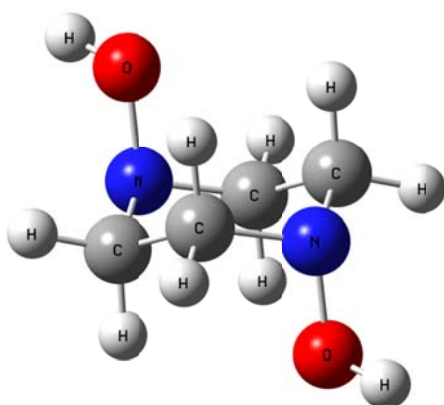

Charge 0; multiplicity 1

|   |             |             |             |
|---|-------------|-------------|-------------|
| C | 0.76417300  | -0.89302900 | 0.00692300  |
| C | 0.93420500  | 0.59897700  | -0.24391600 |
| N | -0.16932600 | 1.39855300  | 0.30230000  |
| C | -1.44610600 | 0.87790600  | -0.20118100 |
| C | -1.61613300 | -0.61409800 | 0.04966500  |
| N | -0.51260500 | -1.41366900 | -0.49656800 |
| O | -0.16946600 | 1.18507400  | 1.72291600  |
| O | -0.51245500 | -1.20015600 | -1.91717800 |
| H | 0.78300300  | -1.10163700 | 1.08137200  |
| H | 1.57726800  | -1.45319200 | -0.46200600 |
| H | 0.96286200  | 0.80188100  | -1.31925200 |
| H | 1.87055700  | 0.95467200  | 0.19381600  |
| H | -1.46494300 | 1.08650600  | -1.27563100 |
| H | -2.25919900 | 1.43807100  | 0.26774900  |
| H | -2.55249000 | -0.96979400 | -0.38805700 |
| H | -1.64477700 | -0.81700400 | 1.12500100  |
| H | -0.04657500 | 2.06019100  | 2.10530800  |
| H | -0.63564500 | -2.07522100 | -2.29959200 |

|                                                 |                              |
|-------------------------------------------------|------------------------------|
| DFT M11/Def2TZVP, solvent water, SMD model      |                              |
| Total electronic energy=                        | -418.277000 $E_0$            |
| Sum of electronic and zero-point Energies=      | -418.121748 $E_0 + E_{ZPE}$  |
| Sum of electronic and thermal Energies=         | -418.114050 $E_0 + E_{tot}$  |
| Sum of electronic and thermal Enthalpies=       | -418.113105 $E_0 + H_{corr}$ |
| Sum of electronic and thermal Free Energies=    | -418.146320 $E_0 + G_{corr}$ |
| Zero-point correction ( <i>unscaled</i> ) =     | 0.155252                     |
| Number of imaginary vibrational frequencies = 0 |                              |

ax,eq-2

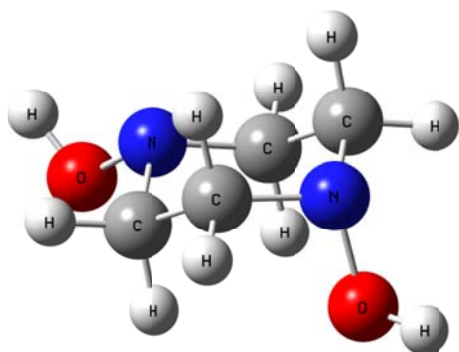

Charge 0; multiplicity 1

|   |             |             |             |
|---|-------------|-------------|-------------|
| C | 1.11620900  | -0.86463400 | 0.25137700  |
| C | 1.26082400  | 0.60799300  | -0.10196100 |
| N | 0.12857900  | 1.42195300  | 0.34700700  |
| C | -1.12188100 | 0.82650900  | -0.13022200 |
| C | -1.25502000 | -0.64735000 | 0.22188000  |
| N | -0.11964600 | -1.38036500 | -0.33632400 |
| O | 0.10463500  | 1.34705500  | 1.77928800  |
| O | -0.25140300 | -2.73194600 | 0.11651100  |
| H | 1.09620600  | -1.00008600 | 1.34396500  |
| H | 1.96175800  | -1.42662400 | -0.15377900 |
| H | 1.32040400  | 0.72705200  | -1.18895600 |
| H | 2.17538300  | 1.01174000  | 0.33816300  |
| H | -1.13395100 | 0.95320900  | -1.21789600 |
| H | -1.95811100 | 1.38949900  | 0.29038200  |
| H | -2.17823400 | -1.04768900 | -0.20508300 |
| H | -1.28697800 | -0.78208400 | 1.31434600  |
| H | 0.18966500  | 2.25914100  | 2.07686400  |
| H | -0.25899000 | -3.27126100 | -0.68184100 |

|                                                 |                                                |
|-------------------------------------------------|------------------------------------------------|
| DFT M11/Def2TZVP, solvent water, SMD model      |                                                |
| Total electronic energy=                        | -418.277941 E <sub>0</sub>                     |
| Sum of electronic and zero-point Energies=      | -418.123170 E <sub>0</sub> + E <sub>ZPE</sub>  |
| Sum of electronic and thermal Energies=         | -418.115175 E <sub>0</sub> + E <sub>tot</sub>  |
| Sum of electronic and thermal Enthalpies=       | -418.114231 E <sub>0</sub> + H <sub>corr</sub> |
| Sum of electronic and thermal Free Energies=    | -418.148351 E <sub>0</sub> + G <sub>corr</sub> |
| Zero-point correction ( <i>unscaled</i> ) =     | 0.154772                                       |
| Number of imaginary vibrational frequencies = 0 |                                                |

eq,eq-2

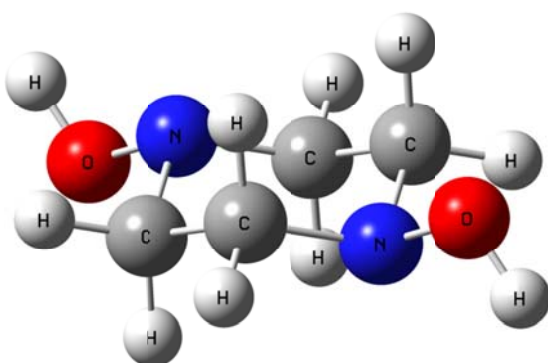

Charge 0; multiplicity 1

|   |             |             |             |
|---|-------------|-------------|-------------|
| C | 1.12016200  | -0.83384400 | 0.22162000  |
| C | 1.25700200  | 0.61585500  | -0.19807700 |
| N | 0.12437400  | 1.38012200  | 0.32272800  |
| C | -1.11790600 | 0.83346700  | -0.22201300 |
| C | -1.25474600 | -0.61623200 | 0.19768400  |
| N | -0.12211800 | -1.38049800 | -0.32312200 |
| O | 0.25226500  | 2.70132900  | -0.20624900 |
| O | -0.25000800 | -2.70170700 | 0.20585100  |
| H | 1.11473500  | -0.91394200 | 1.32006500  |
| H | 1.96079700  | -1.41306700 | -0.16794600 |
| H | 1.28790200  | 0.69352200  | -1.29635200 |
| H | 2.18090900  | 1.03392300  | 0.20870500  |
| H | -1.11248000 | 0.91356400  | -1.32045800 |
| H | -1.95854100 | 1.41269000  | 0.16755300  |
| H | -2.17865400 | -1.03430000 | -0.20909700 |
| H | -1.28564500 | -0.69389900 | 1.29596000  |
| H | 0.27353600  | 3.28563500  | 0.55951300  |
| H | -0.27131300 | -3.28600700 | -0.55991400 |

|                                                 |             |                         |
|-------------------------------------------------|-------------|-------------------------|
| DFT M11/Def2TZVP, solvent water, SMD model      |             |                         |
| Total electronic energy=                        | -418.277605 | $E_0$                   |
| Sum of electronic and zero-point Energies=      | -418.122941 | $E_0 + E_{\text{ZPE}}$  |
| Sum of electronic and thermal Energies=         | -418.114893 | $E_0 + E_{\text{tot}}$  |
| Sum of electronic and thermal Enthalpies=       | -418.113949 | $E_0 + H_{\text{corr}}$ |
| Sum of electronic and thermal Free Energies=    | -418.148180 | $E_0 + G_{\text{corr}}$ |
| Zero-point correction ( <i>unscaled</i> ) =     | 0.154664    |                         |
| Number of imaginary vibrational frequencies = 0 |             |                         |

## Inversion of nitrogen atom in PipzDiol 2

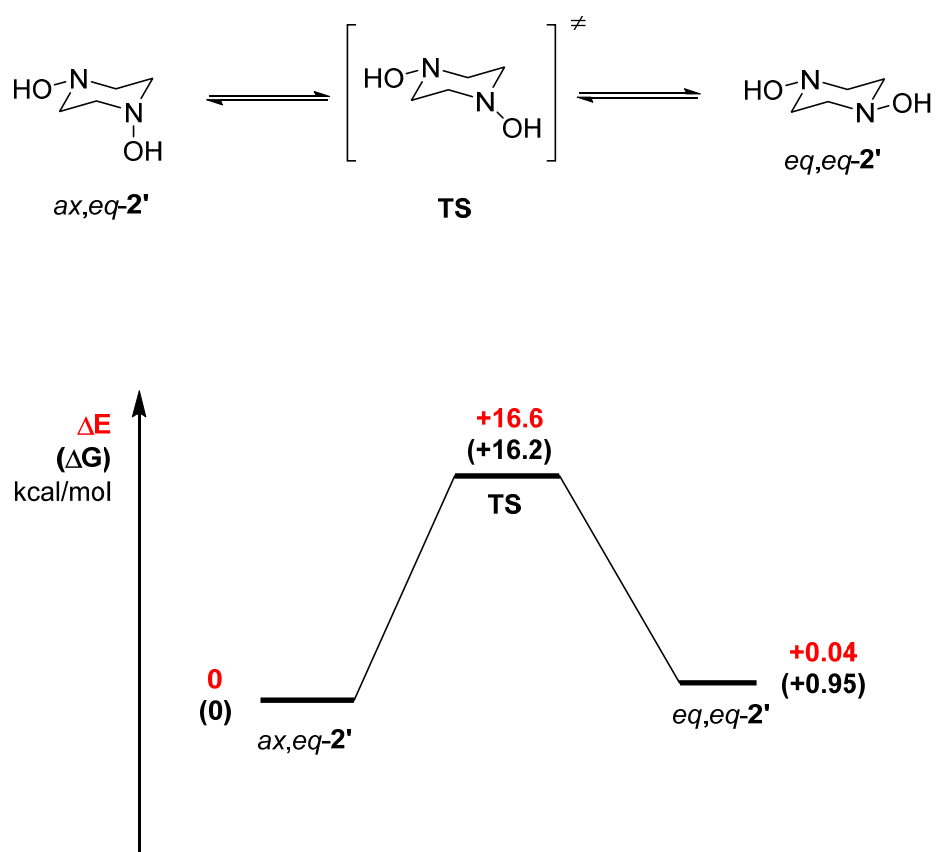

**Figure S1.** Energy profile for the inversion of nitrogen atom in PipzDiol 2

*ax,eq-2'*

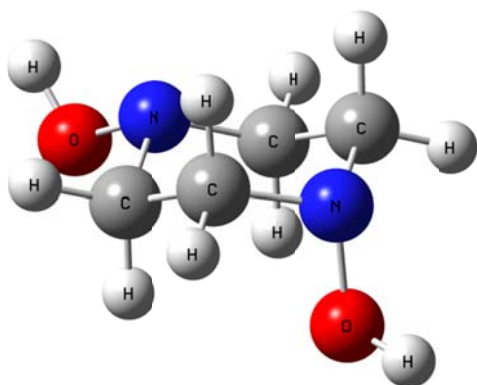

Charge 0; multiplicity 1

|   |             |             |             |
|---|-------------|-------------|-------------|
| C | 1.13138200  | -0.69687700 | -0.00493900 |
| C | 1.27390300  | 0.77898000  | -0.34546200 |
| N | 0.14052500  | 1.58743100  | 0.11061700  |
| C | -1.10904500 | 0.99440000  | -0.37194300 |
| C | -1.24016600 | -0.48264000 | -0.03262800 |
| N | -0.10375300 | -1.20940500 | -0.59690200 |
| O | 0.11653800  | 1.49982800  | 1.54217600  |
| O | -0.23347300 | -2.56479700 | -0.15501900 |
| H | 1.11167300  | -0.84176900 | 1.08644100  |
| H | 1.97772900  | -1.25409500 | -0.41499000 |
| H | 1.33329600  | 0.90762000  | -1.43137200 |
| H | 2.18790800  | 1.18013700  | 0.09818200  |
| H | -1.12114500 | 1.13050100  | -1.45848000 |
| H | -1.94613400 | 1.55250600  | 0.05344000  |
| H | -2.16278200 | -0.88051500 | -0.46318300 |
| H | -1.27215600 | -0.62688300 | 1.05860900  |
| H | 0.20136100  | 2.40920000  | 1.84802000  |
| H | -0.24342200 | -3.09747100 | -0.95778000 |

|                                                 |             |                         |
|-------------------------------------------------|-------------|-------------------------|
| DFT M11/Def2TZVP, solvent water, SMD model      |             |                         |
| Total electronic energy=                        | -418.277941 | $E_0$                   |
| Sum of electronic and zero-point Energies=      | -418.123195 | $E_0 + E_{\text{ZPE}}$  |
| Sum of electronic and thermal Energies=         | -418.115183 | $E_0 + E_{\text{tot}}$  |
| Sum of electronic and thermal Enthalpies=       | -418.114239 | $E_0 + H_{\text{corr}}$ |
| Sum of electronic and thermal Free Energies=    | -418.148422 | $E_0 + G_{\text{corr}}$ |
| Zero-point correction ( <i>unscaled</i> ) =     | 0.154747    |                         |
| Number of imaginary vibrational frequencies = 0 |             |                         |

eq,eq-2'

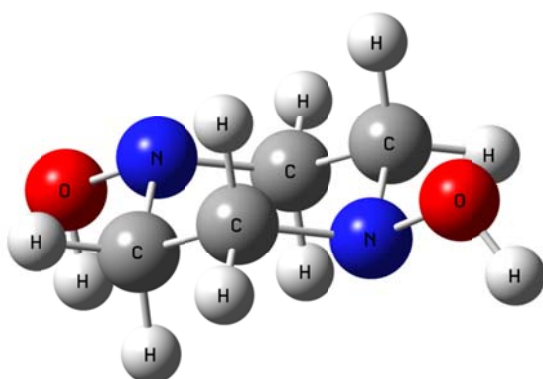

Charge 0; multiplicity 1

|   |             |             |             |
|---|-------------|-------------|-------------|
| C | 1.12353700  | -0.83645600 | -0.03452900 |
| C | 1.26090700  | 0.67041900  | 0.04595100  |
| N | 0.10413100  | 1.22720700  | 0.74490700  |
| C | -1.11757400 | 0.88594900  | 0.01943800  |
| C | -1.25256600 | -0.62083300 | -0.06262700 |
| N | -0.09628700 | -1.17185200 | -0.76814700 |
| O | 0.23064600  | 2.64097400  | 0.75030200  |
| O | -0.22654900 | -2.59311500 | -0.70879400 |
| H | 1.08413800  | -1.26904100 | 0.97744600  |
| H | 1.98068400  | -1.25936900 | -0.56384100 |
| H | 1.32695100  | 1.09942700  | -0.96878700 |
| H | 2.16632600  | 0.93460500  | 0.59742000  |
| H | -1.08167800 | 1.31875900  | -0.99543000 |
| H | -1.97300300 | 1.31008800  | 0.55049300  |
| H | -2.15907700 | -0.88230000 | -0.61367900 |
| H | -1.31627000 | -1.05225200 | 0.94858900  |
| H | 0.24905900  | 2.93499400  | -0.17654700 |
| H | -0.23809700 | -2.89029300 | -1.62530700 |

|                                                 |                                     |
|-------------------------------------------------|-------------------------------------|
| DFT M11/Def2TZVP, solvent water, SMD model      |                                     |
| Total electronic energy=                        | -418.277872 $E_0$                   |
| Sum of electronic and zero-point Energies=      | -418.122345 $E_0 + E_{\text{ZPE}}$  |
| Sum of electronic and thermal Energies=         | -418.114787 $E_0 + E_{\text{tot}}$  |
| Sum of electronic and thermal Enthalpies=       | -418.113843 $E_0 + H_{\text{corr}}$ |
| Sum of electronic and thermal Free Energies=    | -418.146915 $E_0 + G_{\text{corr}}$ |
| Zero-point correction ( <i>unscaled</i> ) =     | 0.155527                            |
| Number of imaginary vibrational frequencies = 0 |                                     |

# TS

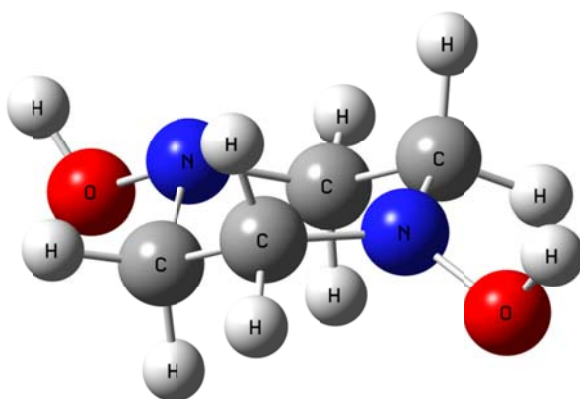

Charge 0; multiplicity 1

|   |             |             |             |
|---|-------------|-------------|-------------|
| C | 1.10966200  | -0.99693700 | 0.26761400  |
| C | 1.30554300  | 0.51185900  | 0.17416700  |
| N | 0.10515100  | 1.19792300  | 0.55575300  |
| C | -1.18997600 | 0.73695100  | 0.14670000  |
| C | -1.26919600 | -0.78235300 | 0.24152800  |
| N | -0.11556200 | -1.37027600 | -0.44049700 |
| O | 0.18766700  | 2.22884700  | 1.48554700  |
| O | -0.24590900 | -2.78833800 | -0.28528200 |
| H | 1.03416500  | -1.30682000 | 1.32239900  |
| H | 1.95163500  | -1.51521900 | -0.19811300 |
| H | 1.62017200  | 0.76885800  | -0.85225600 |
| H | 2.10737600  | 0.81429600  | 0.85289000  |
| H | -1.43151500 | 1.04399600  | -0.88572700 |
| H | -1.93934500 | 1.17898000  | 0.80861800  |
| H | -2.18003000 | -1.14271400 | -0.24321900 |
| H | -1.27337000 | -1.09860900 | 1.29705800  |
| H | 0.27085500  | 3.05780600  | 0.99635600  |
| H | -0.25787300 | -3.14613900 | -1.17981800 |

|                                                       |             |                  |
|-------------------------------------------------------|-------------|------------------|
| DFT M11/Def2TZVP, solvent water, SMD model            |             |                  |
| Total electronic energy=                              | -418.251524 | $E_0$            |
| Sum of electronic and zero-point Energies=            | -418.097733 | $E_0 + E_{ZPE}$  |
| Sum of electronic and thermal Energies=               | -418.090164 | $E_0 + E_{tot}$  |
| Sum of electronic and thermal Enthalpies=             | -418.089220 | $E_0 + H_{corr}$ |
| Sum of electronic and thermal Free Energies=          | -418.122669 | $E_0 + G_{corr}$ |
| Zero-point correction ( <i>unscaled</i> ) =           | 0.153791    |                  |
| Number of imaginary vibrational frequencies = 1; i378 |             |                  |

## X-Ray analysis

### X-ray crystallographic data and refinement details

For **2**•2PABA and  $[\text{H}_2(\mathbf{2})]^{2+}[\text{Ox}]^{2-}\cdot\text{H}_2\text{O}$  X-ray diffraction data were collected at 100K on a four-circle Rigaku Synergy S diffractometer equipped with a HyPix600HE area-detector (kappa geometry, shutterless  $\omega$ -scan technique), using graphite monochromatized Cu  $K_{\alpha}$ -radiation. The intensity data were integrated and corrected for absorption and decay by the CrysAlisPro program<sup>9</sup>. For  $[\text{H}_2(\mathbf{2})]^{2+}[\text{SO}_4]^{2-}$  intensities of reflections were measured with a Bruker APEXII DUO CCD diffractometer [ $\lambda(\text{MoK}\alpha) = 0.71073 \text{ \AA}$ ,  $\omega$ -scans,  $2\theta < 58^\circ$ ], and 2302 independent reflections were used in the further refinement. The structures were solved by direct methods using SHELXT<sup>10</sup> and refined on  $F^2$  using SHELXL-2018<sup>11</sup> (**2**•2PABA and  $[\text{H}_2(\mathbf{2})]^{2+}[\text{Ox}]^{2-}\cdot\text{H}_2\text{O}$ ) or Intrinsic Phasing and refined with the XL<sup>10</sup> refinement package using Least-Squares minimization in the OLEX2 program.<sup>12</sup> All non-hydrogen atoms were refined with individual anisotropic displacement parameters. For **2**•2PABA and  $[\text{H}_2(\mathbf{2})]^{2+}[\text{Ox}]^{2-}\cdot\text{H}_2\text{O}$  locations of amino and hydroxy hydrogen atoms were found from the electron density-difference map; these hydrogen atoms were refined with individual isotropic displacement parameters. For  $[\text{H}_2(\mathbf{2})]^{2+}[\text{SO}_4]^{2-}$  hydrogen atoms of NH and OH groups were located from difference Fourier synthesis. All other hydrogen atoms were placed in ideal calculated positions and refined as riding atoms with relative isotropic displacement parameters.

CCDC 2176251 for **2**•2PABA, CCDC 2176252 for  $[\text{H}_2(\mathbf{2})]^{2+}[\text{Ox}]^{2-}\cdot\text{H}_2\text{O}$  and CCDC 2175349 for  $[\text{H}_2(\mathbf{2})]^{2+}[\text{SO}_4]^{2-}$  contain the supplementary crystallographic information for this paper.

Graphical materials were prepared using Olex2, Mercury and Crystal explorer software.

---

<sup>9</sup> CrysAlisPro. Version 1.171.41.106a. *Rigaku Oxford Diffraction*, **2021**.

<sup>10</sup> Sheldrick, G. M. SHELXT - Integrated space-group and crystal-structure determination. *Acta Cryst.* **2015**, A71(1), 3-8.

<sup>11</sup> Sheldrick, G. M. Crystal structure refinement with SHELXL. *Acta Cryst.* **2015**, C71 (1), 3-8.

<sup>12</sup> Dolomanov, O.V.; Bourhis, L.J.; Gildea, R.J.; Howard, J.A.K.; Puschmann, H. OLEX2: a complete structure solution, refinement and analysis program. *J. Appl. Cryst.* **2009**, 42 (2), 229-341.

**Table S5.** *Experimental parameters for X-Ray analysis.*

|                                          |                                               |                                                       |                                                                          |
|------------------------------------------|-----------------------------------------------|-------------------------------------------------------|--------------------------------------------------------------------------|
| Identification code                      | <b>2•2PABA</b>                                | $[\text{H}_2(\mathbf{2})]^{2+}[\text{SO}_4]^{2-}$     | $[\text{H}_2(\mathbf{2})]^{2+}[\text{Ox}]^{2-} \cdot \text{H}_2\text{O}$ |
| Empirical formula                        | $\text{C}_9\text{H}_{12}\text{N}_2\text{O}_3$ | $\text{C}_4\text{H}_{12}\text{N}_2\text{O}_6\text{S}$ | $\text{C}_6\text{H}_{13.80}\text{N}_2\text{O}_{6.90}$                    |
| Formula weight                           | 196.21                                        | 216.22                                                | 224.40                                                                   |
| Temperature, K                           | 100                                           | 120                                                   | 100                                                                      |
| Wavelength, Å                            | 1.54184                                       | 0.71073                                               | 1.54184                                                                  |
| Crystal system                           | Monoclinic                                    | Triclinic                                             | Monoclinic                                                               |
| Space group                              | $\text{P2}_1/\text{n}$                        | $\text{P}-1$                                          | $\text{P2}_1/\text{n}$                                                   |
| Unit cell dimensions                     |                                               |                                                       |                                                                          |
| a, Å                                     | 10.63990(10) Å                                | 5.7797(4)                                             | 9.54180(10)                                                              |
| b, Å                                     | 8.49780(10) Å                                 | 6.3309(5)                                             | 9.76040(10)                                                              |
| c, Å                                     | 11.93370(10)                                  | 12.8187(10)                                           | 10.15310(10)                                                             |
| $\alpha$ , °                             | 90°.                                          | 76.647(2)                                             | 90                                                                       |
| $\beta$ , °                              | 116.019(2)°                                   | 78.320(2)                                             | 97.0180(10)                                                              |
| $\gamma$ , °                             | 90                                            | 74.621(2)                                             | 90                                                                       |
| Volume, Å <sup>3</sup>                   | 969.64(2)                                     | 435.01(6)                                             | 938.492(17)                                                              |
| Z                                        | 4                                             | 2 ( $Z' = 1$ )                                        | 4                                                                        |
| Density (calculated), g/cm <sup>-3</sup> | 1.344                                         | 1.651                                                 | 1.588                                                                    |
| Absorption coefficient, mm <sup>-1</sup> | 0.856                                         | 0.377                                                 | 1.275                                                                    |
| F(000)                                   | 416                                           | 228                                                   | 476                                                                      |
| Reflections collected                    | 12736                                         | 5422                                                  | 12301                                                                    |
| Independent reflections                  | 2067                                          | 2302                                                  | 1990                                                                     |
| Goodness-of-fit on F2                    | 1.062                                         | 1,042                                                 | 1.095                                                                    |
| Final R indices [ $I > 2\sigma(I)$ ]     | R1 = 0.0427<br>wR2 = 0.1176                   | R1 = 0,0358<br>wR2 = 0,0912                           | R1 = 0.0329<br>wR2 = 0.0918                                              |

**1,4-Dihydropiperazine-1,4-dium sulfate  $[H_2(2)]^{2+}[SO_4]^{2-}$**

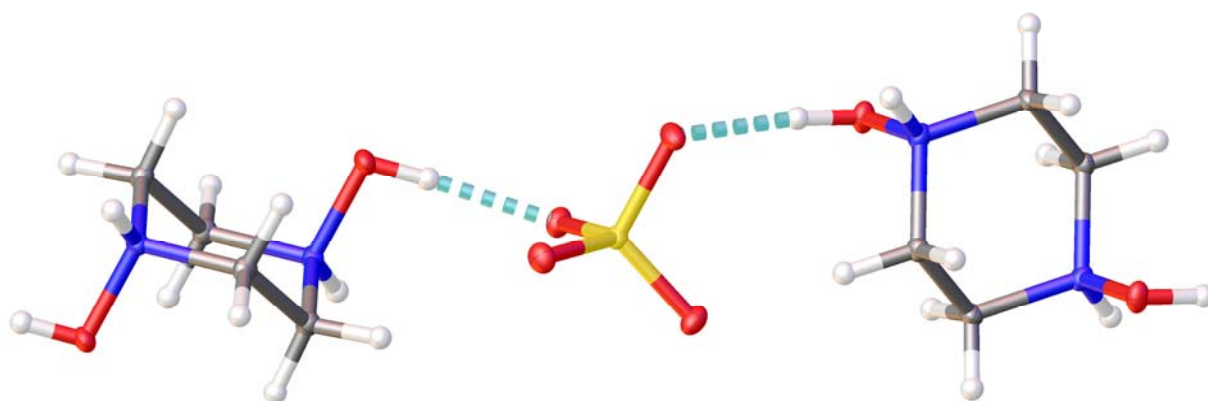

**Figure S2.** General view of the compound  $[H_2(2)]^{2+}[SO_4]^{2-}$  in representation of non-hydrogen atoms as thermal ellipsoids at 30% probability level.

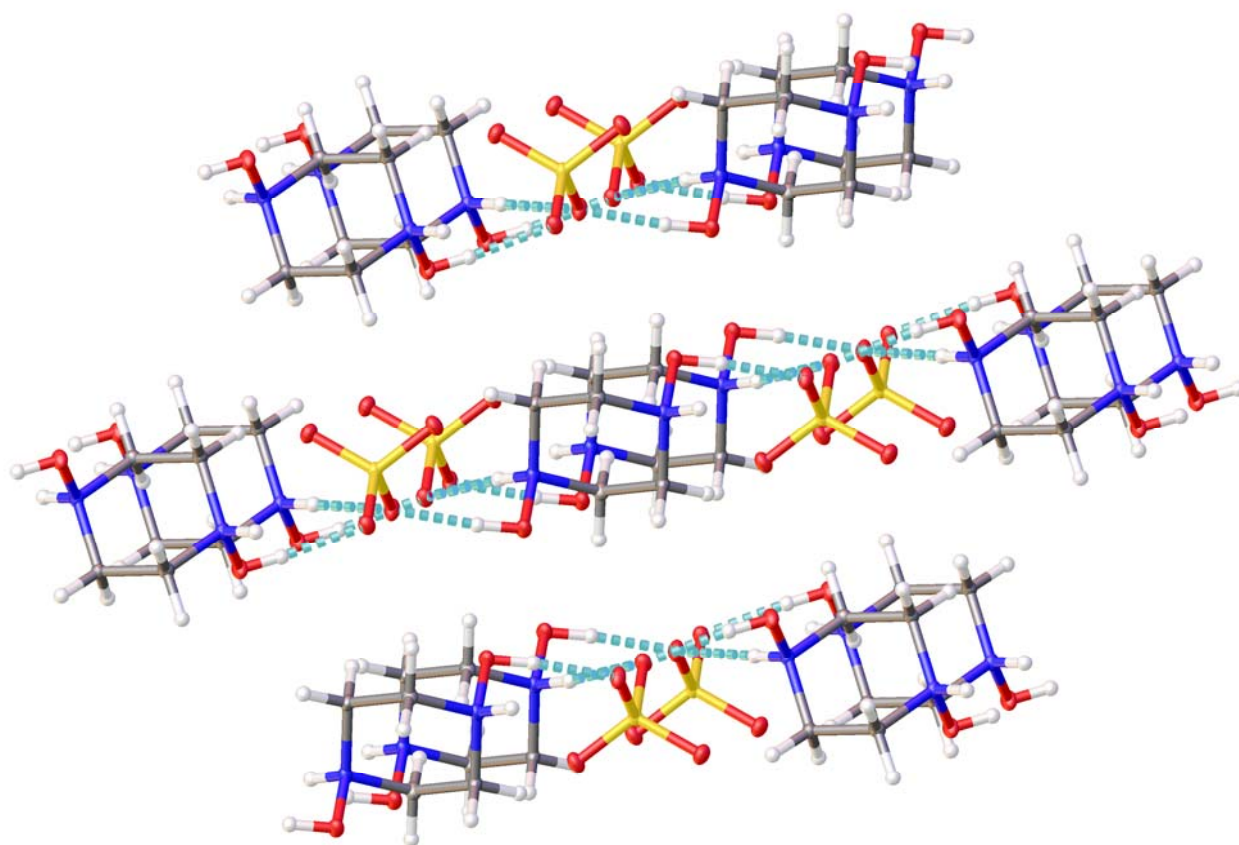

**Figure S3.** View of the  $[H_2(2)]^{2+}[SO_4]^{2-}$  packing in representation of non-hydrogen atoms as thermal ellipsoids at 30% probability level.

**Table S6.** Hydrogen bonds and short contacts of  $[H_2(2)]^{2+}[SO_4]^{2-}$ .

| :: Resd 0 - Infinite (Type2) 2D-Network                       |           |            |            |            |              |
|---------------------------------------------------------------|-----------|------------|------------|------------|--------------|
| :: Base Vectors: 1 : [1 0 0], 2 : [0 -1 -1], Plane: (0 1 -1)  |           |            |            |            |              |
|                                                               |           |            |            |            |              |
| Donor --- H...Acceptor                                        | [ARU]     | D – H, Å   | H...A, Å   | D...A, Å   | D - H...A, ° |
| O1--H1 .....O4                                                | [1555.03] | 0.8938(16) | 1.6966(16) | 2.5861(16) | 173.05(14)   |
| N1--H1A.....O3                                                | [1655.03] | 0.8730(17) | 2.4485(17) | 2.9707(17) | 118.93(13)   |
| N1--H1A.....O6                                                | [1655.03] | 0.8730(17) | 1.8516(17) | 2.7216(17) | 174.27(15)   |
| O2--H2 .....O6                                                | [1555.03] | 0.8373(16) | 1.7576(16) | 2.5933(16) | 175.73(14)   |
| N2--H2C.....O4                                                | [1455.03] | 0.8525(17) | 1.8494(17) | 2.6971(17) | 172.72(15)   |
| N2--H2C.....O5                                                | [1455.03] | 0.8525(17) | 2.5598(17) | 3.1068(17) | 122.94(13)   |
|                                                               |           |            |            |            |              |
| C2--H2A.....O3                                                | [2856.03] | 0.990(2)   | 2.427(2)   | 3.246(2)   | 139.80(16)   |
| C2--H2B.....O3                                                | [2756.03] | 0.990(2)   | 2.578(2)   | 3.173(2)   | 118.61(13)   |
| C3--H3A.....O3                                                | [1465.03] | 0.990(2)   | 2.384(2)   | 3.327(2)   | 158.86(18)   |
| C3--H3A.....O5                                                | [1465.03] | 0.990(2)   | 2.592(2)   | 3.279(2)   | 126.57(16)   |
| C4--H4A.....O5                                                | [2567.03] | 0.990(2)   | 2.459(2)   | 3.322(2)   | 145.45(14)   |
| C4--H4B.....O5                                                | [2667.03] | 0.990(2)   | 2.581(2)   | 3.235(2)   | 123.57(14)   |
|                                                               |           |            |            |            |              |
| :: Resd 0 - Infinite (Type3) 2D-Network                       |           |            |            |            |              |
| :: Base Vectors: 1 : [1 0 0], 2 : [0 -1 -1] , Plane: (0 1 -1) |           |            |            |            |              |

**1,4-Dihydropiperazine-1,4-diium oxalate monohydrate  $[\text{H}_2(\mathbf{2})]^{2+}[\text{Ox}]^{2-} \cdot \text{H}_2\text{O}$**

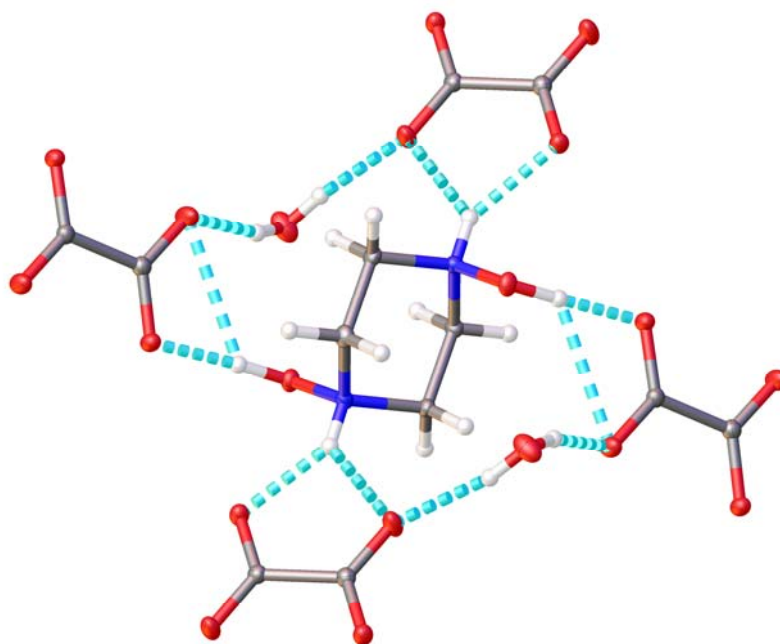

**Figure S4.** General view of the compound  $[\text{H}_2(\mathbf{2})]^{2+}[\text{Ox}]^{2-} \cdot \text{H}_2\text{O}$  in representation of non-hydrogen atoms as thermal ellipsoids at 30% probability level.

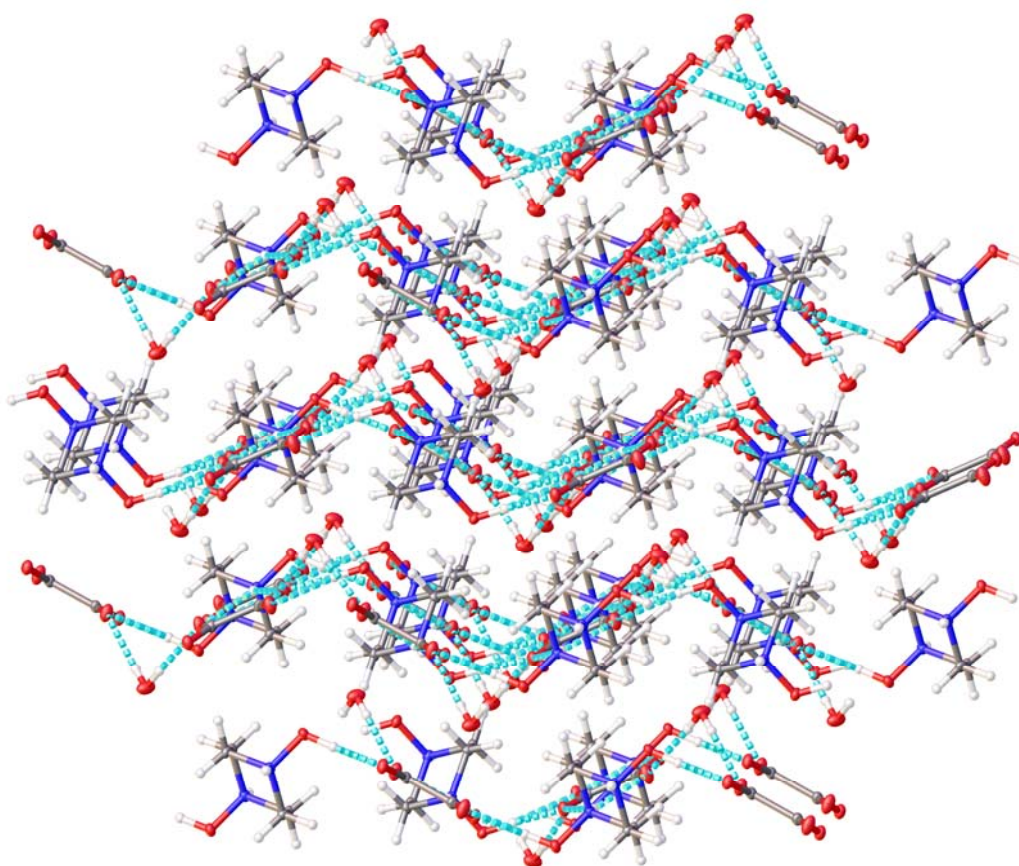

**Figure S5.** View of the  $[\text{H}_2(\mathbf{2})]^{2+}[\text{Ox}]^{2-} \cdot \text{H}_2\text{O}$  packing in representation of non-hydrogen atoms as thermal ellipsoids at 30% probability level.

**Table S7.** Hydrogen bonds and short contacts of  $[H_2(2)]^{2+}[Ox]^{2-} \cdot H_2O$ .

| :: Resd 0 - Infinite (Type2) 2D-Network                   |           |           |           |            |              |
|-----------------------------------------------------------|-----------|-----------|-----------|------------|--------------|
| :: Base Vectors: 1 : [0 0 1], 2 : [1 0 0], Plane: (0 1 0) |           |           |           |            |              |
|                                                           |           |           |           |            |              |
| :: Resd 0 - Infinite (Type2) 2D-Network                   |           |           |           |            |              |
| :: Base Vectors: 1 : [1 0 0], 2 : [0 0 1], Plane: (0 1 0) |           |           |           |            |              |
|                                                           |           |           |           |            |              |
| Donor -H...Acceptor                                       | [ARU]     | D – H, Å  | H...A, Å  | D...A, Å   | D - H...A, ° |
| O1--H1.....O5                                             | [1556.02] | 1.01(2)   | 1.57(2)   | 2.5733(11) | 176.4(17)    |
| O1--H1.....O6                                             | [1556.02] | 1.01(2)   | 2.57(2)   | 3.2371(12) | 123.2(14)    |
| N1--H1A.....O4                                            | [4465.02] | 0.891(19) | 1.955(19) | 2.7364(12) | 145.5(15)    |
| N1--H1A.....O6                                            | [4465.02] | 0.891(19) | 2.166(18) | 2.8281(13) | 130.6(15)    |
| O2--H2.....O4                                             | [1555.02] | 0.94(2)   | 1.62(2)   | 2.5632(11) | 178(2)       |
| N2--H2A.....O3                                            | [4565.02] | 0.897(17) | 2.115(16) | 2.7875(13) | 131.1(13)    |
| N2--H2A.....O5                                            | [4565.02] | 0.897(17) | 1.960(17) | 2.7513(12) | 146.2(14)    |
| O7--H7A.....O3                                            | [1555.02] | 0.82(3)   | 2.03(3)   | 2.8295(14) | 165(3)       |
| O7--H7B.....O6                                            | [4465.02] | 0.84(2)   | 2.02(2)   | 2.8454(14) | 165.5(18)    |
|                                                           |           |           |           |            |              |
| C2--H2B.....O1                                            | [3677.01] | 0.99      | 2.55      | 3.3361(13) | 137          |
| C2--H2C.....O3                                            | [1555.02] | 0.99      | 2.48      | 3.3323(13) | 144          |
| C3--H3B.....O7                                            | [3667.03] | 0.99      | 2.28      | 3.2094(16) | 156          |
| C4--H4A.....O6                                            | [1556.02] | 0.99      | 2.50      | 3.3512(13) | 144          |
| C4--H4A.....O3                                            | [4565.02] | 0.99      | 2.57      | 3.0326(14) | 108          |
| C4--H4B.....O5                                            | [2646.02] | 0.99      | 2.59      | 3.5741(14) | 173          |
|                                                           |           |           |           |            |              |
| :: Resd 0 - Infinite (Type3) 2D-Network                   |           |           |           |            |              |
| :: Base Vectors: 1 : [0 0 1], 2 : [1 0 0], Plane: (0 1 0) |           |           |           |            |              |
|                                                           |           |           |           |            |              |
| :: Resd 0 - Infinite (Type3) 2D-Network                   |           |           |           |            |              |
| :: Base Vectors: 1 : [0 0 1], 2 : [1 0 0], Plane: (0 1 0) |           |           |           |            |              |

## Co-crystal of 1,4-dihydropyridazine and 4-aminobenzoic acid (2•2PABA)

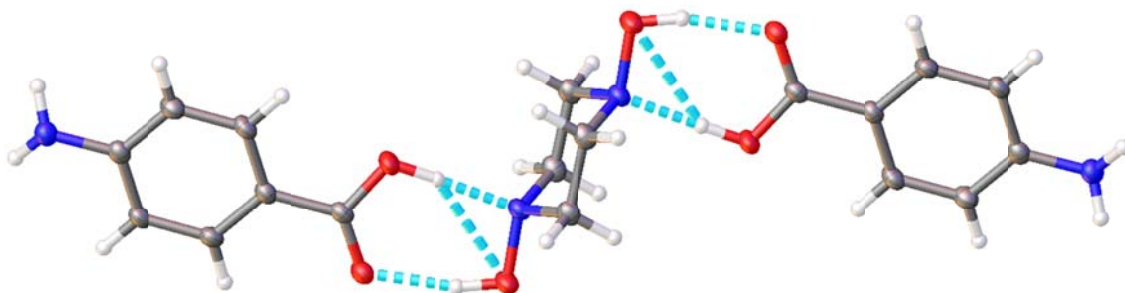

**Figure S6.** General view of the compound **2•2PABA** in representation of non-hydrogen atoms as thermal ellipsoids at 30% probability level.

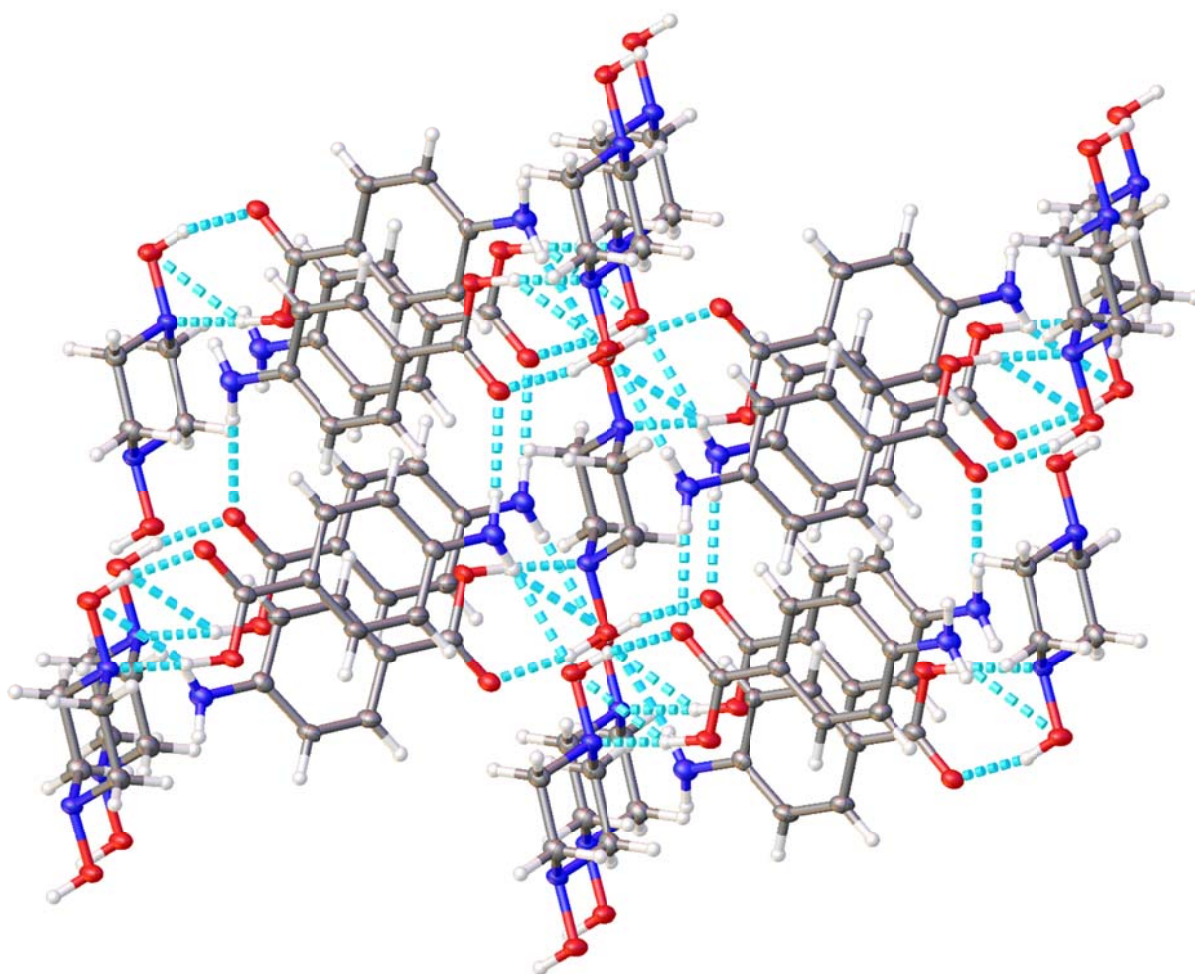

**Figure S7.** View of the **2•2PABA** packing in representation of non-hydrogen atoms as thermal ellipsoids at 30% probability level.

**Table S8.** Hydrogen bonds and short contacts of **2•2PABA**.

| Donor---H...Acceptor                                    | [ARU]     | D - H, Å  | H...A, Å | D...A, Å   | D - H...A, ° |
|---------------------------------------------------------|-----------|-----------|----------|------------|--------------|
| <b>O1--H1.....O2</b>                                    | [1555.01] | 0.92(2)   | 1.78(2)  | 2.6853(15) | 167(2)       |
| <b>N2--H2A.....O2</b>                                   | [2555.01] | 0.902(19) | 2.13(2)  | 3.0117(15) | 166.2(16)    |
| <b>N2--H2B.....O1</b>                                   | [4465.02] | 0.89(2)   | 2.41(2)  | 3.1824(15) | 146.7(15)    |
| <b>O3--H3.....O1</b>                                    | [1555.02] | 0.98(3)   | 2.45(3)  | 3.2692(14) | 141.6(19)    |
| <b>O3--H3.....N1</b>                                    | [1555.02] | 0.98(3)   | 1.65(3)  | 2.6211(15) | 174(2)       |
|                                                         |           |           |          |            |              |
| <b>C1--H1A.....O2</b>                                   | [2645.01] | 0.99      | 2.53     | 3.3529(16) | 140          |
|                                                         |           |           |          |            |              |
| :: Resd 0 - Infinite (Type3) 3D-Framework: Det = 2      |           |           |          |            |              |
| :: Base Vectors: 1 : [0 1 0], 2 : [1 0 1], 3 : [1 0 -1] |           |           |          |            |              |
